# Supplementary material for: Reprogrammed Cells Display Distinct Proteomic Signatures Associated with Colony Morphology Variability
Source: Hindawi journal article supplement (doi:10.1155/2019/8036035), 2019-11-18
Supplement: f1 [file 8036035.f1.zip]

**Supplement table 2: Proteins being more abundant (named by gene names) in stable colony morphology group.**

**S=stable colony morphology group,U-1= Unstable class 1 morphology group, U-2=unstable class 2 morphology group .**

**FC=fold change. The list is sorted by FC. All proteins have a p-value <0.05 and a FC p-value <0.05. The list includes 276 proteins.**

**Expression values are log2 transformed LFQ intensity values.**

| Gene names | 1-C  | 3-A  | 4-B  | 5-A  | 5-B  | 6-B  | 7-A  | 7-B  | 3-D  | 1-A  | 1-B  | 2-A  | 2-B  | 2-C  | 3-B  | 6-A  | 6-C  | 4-C  | 3-C  | 4-A  | Median | Median | p-value | FC  | FC      |
|------------|------|------|------|------|------|------|------|------|------|------|------|------|------|------|------|------|------|------|------|------|--------|--------|---------|-----|---------|
|            | S    | S    | S    | S    | S    | S    | S    | S    | S    | S    | S    | S    | S    | S    | U-1  | U-1  | U-1  | U-1  | U-2  | U-2  | S      | U      |         | S/U | p-value |
| RBPMS2     | 28.2 | 28.5 | 27.8 | 28.5 | 27.4 | 27.4 | 28.3 | 27.9 | 28.0 | 28.4 | 28.1 | 28.4 | 27.6 | 28.0 | 27.1 | 21.3 | 22.3 | 24.6 | 22.4 | NaN  | 28.0   | 22.4   | 0.0     | 5.6 | 0       |
| EPCAM      | 28.4 | 27.9 | 28.0 | 29.4 | 29.3 | 29.6 | 28.3 | 27.9 | 28.1 | 28.5 | 28.0 | 28.5 | 28.0 | 28.2 | 27.1 | 22.1 | 20.7 | 24.6 | 25.9 | 21.5 | 28.2   | 23.4   | 0.0     | 4.9 | 0       |
| SMPDL3B    | 28.3 | 27.8 | 27.7 | 27.6 | 28.1 | 27.9 | 28.5 | 28.3 | 28.2 | 28.0 | 27.6 | 28.1 | 27.5 | 27.9 | 25.4 | 24.5 | 24.7 | 22.3 | 22.4 | 22.6 | 27.9   | 23.6   | 0.0     | 4.4 | 0       |
| FBXO2      | 26.7 | 26.3 | 25.5 | 26.9 | 27.0 | 27.3 | 27.6 | 26.6 | 27.3 | 26.5 | 26.1 | 26.0 | 26.6 | 26.1 | 24.8 | 22.1 | NaN  | 22.7 | 22.3 | 21.9 | 26.6   | 22.3   | 0.0     | 4.3 | 0       |
| KRT19      | 30.4 | 30.0 | 29.9 | 30.2 | 29.7 | 29.7 | 30.1 | 30.1 | 30.1 | 30.0 | 29.4 | 29.8 | 30.0 | 30.0 | 28.6 | 24.5 | 23.3 | 26.9 | 27.0 | 24.4 | 30.0   | 25.7   | 0.0     | 4.3 | 0       |
| TRIM71     | 30.4 | 30.3 | 29.8 | 29.7 | 30.0 | 30.0 | 30.0 | 30.1 | 30.1 | 30.1 | 30.3 | 29.5 | 30.1 | 30.4 | 29.8 | 22.8 | 24.6 | 28.1 | 27.1 | 23.3 | 30.1   | 25.8   | 0.0     | 4.2 | 0       |
| ADD2       | 28.2 | 28.2 | 27.7 | 27.5 | 28.4 | 28.1 | 27.9 | 27.8 | 28.0 | 28.2 | 28.1 | 27.8 | 28.0 | 28.3 | 27.9 | 26.1 | 23.7 | 24.0 | 24.2 | 22.5 | 28.1   | 24.1   | 0.0     | 3.9 | 0.00    |
| L1TD1      | 32.9 | 32.5 | 32.7 | 32.7 | 32.4 | 32.2 | 32.3 | 32.6 | 32.4 | 32.7 | 32.6 | 32.5 | 32.0 | 32.6 | 31.9 | 25.3 | 24.9 | 30.4 | 30.2 | 27.1 | 32.5   | 28.6   | 0.0     | 3.9 | 0.00    |
| CYP2S1     | 29.5 | 29.3 | 29.6 | 30.4 | 29.3 | 29.3 | 29.3 | 29.1 | 29.6 | 29.2 | 29.1 | 29.9 | 29.2 | 29.5 | 27.8 | 24.0 | 21.6 | 26.9 | 27.4 | 22.6 | 29.3   | 25.4   | 0.0     | 3.9 | 0.00    |
| ALPL       | 29.1 | 29.1 | 29.0 | 29.0 | 29.0 | 29.0 | 28.7 | 29.1 | 29.2 | 29.0 | 29.0 | 29.1 | 29.0 | 29.4 | 27.7 | 24.7 | 23.4 | 25.2 | 26.6 | NaN  | 29.0   | 25.2   | 0.0     | 3.9 | 0.00    |
| DNMT3B     | 32.6 | 32.2 | 32.2 | 32.2 | 32.5 | 32.6 | 33.2 | 32.2 | 32.4 | 32.4 | 31.7 | 32.7 | 31.2 | 32.3 | 31.0 | 27.3 | 27.7 | 29.3 | 29.4 | 25.0 | 32.3   | 28.5   | 0.0     | 3.8 | 0.00    |
| SALL4      | 29.3 | 29.5 | 29.2 | 29.5 | 29.2 | 29.2 | 29.6 | 29.3 | 29.3 | 29.7 | 29.7 | 28.9 | 29.1 | 29.7 | 28.9 | 24.0 | 23.4 | 27.2 | 27.3 | 21.5 | 29.3   | 25.6   | 0.0     | 3.7 | 0.00    |
| JARID2     | 27.3 | 26.1 | 25.3 | 26.4 | 27.0 | 25.7 | 26.6 | 27.0 | 26.7 | 27.1 | 26.7 | 26.9 | 24.9 | 26.8 | 25.5 | 21.2 | NaN  | 23.1 | 23.0 | NaN  | 26.7   | 23.0   | 0.0     | 3.7 | 0.00    |
| CGN        | 28.8 | 29.0 | 26.5 | 28.2 | 28.9 | 29.0 | 28.4 | 28.6 | 28.5 | 28.3 | 27.7 | 28.0 | 27.5 | 28.5 | 25.4 | 26.6 | 23.9 | 24.4 | 26.5 | 22.6 | 28.5   | 24.9   | 0.0     | 3.6 | 0.00    |
| APOE       | 30.2 | 30.1 | 29.8 | 30.1 | 29.9 | 30.3 | 29.8 | 29.6 | 30.0 | 29.7 | 29.5 | 29.9 | 28.9 | 30.0 | 28.6 | 25.6 | 22.6 | 27.2 | 27.1 | 25.7 | 29.9   | 26.4   | 0.0     | 3.5 | 0.00    |
| DSG2       | 27.9 | 27.8 | 27.0 | 27.7 | 27.9 | 28.0 | 27.1 | 27.4 | 28.1 | 28.3 | 27.7 | 28.1 | 26.6 | 28.1 | 26.5 | 24.4 | 24.7 | 23.6 | 22.8 | NaN  | 27.8   | 24.4   | 0.0     | 3.4 | 0.00    |
| DSP        | 28.0 | 28.1 | 27.6 | 27.8 | 28.6 | 28.4 | 28.7 | 28.7 | 28.5 | 28.6 | 28.3 | 26.9 | 28.3 | 27.8 | 27.3 | 24.7 | 25.7 | 24.8 | 25.1 | 23.8 | 28.3   | 25.0   | 0.0     | 3.4 | 0.00    |
| AASS       | 33.2 | 32.8 | 30.8 | 33.0 | 32.7 | 32.8 | 33.3 | 33.0 | 33.0 | 32.0 | 32.0 | 33.0 | 32.1 | 32.7 | 31.2 | 29.1 | 29.3 | 29.7 | 29.6 | 27.9 | 32.8   | 29.5   | 0.0     | 3.3 | 0.00    |
| VRTN       | 28.9 | 28.7 | 28.9 | 29.3 | 28.9 | 29.2 | 28.4 | 28.5 | 28.8 | 28.6 | 28.4 | 28.7 | 28.2 | 28.4 | 28.0 | NaN  | 24.6 | 25.8 | 25.0 | NaN  | 28.7   | 25.4   | 0.0     | 3.3 | 0.00    |
| BUB1B      | 27.0 | 26.5 | 25.3 | 25.7 | 26.5 | 27.5 | 26.7 | 27.5 | 26.7 | 27.2 | 26.9 | 25.4 | 26.2 | 27.5 | 26.4 | 22.7 | 23.0 | 24.1 | 23.4 | NaN  | 26.7   | 23.4   | 0.0     | 3.3 | 0.00    |
| DPPA4      | 30.1 | 30.0 | 29.8 | 29.9 | 30.8 | 30.9 | 29.8 | 29.1 | 30.3 | 30.0 | 30.0 | 29.8 | 29.5 | 30.4 | 29.6 | 25.6 | 21.5 | 28.0 | 28.0 | 22.5 | 30.0   | 26.8   | 0.0     | 3.2 | 0.00    |
| AK4        | 29.6 | 30.3 | 30.4 | 29.5 | 30.0 | 29.4 | 29.0 | 29.1 | 29.9 | 30.1 | 30.0 | 30.1 | 29.7 | 30.1 | 29.5 | 26.5 | 25.3 | 27.5 | 27.3 | 22.2 | 30.0   | 26.9   | 0.0     | 3.1 | 0.00    |
| CKMT1A     | 30.4 | 30.1 | 30.1 | 30.2 | 30.1 | 29.8 | 29.9 | 30.0 | 30.0 | 30.0 | 29.7 | 30.4 | 29.7 | 30.0 | 28.9 | 26.7 | 26.8 | 27.8 | 27.1 | 26.6 | 30.0   | 27.0   | 0.0     | 3.0 | 0.00    |
| ERBB2      | 28.1 | 28.7 | 28.9 | 29.1 | 29.1 | 29.1 | 28.2 | 28.5 | 28.6 | 29.0 | 29.0 | 29.0 | 28.0 | 28.0 | 27.8 | 25.1 | 24.7 | 27.2 | 26.5 | 25.0 | 28.8   | 25.8   | 0.0     | 3.0 | 0.00    |
| CGNL1      | 27.3 | 27.8 | 26.6 | 27.4 | 26.7 | 27.5 | 27.7 | 28.0 | 27.5 | 26.6 | 25.8 | 26.4 | 26.9 | 27.2 | 24.8 | NaN  | 24.0 | 24.5 | 22.5 | NaN  | 27.2   | 24.2   | 0.0     | 3.0 | 0.00    |
| PCK2       | 30.7 | 30.6 | 30.2 | 30.7 | 30.9 | 31.0 | 29.7 | 31.1 | 30.7 | 30.4 | 30.3 | 30.7 | 30.7 | 30.8 | 29.9 | 27.1 | 28.8 | 27.8 | 27.7 | 24.6 | 30.7   | 27.7   | 0.0     | 2.9 | 0.00    |
| CTH        | 27.2 | 27.1 | 27.3 | 27.9 | 27.2 | 27.5 | 27.8 | 28.3 | 27.9 | 27.1 | 27.3 | 27.4 | 28.0 | 27.8 | 26.7 | 23.9 | 24.5 | 24.5 | 25.5 | 23.6 | 27.4   | 24.5   | 0.0     | 2.9 | 0.00    |
| CD9        | 27.8 | 27.4 | 28.2 | 27.7 | 28.0 | 26.6 | 28.0 | 27.5 | 27.6 | 28.4 | 28.0 | 27.7 | 28.1 | 28.0 | 27.4 | NaN  | 24.1 | 25.3 | 25.1 | 21.5 | 27.9   | 25.1   | 0.0     | 2.8 | 0.00    |
| PYCARD     | 27.5 | 26.7 | 26.8 | 25.4 | 26.4 | 26.4 | 27.2 | 27.6 | 27.1 | 27.5 | 26.6 | 26.7 | 25.9 | 26.8 | 25.8 | NaN  | 23.0 | 23.1 | 23.9 | 24.6 | 26.8   | 23.9   | 0.0     | 2.8 | 0.00    |
| KRT18      | 32.1 | 31.9 | 32.0 | 32.1 | 32.3 | 31.9 | 32.1 | 32.0 | 31.7 | 32.1 | 31.4 | 31.8 | 31.9 | 32.1 | 31.5 | 27.4 | 28.3 | 30.3 | 31.1 | 26.8 | 32.0   | 29.3   | 0.0     | 2.7 | 0.00    |
| CETN3      | 26.2 | 25.5 | 23.1 | 25.9 | 25.0 | 24.2 | 26.4 | 23.0 | 24.0 | 25.3 | 25.3 | 26.1 | 25.5 | 25.5 | 24.2 | 21.6 | 22.8 | 22.6 | 24.1 | 22.1 | 25.4   | 22.7   | 0.0     | 2.7 | 0.00    |
| IMPA2      | 27.6 | 27.9 | 26.3 | 25.8 | 28.0 | 25.2 | 25.9 | 27.7 | 27.2 | 26.0 | 26.2 | 26.6 | 26.8 | 27.6 | 25.8 | 23.8 | 23.8 | 24.2 | 22.9 | 25.1 | 26.7   | 24.0   | 0.0     | 2.7 | 0.00    |
| MFGE8      | 29.2 | 29.8 | 29.3 | 29.0 | 29.3 | 29.0 | 29.0 | 29.3 | 29.7 | 29.5 | 29.0 | 29.6 | 29.9 | 28.4 | 28.2 | 26.3 | 24.6 | 27.6 | 26.8 | 23.8 | 29.3   | 26.6   | 0.0     | 2.7 | 0.00    |

|          |      |      |      |      |      |      |      |      |      |      |      |      |      |      |      |      |      |      |      |      |      |      |     |     |      |
|----------|------|------|------|------|------|------|------|------|------|------|------|------|------|------|------|------|------|------|------|------|------|------|-----|-----|------|
| SLC7A3   | 27.8 | 27.5 | 26.0 | 28.1 | 27.3 | 27.1 | 26.1 | 27.2 | 27.0 | 25.8 | 26.2 | 26.8 | 26.5 | 27.3 | 24.4 | NaN  | NaN  | 24.4 | 23.8 | NaN  | 27.1 | 24.4 | 0.0 | 2.7 | 0.00 |
| PDLIM1   | 30.6 | 29.4 | 26.2 | 29.7 | 30.4 | 30.6 | 30.5 | 30.2 | 30.1 | 30.1 | 29.4 | 29.1 | 28.1 | 29.9 | 27.8 | 27.6 | 27.0 | 28.3 | 27.2 | 23.5 | 30.0 | 27.4 | 0.0 | 2.6 | 0.00 |
| PODXL    | 31.0 | 30.6 | 30.4 | 31.1 | 31.2 | 30.9 | 31.0 | 30.8 | 31.0 | 30.7 | 30.7 | 30.7 | 30.7 | 30.7 | 30.0 | 28.2 | 24.7 | 29.8 | 28.3 | 23.4 | 30.8 | 28.2 | 0.0 | 2.5 | 0.00 |
| F11R     | 28.7 | 28.2 | 28.0 | 28.3 | 28.6 | 28.3 | 28.1 | 27.7 | 27.8 | 27.8 | 27.4 | 28.7 | 27.9 | 28.6 | 26.5 | 26.1 | 25.2 | 25.1 | 26.2 | 22.6 | 28.1 | 25.6 | 0.0 | 2.5 | 0.00 |
| TXLNG    | 27.8 | 26.6 | 27.5 | 27.6 | 26.9 | 26.6 | 27.2 | 28.5 | 26.8 | 27.9 | 27.3 | 27.7 | 25.8 | 26.5 | 26.3 | 22.7 | 24.9 | 24.6 | 26.5 | 24.1 | 27.2 | 24.8 | 0.0 | 2.5 | 0.00 |
| TUBA4A   | 27.8 | 27.5 | 27.5 | 27.5 | 27.2 | 28.0 | 27.8 | 27.5 | 27.7 | 27.2 | 26.9 | 26.8 | 27.5 | 26.7 | 26.0 | NaN  | 25.8 | 24.2 | 22.6 | NaN  | 27.5 | 25.0 | 0.0 | 2.5 | 0.00 |
| REEP6    | 25.9 | 24.8 | 24.9 | 22.8 | 24.6 | 24.4 | 24.3 | 25.6 | 25.0 | 24.8 | 24.3 | 25.6 | 23.7 | 25.2 | 24.2 | 23.9 | 21.3 | 21.3 | 22.6 | 22.2 | 24.8 | 22.4 | 0.0 | 2.4 | 0.00 |
| PAWR     | 28.6 | 28.5 | 26.9 | 27.9 | 28.8 | 28.4 | 28.6 | 28.4 | 28.7 | 28.7 | 28.3 | 27.5 | 28.0 | 28.8 | 27.2 | 25.3 | 25.6 | 26.6 | 26.6 | 21.7 | 28.5 | 26.1 | 0.0 | 2.4 | 0.00 |
| CYB5R2   | 28.1 | 27.5 | 28.1 | 27.1 | 26.6 | 26.6 | 28.3 | 26.9 | 27.7 | 27.6 | 27.7 | 27.7 | 27.7 | 27.9 | 26.8 | 23.9 | 25.3 | 26.0 | 24.3 | NaN  | 27.7 | 25.3 | 0.0 | 2.4 | 0.00 |
| VSNL1    | 28.2 | 28.2 | 26.8 | 28.1 | 26.6 | 26.6 | 27.7 | 27.7 | 27.3 | 28.1 | 27.7 | 27.6 | 27.8 | 27.7 | 26.8 | NaN  | NaN  | 24.2 | 25.1 | 25.6 | 27.7 | 25.4 | 0.0 | 2.4 | 0.00 |
| SALL2    | 31.2 | 31.3 | 31.3 | 31.7 | 31.9 | 32.4 | 31.2 | 31.1 | 31.4 | 31.5 | 31.4 | 31.0 | 30.9 | 31.7 | 30.9 | 28.8 | 28.7 | 30.1 | 29.2 | 27.5 | 31.3 | 29.0 | 0.0 | 2.3 | 0.00 |
| CDCA7L   | 26.1 | 26.2 | 26.0 | 27.1 | 27.2 | 27.7 | 26.5 | 25.9 | 26.4 | 26.5 | 26.2 | 26.7 | 25.5 | 25.4 | 26.7 | 24.1 | 23.4 | 23.9 | 24.4 | 22.3 | 26.3 | 24.0 | 0.0 | 2.3 | 0.00 |
| HPDL     | 27.6 | 26.7 | 23.3 | 28.7 | 27.6 | 27.6 | 27.8 | 27.1 | 27.6 | 27.2 | 26.7 | 26.9 | 25.4 | 26.9 | 24.9 | NaN  | 22.4 | 22.2 | 26.9 | 25.3 | 27.2 | 24.9 | 0.0 | 2.3 | 0.00 |
| SLC2A3   | 31.0 | 30.4 | 30.6 | 30.9 | 31.6 | 32.2 | 31.6 | 31.9 | 30.2 | 31.0 | 30.9 | 29.9 | 29.8 | 30.3 | 29.7 | 29.2 | 27.6 | 30.2 | 28.2 | 24.4 | 30.9 | 28.7 | 0.0 | 2.3 | 0.00 |
| LCK      | 25.8 | 26.7 | 25.4 | 24.9 | 26.4 | 26.1 | 26.0 | 25.6 | 25.7 | 25.3 | 25.7 | 25.2 | 26.0 | 25.4 | 24.2 | 24.5 | 22.8 | 21.9 | NaN  | NaN  | 25.7 | 23.5 | 0.0 | 2.2 | 0.00 |
| MDN1     | 32.0 | 31.5 | 30.7 | 31.7 | 31.4 | 31.5 | 31.0 | 31.1 | 31.1 | 31.6 | 31.0 | 31.5 | 31.4 | 31.3 | 30.4 | 27.9 | 29.1 | 29.2 | 30.3 | 29.2 | 31.4 | 29.2 | 0.0 | 2.2 | 0.00 |
| EPPK1    | 28.6 | 27.7 | 27.1 | 28.2 | 27.8 | 28.4 | 28.5 | 28.7 | 27.3 | 29.0 | 28.2 | 27.6 | 26.6 | 27.2 | 25.8 | 25.8 | 26.6 | 24.4 | 27.8 | 24.5 | 28.0 | 25.8 | 0.0 | 2.2 | 0.00 |
| KLHL7    | 26.4 | 27.1 | 26.4 | 27.0 | 26.7 | 27.0 | 26.4 | 26.9 | 26.8 | 26.9 | 26.2 | 26.9 | 26.0 | 26.8 | 25.6 | 24.0 | 24.0 | 25.9 | 25.3 | 22.9 | 26.8 | 24.6 | 0.0 | 2.2 | 0.00 |
| CD2AP    | 28.1 | 27.9 | 27.2 | 27.8 | 28.2 | 28.6 | 28.1 | 28.1 | 28.1 | 28.0 | 27.7 | 27.5 | 27.6 | 28.2 | 27.2 | 25.2 | 25.9 | 25.9 | 26.6 | 24.7 | 28.0 | 25.9 | 0.0 | 2.2 | 0.00 |
| BEND3    | 26.5 | 27.2 | 27.5 | 27.0 | 26.4 | 26.6 | 26.5 | 27.0 | 26.7 | 26.9 | 26.8 | 27.0 | 26.6 | 26.8 | 26.6 | 24.1 | 23.8 | 25.8 | 25.3 | 23.8 | 26.8 | 24.7 | 0.0 | 2.1 | 0.00 |
| GFPT2    | 27.6 | 27.9 | 27.6 | 28.2 | 28.4 | 28.1 | 28.1 | 28.1 | 27.8 | 28.0 | 27.7 | 28.0 | 28.1 | 27.8 | 27.4 | 24.1 | 25.9 | 26.8 | 25.9 | NaN  | 28.0 | 25.9 | 0.0 | 2.1 | 0.00 |
| TTK      | 27.0 | 27.1 | 26.5 | 27.1 | 27.2 | 26.9 | 26.7 | 27.3 | 26.9 | 27.6 | 26.7 | 27.4 | 26.5 | 26.8 | 26.5 | 24.3 | 24.5 | 25.2 | 25.9 | 24.2 | 27.0 | 24.8 | 0.0 | 2.1 | 0.00 |
| ITPK1    | 26.4 | 26.8 | 27.5 | 26.5 | 27.4 | 27.2 | 26.6 | 27.5 | 26.2 | 27.3 | 27.1 | 27.5 | 26.2 | 26.6 | 26.0 | 24.9 | 24.6 | 24.9 | 24.8 | 24.6 | 26.9 | 24.9 | 0.0 | 2.1 | 0.00 |
| PLS1     | 27.2 | 27.6 | 27.1 | 27.2 | 27.9 | 27.7 | 27.7 | 27.6 | 27.8 | 27.5 | 27.0 | 27.1 | 26.8 | 27.3 | 26.0 | 22.8 | 25.3 | 24.6 | 25.4 | 26.0 | 27.4 | 25.3 | 0.0 | 2.1 | 0.00 |
| HOOK1    | 24.1 | 24.0 | 24.3 | 25.0 | 25.2 | 24.6 | 24.6 | 24.9 | 24.9 | 24.5 | 24.4 | 23.4 | 24.3 | 23.8 | 23.0 | NaN  | 22.5 | NaN  | 21.9 | NaN  | 24.4 | 22.5 | 0.0 | 1.9 | 0.00 |
| ARG2     | 27.7 | 28.2 | 27.6 | 28.4 | 28.1 | 28.1 | 27.7 | 28.1 | 28.2 | 27.8 | 27.7 | 28.5 | 26.3 | 27.4 | 26.6 | NaN  | 26.0 | 26.0 | 25.5 | NaN  | 27.9 | 26.0 | 0.0 | 1.9 | 0.00 |
| UGP2     | 33.0 | 32.9 | 32.9 | 33.3 | 33.0 | 33.4 | 33.3 | 33.1 | 33.3 | 33.0 | 32.7 | 32.6 | 33.0 | 32.9 | 31.7 | 30.9 | 30.8 | 31.3 | 31.3 | 30.6 | 33.0 | 31.1 | 0.0 | 1.9 | 0.00 |
| TIPIN    | 24.0 | 24.7 | 21.5 | 19.6 | 22.2 | 21.0 | 22.2 | 24.0 | NaN  | 21.0 | 23.1 | 23.1 | 23.9 | 23.8 | 22.4 | 21.5 | 21.2 | NaN  | 20.9 | 20.7 | 23.1 | 21.2 | 0.0 | 1.9 | 0.00 |
| SORL1    | 27.1 | 26.0 | 26.1 | 26.4 | 25.9 | 25.9 | 26.6 | 26.1 | 25.8 | 26.6 | 26.0 | 26.0 | 25.9 | 26.4 | 24.7 | NaN  | 24.0 | NaN  | 23.4 | 24.3 | 26.0 | 24.1 | 0.0 | 1.9 | 0.00 |
| CTSC     | 31.1 | 30.7 | 30.9 | 30.6 | 30.8 | 30.8 | 31.2 | 31.1 | 31.1 | 31.1 | 30.7 | 31.1 | 30.9 | 30.8 | 30.6 | 28.7 | 28.2 | 29.9 | 29.4 | 28.7 | 30.9 | 29.1 | 0.0 | 1.9 | 0.00 |
| FRAS1    | 26.0 | 25.7 | 25.1 | 26.0 | 25.9 | 25.7 | 26.0 | 25.6 | 25.7 | 25.4 | 25.5 | 25.7 | 24.9 | 25.8 | 25.0 | 23.3 | 23.8 | 23.9 | 24.3 | 22.8 | 25.7 | 23.8 | 0.0 | 1.8 | 0.00 |
| SLC16A1  | 29.9 | 29.7 | 30.0 | 30.1 | 29.6 | 29.0 | 29.9 | 29.2 | 29.8 | 29.8 | 29.8 | 29.6 | 29.9 | 29.8 | 29.1 | 27.6 | 28.1 | 28.2 | 27.7 | 27.5 | 29.8 | 27.9 | 0.0 | 1.8 | 0.00 |
| MID1IP1  | 26.9 | 27.5 | 26.8 | 27.1 | 27.0 | 27.3 | 26.7 | 27.7 | 27.0 | 27.2 | 26.6 | 27.2 | 26.4 | 27.2 | 26.3 | 22.5 | 24.4 | 25.3 | 25.2 | NaN  | 27.0 | 25.2 | 0.0 | 1.8 | 0.00 |
| SAMHD1   | 27.3 | 27.3 | 27.0 | 26.7 | 26.0 | 26.4 | 27.4 | 27.1 | 26.9 | 26.6 | 26.2 | 26.3 | 27.2 | 26.5 | 26.0 | 25.2 | 25.8 | 24.8 | 23.8 | 23.5 | 26.8 | 25.0 | 0.0 | 1.8 | 0.00 |
| GULP1    | 26.5 | 27.4 | 26.2 | 27.6 | 26.8 | 27.0 | 26.4 | 26.9 | 26.7 | 26.3 | 25.6 | 26.8 | 25.2 | 26.9 | 25.3 | 23.7 | 23.3 | 25.6 | 24.9 | 25.0 | 26.7 | 24.9 | 0.0 | 1.8 | 0.00 |
| PLK1     | 28.6 | 28.3 | 28.2 | 28.4 | 28.4 | 29.1 | 28.4 | 28.4 | 28.7 | 28.5 | 28.3 | 28.1 | 28.0 | 28.6 | 27.7 | 24.6 | 26.2 | 27.2 | 26.9 | 24.1 | 28.4 | 26.5 | 0.0 | 1.8 | 0.00 |
| NQO2     | 27.1 | 27.1 | 26.1 | 25.4 | 27.4 | 29.5 | 29.0 | 28.8 | 26.8 | 26.4 | 26.8 | 25.5 | 27.1 | 27.1 | 26.0 | 25.6 | 26.4 | 24.6 | 24.1 | 25.0 | 27.1 | 25.3 | 0.0 | 1.8 | 0.00 |
| CTSV     | 26.0 | 25.8 | 25.8 | 26.4 | 25.2 | 24.9 | 26.0 | 25.2 | 26.6 | 25.7 | 25.0 | 26.2 | 25.2 | 25.1 | 24.4 | 24.0 | 21.8 | 24.7 | 22.7 | NaN  | 25.8 | 24.0 | 0.0 | 1.8 | 0.00 |
| HIST1H1A | 29.5 | 22.2 | 22.2 | 28.7 | 27.4 | 27.4 | 29.8 | 28.9 | 24.9 | 25.2 | 24.8 | 23.1 | 23.6 | 24.1 | NaN  | 23.0 | NaN  | NaN  | NaN  | 23.6 | 25.1 | 23.3 | 0.0 | 1.8 | 0.00 |
| HELLS    | 30.1 | 29.9 | 29.3 | 30.0 | 29.9 | 30.5 | 29.9 | 29.8 | 29.8 | 29.8 | 29.7 | 30.0 | 29.1 | 29.8 | 29.3 | 27.4 | 27.8 | 28.4 | 28.5 | 26.7 | 29.9 | 28.1 | 0.0 | 1.8 | 0.00 |
| ARAP1    | 27.1 | 27.2 | 26.2 | 26.6 | 26.6 | 27.4 | 26.6 | 26.9 | 26.4 | 27.1 | 26.4 | 26.5 | 26.5 | 26.6 | 26.2 | 24.5 | 25.7 | 25.1 | 23.9 | 24.4 | 26.6 | 24.8 | 0.0 | 1.8 | 0.00 |
| RRAS2    | 29.1 | 28.9 | 28.5 | 29.4 | 28.5 | 28.7 | 28.8 | 29.0 | 28.7 | 28.9 | 28.6 | 29.0 | 29.1 | 29.1 | 27.7 | 25.9 | 26.4 | 27.8 | 27.5 | 26.8 | 28.9 | 27.1 | 0.0 | 1.8 | 0.00 |

|          |      |      |      |      |      |      |      |      |      |      |      |      |      |      |      |      |      |      |      |      |      |      |     |      |      |
|----------|------|------|------|------|------|------|------|------|------|------|------|------|------|------|------|------|------|------|------|------|------|------|-----|------|------|
| MTHFS    | 23.4 | 25.2 | 21.3 | 23.8 | 24.0 | 23.6 | 24.5 | 24.6 | 23.4 | 22.3 | 21.9 | 24.6 | 22.4 | 26.0 | 22.1 | 20.7 | 21.7 | 22.5 | 22.4 | 21.3 | 23.7 | 21.9 | 0.0 | 1.8  | 0.00 |
| HSD11B2  | 26.6 | 26.9 | 24.8 | 23.8 | 25.7 | 24.7 | 25.4 | 26.1 | 25.4 | 24.8 | 25.0 | 26.4 | 25.4 | 26.1 | 24.2 | NaN  | 23.7 | NaN  | 22.8 | NaN  | 25.4 | 23.7 | 0.0 | 1.8  | 0.00 |
| HIGD1A   | 26.2 | 26.1 | 26.3 | 26.3 | 27.9 | 28.3 | 26.2 | 25.8 | 26.8 | 25.0 | 25.5 | 26.4 | 24.9 | 26.1 | 25.9 | 24.8 | 26.2 | 24.1 | 23.9 | 22.5 | 26.2 | 24.4 | 0.0 | 1.8  | 0.00 |
| BCAM     | 27.2 | 27.3 | 26.7 | 27.7 | 27.8 | 27.6 | 27.0 | 26.9 | 27.3 | 27.1 | 26.4 | 27.4 | 27.0 | 27.0 | 26.2 | NaN  | NaN  | 24.6 | 25.1 | 25.7 | 27.1 | 25.4 | 0.0 | 1.7  | 0.00 |
| TJP2     | 29.4 | 29.3 | 28.6 | 29.1 | 30.0 | 29.3 | 29.4 | 29.3 | 28.9 | 29.0 | 28.6 | 28.6 | 28.3 | 29.3 | 28.1 | 26.2 | 27.1 | 27.4 | 28.1 | 27.6 | 29.2 | 27.5 | 0.0 | 1.7  | 0.00 |
| HACL1    | 28.0 | 27.2 | 27.7 | 28.2 | 28.0 | 28.2 | 27.8 | 27.8 | 27.6 | 27.7 | 27.4 | 28.1 | 27.7 | 27.7 | 27.0 | 24.2 | 24.8 | 26.1 | 26.5 | 26.0 | 27.8 | 26.1 | 0.0 | 1.7  | 0.00 |
| AURKB    | 27.3 | 28.0 | 26.8 | 26.6 | 27.4 | 27.2 | 26.5 | 27.7 | 27.2 | 27.5 | 27.3 | 27.1 | 26.9 | 27.5 | 26.7 | 24.3 | 25.7 | 25.4 | 26.0 | 24.6 | 27.2 | 25.5 | 0.0 | 1.7  | 0.00 |
| GOLM1    | 26.7 | 26.6 | 26.8 | 27.6 | 27.1 | 27.3 | 27.1 | 26.7 | 26.6 | 27.1 | 26.4 | 27.0 | 26.1 | 26.6 | 25.6 | 25.2 | 24.8 | 26.0 | 25.0 | 24.7 | 26.7 | 25.1 | 0.0 | 1.7  | 0.00 |
| INCENP   | 26.3 | 26.0 | 25.5 | 26.1 | 25.4 | 24.3 | 25.8 | 25.8 | 25.7 | 26.5 | 26.6 | 25.3 | 25.5 | 26.3 | 25.7 | 23.1 | 23.9 | 24.4 | 25.2 | 22.9 | 25.8 | 24.2 | 0.0 | 1.6  | 0.00 |
| ABRACL   | 29.6 | 28.5 | 29.2 | 27.9 | 28.7 | 28.4 | 29.7 | 29.9 | 29.5 | 29.4 | 28.7 | 29.4 | 29.1 | 29.6 | 28.7 | 27.3 | 27.5 | 27.8 | 28.6 | 26.7 | 29.3 | 27.6 | 0.0 | 1.6  | 0.00 |
| SLC9A3R1 | 29.9 | 29.7 | 29.3 | 30.1 | 29.8 | 29.7 | 29.9 | 30.1 | 29.9 | 29.7 | 29.7 | 29.3 | 29.3 | 29.8 | 29.1 | 28.1 | 27.9 | 28.9 | 28.2 | 26.5 | 29.8 | 28.1 | 0.0 | 1.6  | 0.00 |
| TOP2A    | 32.1 | 31.9 | 31.8 | 32.1 | 32.0 | 32.0 | 31.9 | 31.8 | 32.0 | 32.3 | 32.1 | 32.0 | 31.9 | 31.9 | 31.5 | 30.0 | 30.0 | 31.0 | 30.7 | 29.4 | 32.0 | 30.3 | 0.0 | 1.6  | 0.00 |
| Mar-01   | 25.2 | 25.1 | 25.5 | 26.3 | 24.3 | 25.7 | 25.5 | 25.2 | 25.6 | 25.4 | 24.8 | 26.5 | 24.8 | 25.5 | 24.4 | 23.8 | 24.5 | 23.3 | 23.8 | NaN  | 25.4 | 23.8 | 0.0 | 1.6  | 0.00 |
| LLGL2    | 25.4 | 25.3 | 23.0 | 25.4 | 25.1 | 25.3 | 25.0 | 25.1 | 25.3 | 24.8 | 24.7 | 25.7 | 24.6 | 24.9 | 23.7 | NaN  | NaN  | NaN  | 23.3 | NaN  | 25.1 | 23.5 | 0.0 | 1.6  | 0.00 |
| SEPHS1   | 30.6 | 31.2 | 31.3 | 30.8 | 31.0 | 31.0 | 31.0 | 31.5 | 31.1 | 31.0 | 30.9 | 30.8 | 31.2 | 30.6 | 30.6 | 28.9 | 29.3 | 29.5 | 30.0 | 29.3 | 31.0 | 29.4 | 0.0 | 1.6  | 0.00 |
| L2HGDH   | 27.3 | 27.0 | 26.6 | 27.1 | 26.5 | 26.7 | 26.9 | 26.9 | 27.4 | 26.9 | 27.2 | 27.2 | 27.5 | 27.0 | 26.8 | 25.3 | 25.4 | 25.2 | 25.5 | 26.2 | 27.0 | 25.4 | 0.0 | 1.6  | 0.00 |
| SLC27A3  | 25.8 | 25.4 | 24.6 | 24.8 | 25.3 | 25.9 | 24.3 | 25.2 | 25.4 | 25.4 | 24.3 | 25.3 | 24.1 | 25.4 | 24.6 | 24.0 | 22.6 | 23.8 | 23.1 | 23.6 | 25.3 | 23.7 | 0.0 | 1.6  | 0.00 |
| GJA1     | 29.5 | 29.2 | 29.0 | 29.5 | 29.5 | 29.4 | 29.4 | 29.1 | 29.5 | 29.6 | 29.3 | 29.3 | 28.8 | 29.5 | 29.0 | 27.5 | 27.6 | 28.9 | 28.1 | 26.4 | 29.4 | 27.8 | 0.0 | 1.6  | 0.00 |
| FLVCR1   | 24.3 | 25.2 | 25.6 | 24.8 | 25.2 | 25.8 | 25.2 | 25.2 | 25.3 | 25.4 | 25.7 | 25.0 | 24.9 | 24.6 | 24.5 | 23.8 | 24.3 | 23.1 | 23.5 | 23.6 | 25.2 | 23.7 | 0.0 | 1.6  | 0.00 |
| SLC38A2  | 27.9 | 28.0 | 27.2 | 28.2 | 28.2 | 28.2 | 27.4 | 27.8 | 28.0 | 27.8 | 27.6 | 28.0 | 26.3 | 27.9 | 26.9 | 25.5 | 25.8 | 27.5 | 27.0 | 23.2 | 27.9 | 26.3 | 0.0 | 1.6  | 0.00 |
| DLGAP5   | 28.2 | 28.3 | 27.7 | 27.8 | 28.6 | 29.0 | 28.2 | 28.5 | 28.1 | 28.5 | 28.2 | 27.3 | 28.0 | 28.4 | 27.6 | 24.9 | 26.6 | 26.7 | 26.7 | 22.3 | 28.2 | 26.6 | 0.0 | 1.6  | 0.00 |
| ZNF462   | 28.0 | 27.9 | 26.9 | 27.2 | 27.9 | 28.2 | 27.6 | 27.6 | 27.6 | 27.8 | 27.9 | 27.1 | 27.3 | 27.9 | 27.4 | 25.9 | 26.3 | 26.2 | 26.1 | 22.1 | 27.7 | 26.2 | 0.0 | 1.5  | 0.00 |
| PARD6B   | 25.9 | 24.9 | 25.6 | 25.7 | 26.2 | 25.8 | 26.3 | 25.8 | 25.6 | 26.1 | 25.6 | 25.7 | 26.1 | 25.6 | 25.2 | NaN  | 22.8 | 24.3 | 24.1 | NaN  | 25.7 | 24.2 | 0.0 | 1.5  | 0.00 |
| SKA3     | 25.9 | 25.6 | 24.6 | 25.0 | 25.8 | 25.3 | 25.2 | 26.0 | 25.3 | 26.1 | 25.9 | 25.4 | 23.9 | 25.7 | 25.7 | 23.4 | 22.7 | 24.0 | 24.0 | NaN  | 25.5 | 24.0 | 0.0 | 1.5  | 0.00 |
| AMT      | 25.5 | 24.6 | 24.7 | 25.7 | 25.1 | 24.9 | 25.5 | 24.5 | 25.2 | 24.5 | 24.9 | 25.7 | 24.2 | 24.8 | 24.3 | 23.1 | 23.4 | 23.9 | 22.8 | NaN  | 24.9 | 23.4 | 0.0 | 1.5  | 0.00 |
| KCTD14   | 24.6 | 24.8 | 25.0 | 25.5 | 24.5 | 24.8 | 25.6 | 25.0 | 24.9 | 24.7 | 24.8 | 24.9 | 24.8 | 24.7 | 23.4 | NaN  | NaN  | 23.3 | 23.3 | NaN  | 24.8 | 23.3 | 0.0 | 1.5  | 0.00 |
| VASP     | 29.2 | 28.6 | 28.8 | 28.4 | 28.9 | 29.0 | 29.3 | 28.5 | 28.9 | 29.3 | 28.7 | 28.3 | 28.5 | 29.2 | 28.3 | 27.5 | 27.2 | 28.3 | 27.3 | 26.3 | 28.9 | 27.4 | 0.0 | 1.5  | 0.00 |
| HMGA1    | 31.4 | 31.5 | 31.4 | 32.3 | 32.0 | 32.2 | 31.6 | 30.9 | 31.8 | 31.6 | 32.1 | 31.4 | 31.8 | 31.9 | 31.6 | 28.1 | 30.3 | 31.0 | 30.1 | 27.7 | 31.7 | 30.2 | 0.0 | 1.5  | 0.00 |
| CDC20    | 26.2 | 26.0 | 26.2 | 26.0 | 26.3 | 26.0 | 25.7 | 25.4 | 26.0 | 26.7 | 26.2 | 26.5 | 25.1 | 25.5 | 26.0 | NaN  | 24.1 | 24.6 | 24.6 | 23.7 | 26.0 | 24.6 | 0.0 | 1.5  | 0.00 |
| OAT      | 31.9 | 31.5 | 31.5 | 31.4 | 31.6 | 31.4 | 32.2 | 32.1 | 31.6 | 31.7 | 31.7 | 31.6 | 31.4 | 32.1 | 31.0 | 29.9 | 30.8 | 30.3 | 30.0 | 30.0 | 31.6 | 30.2 | 0.0 | 1.5  | 0.00 |
| RIF1     | 29.2 | 29.5 | 29.3 | 28.9 | 28.8 | 29.2 | 29.5 | 29.5 | 29.2 | 29.3 | 28.8 | 28.9 | 28.6 | 29.2 | 28.9 | 26.4 | 27.4 | 27.9 | 28.8 | 27.6 | 29.2 | 27.7 | 0.0 | 1.5  | 0.00 |
| CBR1     | 31.2 | 31.1 | 30.1 | 30.7 | 30.2 | 30.5 | 30.9 | 30.9 | 30.3 | 31.0 | 30.7 | 29.5 | 30.8 | 31.0 | 29.1 | 29.1 | 29.5 | 28.8 | 29.9 | 29.9 | 30.8 | 29.3 | 0.0 | 1.4  | 0.00 |
| DNMT3A   | 30.1 | 29.6 | 29.8 | 29.5 | 29.9 | 29.3 | 29.3 | 29.5 | 29.6 | 29.9 | 29.7 | 30.3 | 29.7 | 30.0 | 29.6 | 28.3 | 28.2 | 28.2 | 28.3 | 28.0 | 29.7 | 28.3 | 0.0 | 1.4  | 0.00 |
| MGME1    | 27.4 | 27.5 | 26.8 | 27.3 | 26.9 | 27.1 | 27.0 | 27.6 | 27.3 | 27.4 | 26.7 | 27.5 | 26.6 | 27.3 | 26.8 | 25.2 | 26.1 | 25.6 | 26.1 | 25.3 | 27.3 | 25.8 | 0.0 | 1.4  | 0.00 |
| FKBP11   | 26.4 | 27.2 | 25.7 | 27.3 | 26.9 | 26.5 | 26.5 | 27.1 | 27.0 | 26.5 | 26.3 | 27.3 | NaN  | 26.5 | 23.8 | 25.1 | 26.2 | NaN  | 25.0 | 26.3 | 26.5 | 25.1 | 0.0 | 1.4  | 0.00 |
| AKAP1    | 27.4 | 27.0 | 25.6 | 27.1 | 27.8 | 27.6 | 27.0 | 27.2 | 27.7 | 27.2 | 27.1 | 25.8 | 26.4 | 27.5 | 26.1 | 25.7 | 25.4 | 26.0 | 24.4 | NaN  | 27.1 | 25.7 | 0.0 | 1.4  | 0.00 |
| UNG      | 25.6 | 25.8 | 26.4 | 26.7 | 26.1 | 26.7 | 26.2 | 26.2 | 26.6 | 26.3 | 26.2 | 26.9 | 25.7 | 25.9 | 26.3 | 23.8 | 24.1 | 25.6 | 25.4 | 23.9 | 26.2 | 24.8 | 0.0 | 1.4  | 0.00 |
| NACC1    | 27.8 | 27.9 | 27.6 | 28.3 | 28.0 | 28.7 | 27.9 | 27.7 | 27.8 | 27.9 | 27.5 | 27.6 | 27.8 | 27.3 | 26.0 | 25.4 | 27.1 | 26.6 | 26.3 | 27.9 | 26.4 | 0.0  | 1.4 | 0.00 |      |
| RRM2B    | 26.8 | 26.1 | 26.8 | 26.4 | 25.2 | 25.4 | 26.8 | 26.9 | 26.2 | 26.6 | 26.5 | 26.4 | 26.8 | 26.0 | 25.2 | 24.5 | 24.5 | 25.6 | 25.7 | 24.9 | 26.5 | 25.0 | 0.0 | 1.4  | 0.00 |
| NSUN5    | 27.0 | 27.2 | 26.9 | 27.5 | 27.5 | 27.5 | 26.9 | 27.0 | 27.2 | 26.9 | 26.9 | 27.6 | 26.8 | 26.9 | 26.6 | 24.1 | 25.4 | 25.7 | 26.4 | 25.5 | 27.0 | 25.6 | 0.0 | 1.4  | 0.00 |
| ITGA6    | 28.4 | 28.5 | 29.3 | 28.9 | 28.5 | 28.3 | 28.3 | 28.4 | 28.7 | 28.9 | 28.7 | 28.9 | 28.4 | 28.2 | 28.1 | 27.3 | 26.0 | 27.8 | 26.9 | 26.7 | 28.5 | 27.1 | 0.0 | 1.4  | 0.00 |
| ESRP1    | 29.4 | 29.3 | 29.1 | 29.2 | 29.4 | 29.3 | 29.3 | 29.3 | 29.4 | 28.9 | 28.8 | 29.4 | 29.0 | 29.1 | 27.9 | 28.1 | 28.0 | 27.7 | 27.7 | 27.8 | 29.3 | 27.9 | 0.0 | 1.4  | 0.00 |

|          |      |      |      |      |      |      |      |      |      |      |      |      |      |      |      |      |      |      |      |      |      |      |     |     |      |
|----------|------|------|------|------|------|------|------|------|------|------|------|------|------|------|------|------|------|------|------|------|------|------|-----|-----|------|
| RAB3B    | 27.4 | 26.8 | 27.4 | 27.7 | 26.9 | 27.3 | 27.7 | 26.9 | 27.4 | 27.2 | 27.0 | 27.2 | 27.2 | 27.1 | 26.0 | 25.9 | 25.6 | 26.3 | 25.7 | 24.0 | 27.2 | 25.8 | 0.0 | 1.4 | 0.00 |
| SLC2A1   | 29.7 | 29.8 | 29.3 | 29.6 | 30.0 | 29.7 | 29.2 | 29.6 | 29.2 | 29.7 | 29.9 | 30.0 | 29.5 | 30.3 | 29.3 | 27.5 | 26.8 | 29.1 | 29.1 | 27.1 | 29.7 | 28.3 | 0.0 | 1.4 | 0.00 |
| NPM3     | 29.6 | 29.4 | 28.9 | 29.5 | 30.2 | 30.5 | 29.5 | 29.0 | 29.8 | 29.7 | 29.4 | 29.2 | 29.1 | 29.5 | 29.2 | 27.2 | 29.2 | 27.8 | 27.7 | 28.4 | 29.5 | 28.1 | 0.0 | 1.4 | 0.00 |
| GNL3L    | 26.6 | 26.0 | 26.2 | 27.1 | 26.8 | 26.6 | 26.4 | 26.2 | 26.7 | 26.5 | 26.4 | 26.0 | 25.9 | 26.7 | 25.9 | 25.1 | 25.1 | 25.1 | 24.9 | 25.1 | 26.5 | 25.1 | 0.0 | 1.4 | 0.00 |
| BSG      | 31.1 | 31.0 | 31.4 | 31.5 | 30.7 | 30.4 | 31.0 | 30.9 | 31.0 | 31.2 | 30.9 | 31.2 | 30.8 | 31.1 | 30.5 | 29.0 | 29.6 | 29.6 | 29.6 | 29.0 | 31.0 | 29.6 | 0.0 | 1.4 | 0.00 |
| ANK3     | 27.8 | 27.9 | 26.9 | 27.2 | 27.8 | 27.8 | 27.9 | 28.4 | 27.6 | 26.9 | 26.8 | 26.9 | 27.3 | 27.6 | 26.8 | 26.3 | 26.6 | 26.1 | 25.5 | 25.3 | 27.6 | 26.2 | 0.0 | 1.4 | 0.00 |
| KIAA0391 | 26.8 | 27.4 | 26.4 | 25.7 | 26.9 | 26.5 | 26.7 | 27.2 | 26.4 | 26.5 | 26.7 | 26.8 | 26.6 | 26.6 | 25.7 | 24.7 | 26.0 | 24.9 | 24.7 | 25.8 | 26.7 | 25.3 | 0.0 | 1.4 | 0.00 |
| ZNF281   | 25.5 | 25.9 | 25.8 | 26.4 | 26.8 | 26.1 | 25.5 | 25.1 | 26.2 | 26.2 | 26.0 | 25.8 | 25.4 | 25.6 | 25.4 | 24.0 | 24.1 | 24.5 | 24.8 | NaN  | 25.9 | 24.5 | 0.0 | 1.4 | 0.00 |
| SLC39A14 | 27.9 | 28.0 | 28.1 | 28.8 | 27.8 | 28.0 | 27.5 | 27.8 | 27.6 | 28.1 | 27.6 | 28.6 | 26.9 | 27.7 | 26.9 | NaN  | 25.3 | 26.6 | 26.5 | 24.4 | 27.9 | 26.5 | 0.0 | 1.4 | 0.00 |
| KIF2C    | 28.9 | 28.9 | 28.4 | 28.6 | 28.9 | 28.8 | 29.0 | 29.1 | 29.0 | 29.1 | 28.9 | 28.3 | 28.8 | 28.9 | 28.4 | 26.6 | 27.4 | 27.8 | 27.6 | 26.0 | 28.9 | 27.5 | 0.0 | 1.3 | 0.01 |
| CPVL     | 27.1 | 26.6 | 26.4 | 27.1 | 27.2 | 27.4 | 27.5 | 27.2 | 26.7 | 26.7 | 26.5 | 27.1 | 26.8 | 26.6 | 26.4 | 25.6 | 26.2 | 25.6 | 25.0 | 24.2 | 26.9 | 25.6 | 0.0 | 1.3 | 0.01 |
| BAZ2A    | 28.8 | 29.3 | 28.9 | 27.7 | 30.0 | 30.0 | 29.0 | 28.6 | 29.7 | 28.7 | 28.9 | 29.0 | 28.3 | 29.0 | 28.6 | 27.9 | 28.9 | 27.0 | 27.4 | 27.1 | 29.0 | 27.6 | 0.0 | 1.3 | 0.01 |
| PWWP2A   | 24.8 | 24.0 | 24.4 | 25.1 | 25.0 | 25.1 | 24.6 | 24.7 | 24.2 | 23.9 | 24.7 | 24.4 | 23.7 | 23.8 | 23.7 | 23.0 | NaN  | 23.3 | 22.6 | NaN  | 24.5 | 23.2 | 0.0 | 1.3 | 0.01 |
| TGIF1    | 24.3 | 24.5 | 23.7 | 24.3 | 23.4 | 23.5 | 23.6 | 24.4 | 24.4 | 24.3 | 23.6 | 24.1 | 24.0 | 23.8 | 23.3 | 23.2 | 22.1 | 22.7 | 22.6 | NaN  | 24.0 | 22.7 | 0.0 | 1.3 | 0.01 |
| TRMT1    | 27.1 | 27.9 | 27.0 | 27.9 | 28.3 | 27.9 | 27.3 | 27.6 | 27.8 | 27.1 | 27.3 | 27.6 | 27.6 | 27.6 | 27.3 | 25.9 | 26.8 | 26.4 | 26.2 | 26.1 | 27.6 | 26.3 | 0.0 | 1.3 | 0.01 |
| ALDH1B1  | 29.6 | 29.6 | 29.3 | 30.4 | 30.1 | 30.1 | 29.9 | 29.8 | 29.7 | 29.4 | 29.1 | 29.8 | 29.4 | 29.7 | 29.1 | 28.3 | 29.3 | 28.5 | 28.3 | 27.5 | 29.7 | 28.4 | 0.0 | 1.3 | 0.01 |
| CRABP2   | 28.7 | 28.5 | 27.5 | 28.6 | 28.6 | 28.9 | 28.9 | 28.7 | 28.7 | 28.9 | 28.7 | 28.0 | 28.8 | 28.6 | 29.2 | 27.1 | 27.9 | 27.7 | 26.9 | 26.1 | 28.7 | 27.4 | 0.0 | 1.3 | 0.01 |
| CEBPZ    | 29.3 | 29.3 | 29.4 | 29.3 | 29.1 | 28.7 | 29.2 | 28.9 | 29.4 | 29.4 | 29.1 | 29.2 | 28.9 | 29.0 | 29.1 | 26.8 | 27.8 | 28.1 | 28.0 | 27.8 | 29.2 | 27.9 | 0.0 | 1.3 | 0.01 |
| CBS      | 32.1 | 32.1 | 32.1 | 32.0 | 32.6 | 32.4 | 32.1 | 32.2 | 32.4 | 31.9 | 32.0 | 31.9 | 32.1 | 32.0 | 31.5 | 29.6 | 30.8 | 30.8 | 30.8 | 29.4 | 32.1 | 30.8 | 0.0 | 1.3 | 0.01 |
| PDK3     | 26.1 | 26.4 | 25.3 | 25.6 | 25.0 | 25.2 | 26.0 | 26.5 | 25.5 | 25.7 | 25.7 | 26.0 | 25.8 | 24.8 | 25.4 | 23.6 | 24.8 | 23.9 | 24.4 | NaN  | 25.7 | 24.4 | 0.0 | 1.3 | 0.01 |
| LPCAT1   | 29.6 | 29.3 | 29.3 | 29.2 | 29.1 | 29.1 | 29.3 | 29.5 | 29.4 | 29.3 | 29.1 | 29.4 | 28.8 | 29.5 | 28.6 | 28.3 | 27.7 | 28.5 | 27.7 | 27.1 | 29.3 | 28.0 | 0.0 | 1.3 | 0.01 |
| SLC3A2   | 31.8 | 31.9 | 31.3 | 33.2 | 32.3 | 31.8 | 31.8 | 32.5 | 32.2 | 31.7 | 31.5 | 32.6 | 31.3 | 32.3 | 31.5 | 29.8 | 30.8 | 31.0 | 30.4 | 28.9 | 31.9 | 30.6 | 0.0 | 1.3 | 0.01 |
| KPNA2    | 32.6 | 32.5 | 32.7 | 32.6 | 32.9 | 33.0 | 32.6 | 32.6 | 32.8 | 32.6 | 32.5 | 32.6 | 32.3 | 32.4 | 32.1 | 30.6 | 30.8 | 31.8 | 31.8 | 30.2 | 32.6 | 31.3 | 0.0 | 1.3 | 0.01 |
| SLC25A29 | 26.7 | 26.9 | 26.8 | 25.5 | 26.3 | 25.8 | 26.2 | 26.5 | 26.7 | 26.2 | 26.2 | 27.7 | 24.9 | 26.3 | 25.9 | 25.0 | 25.0 | 24.4 | 26.0 | 24.9 | 26.3 | 25.0 | 0.0 | 1.3 | 0.01 |
| ALDH4A1  | 28.1 | 28.4 | 28.4 | 28.2 | 28.5 | 28.7 | 28.0 | 28.2 | 28.5 | 28.1 | 27.8 | 28.4 | 28.2 | 28.4 | 28.0 | 27.3 | 26.4 | 27.0 | 26.6 | 27.0 | 28.3 | 27.0 | 0.0 | 1.3 | 0.01 |
| HMOX1    | 25.9 | 26.3 | 28.0 | 27.2 | 26.8 | 26.6 | 26.0 | 26.3 | 26.4 | 26.8 | 26.5 | 27.5 | 25.2 | 26.3 | 26.9 | 22.9 | 24.8 | 26.0 | 25.2 | 25.2 | 26.5 | 25.2 | 0.0 | 1.3 | 0.01 |
| CCNB1    | 28.6 | 28.8 | 28.6 | 28.9 | 29.0 | 29.2 | 28.6 | 28.4 | 28.7 | 28.5 | 28.5 | 28.8 | 28.4 | 28.6 | 28.5 | 26.6 | 26.9 | 28.3 | 27.9 | 26.0 | 28.6 | 27.4 | 0.0 | 1.3 | 0.01 |
| TGS1     | 24.4 | 25.1 | 23.9 | 24.8 | 24.2 | 25.5 | 24.2 | 25.6 | 24.8 | 25.1 | 25.0 | 24.6 | 25.0 | 24.9 | 24.8 | 22.9 | 23.6 | 23.5 | NaN  | 24.1 | 24.8 | 23.6 | 0.0 | 1.2 | 0.01 |
| ACSL4    | 29.3 | 29.4 | 29.4 | 29.5 | 28.9 | 28.4 | 28.8 | 29.6 | 28.8 | 29.5 | 29.3 | 29.5 | 28.9 | 29.0 | 28.3 | 27.3 | 27.8 | 28.9 | 28.8 | 27.0 | 29.3 | 28.1 | 0.0 | 1.2 | 0.01 |
| SLC38A1  | 27.4 | 27.3 | 27.7 | 28.2 | 26.8 | 28.1 | 27.1 | 27.0 | 27.3 | 27.6 | 27.4 | 27.7 | 26.7 | 26.9 | 26.4 | 24.7 | 25.8 | 26.8 | 27.3 | 25.0 | 27.3 | 26.1 | 0.0 | 1.2 | 0.01 |
| ANLN     | 26.5 | 26.7 | 25.7 | 26.6 | 26.4 | 26.5 | 25.7 | 26.8 | 25.7 | 26.9 | 26.8 | 26.1 | 25.2 | 27.0 | 26.2 | 24.8 | 24.6 | 25.5 | 25.6 | 25.1 | 26.5 | 25.3 | 0.0 | 1.2 | 0.01 |
| QSER1    | 24.8 | 24.5 | 25.9 | 24.0 | 26.3 | 25.7 | 24.3 | 24.6 | 25.0 | 25.2 | 25.0 | 25.2 | 24.8 | 24.5 | 25.1 | 23.5 | 23.2 | NaN  | 23.7 | 24.1 | 24.9 | 23.7 | 0.0 | 1.2 | 0.01 |
| HERC2    | 25.2 | 25.4 | 26.2 | 25.8 | 26.1 | 25.8 | 25.9 | 25.2 | 25.4 | 25.9 | 25.5 | 26.6 | 26.1 | 25.9 | 25.0 | 24.3 | 24.2 | 25.0 | 24.1 | 24.9 | 25.8 | 24.6 | 0.0 | 1.2 | 0.01 |
| TRIM24   | 28.2 | 28.2 | 27.8 | 28.5 | 28.0 | 28.1 | 28.4 | 28.0 | 28.4 | 28.3 | 28.2 | 27.9 | 27.9 | 28.0 | 27.6 | 26.7 | 26.8 | 27.8 | 27.0 | 25.9 | 28.1 | 26.9 | 0.0 | 1.2 | 0.01 |
| TACC3    | 27.6 | 27.6 | 27.6 | 28.0 | 28.1 | 27.8 | 27.5 | 27.6 | 27.7 | 28.0 | 28.0 | 27.6 | 27.5 | 27.8 | 27.7 | 25.5 | 25.9 | 27.4 | 27.0 | 25.0 | 27.6 | 26.4 | 0.0 | 1.2 | 0.01 |
| TRIP10   | 26.0 | 25.9 | 26.1 | 25.9 | 26.0 | 26.8 | 26.1 | 26.3 | 26.5 | 26.3 | 26.1 | 26.1 | 26.4 | 26.3 | 25.7 | 25.2 | 24.6 | 25.1 | 24.8 | 24.5 | 26.1 | 24.9 | 0.0 | 1.2 | 0.01 |
| USP28    | 26.0 | 25.4 | 26.3 | 26.2 | 25.8 | 25.8 | 26.3 | 26.7 | 25.0 | 25.2 | 25.7 | 25.0 | 25.9 | 25.6 | 24.8 | NaN  | NaN  | 25.0 | 24.4 | 24.1 | 25.8 | 24.6 | 0.0 | 1.2 | 0.01 |
| EPHX1    | 29.2 | 29.1 | 28.4 | 29.2 | 28.9 | 29.2 | 29.1 | 28.9 | 28.7 | 28.8 | 28.4 | 29.2 | 28.7 | 28.9 | 27.8 | 27.6 | 28.6 | 27.9 | 27.4 | 27.1 | 28.9 | 27.7 | 0.0 | 1.2 | 0.01 |
| FGFR1OP  | 25.7 | 25.7 | 25.4 | 22.9 | 26.3 | 26.7 | 24.6 | 26.2 | 26.2 | 25.4 | 25.7 | 25.6 | 25.0 | 26.0 | 25.6 | 25.0 | 24.0 | 25.1 | 23.7 | 23.8 | 25.7 | 24.5 | 0.0 | 1.2 | 0.01 |
| KIF22    | 27.2 | 28.0 | 27.0 | 27.7 | 27.9 | 27.0 | 27.0 | 27.5 | 27.5 | 28.1 | 27.7 | 27.5 | 27.3 | 27.6 | 27.8 | 26.2 | 26.0 | 26.5 | 27.1 | 25.2 | 27.5 | 26.3 | 0.0 | 1.2 | 0.01 |
| LRBA     | 28.5 | 28.4 | 28.3 | 28.3 | 28.5 | 28.4 | 28.6 | 28.5 | 28.5 | 28.6 | 28.1 | 28.2 | 29.1 | 28.3 | 27.4 | 25.6 | 27.2 | 26.7 | 27.5 | 27.3 | 28.4 | 27.2 | 0.0 | 1.2 | 0.01 |
| PSIP1    | 31.3 | 31.2 | 31.3 | 31.0 | 30.9 | 30.9 | 31.4 | 31.3 | 31.1 | 31.4 | 31.2 | 31.2 | 31.2 | 31.2 | 31.1 | 30.1 | 30.1 | 30.0 | 29.9 | 29.4 | 31.2 | 30.0 | 0.0 | 1.2 | 0.01 |

|          |      |      |      |      |      |      |      |      |      |      |      |      |      |      |      |      |      |      |      |      |      |      |     |     |      |
|----------|------|------|------|------|------|------|------|------|------|------|------|------|------|------|------|------|------|------|------|------|------|------|-----|-----|------|
| ZIC2     | 25.5 | 26.4 | 25.8 | 26.1 | 26.8 | 26.8 | 25.6 | 25.2 | 26.3 | 26.6 | 26.3 | 26.5 | 25.7 | 25.7 | 26.1 | 25.0 | 25.1 | 25.0 | 23.9 | NaN  | 26.2 | 25.0 | 0.0 | 1.2 | 0.01 |
| PCCA     | 27.8 | 27.7 | 27.2 | 27.3 | 27.8 | 28.1 | 27.6 | 27.7 | 27.6 | 27.6 | 27.6 | 27.2 | 27.8 | 27.7 | 27.4 | 26.5 | 26.9 | 26.3 | 25.9 | 26.5 | 27.7 | 26.5 | 0.0 | 1.2 | 0.01 |
| C11orf98 | 26.6 | 26.9 | 24.9 | 25.8 | 27.5 | 27.8 | 26.0 | 26.8 | 27.3 | 25.9 | 25.9 | 26.4 | 25.8 | 27.3 | 25.9 | 25.5 | 25.7 | 24.4 | 25.1 | 24.7 | 26.5 | 25.3 | 0.0 | 1.2 | 0.01 |
| ENPP1    | 26.5 | 26.2 | 25.2 | 25.8 | 26.1 | 25.6 | 26.1 | 26.6 | 25.7 | 26.1 | 25.6 | 26.3 | 25.5 | 26.4 | 24.9 | 24.6 | NaN  | 24.2 | 25.0 | 25.6 | 26.1 | 24.9 | 0.0 | 1.2 | 0.01 |
| MTFP1    | 25.5 | 25.5 | 24.6 | 25.1 | 24.1 | 24.1 | 23.4 | 24.3 | 25.1 | 25.1 | 25.2 | 25.0 | 24.8 | 25.6 | 23.9 | NaN  | 24.4 | 23.4 | 24.1 | 23.7 | 25.0 | 23.9 | 0.0 | 1.2 | 0.01 |
| ACAD8    | 27.2 | 26.8 | 26.5 | 27.0 | 26.2 | 26.0 | 26.9 | 26.3 | 26.8 | 26.9 | 26.7 | 27.8 | 26.8 | 26.7 | 26.4 | 25.8 | 24.4 | 24.8 | 25.4 | 26.2 | 26.8 | 25.6 | 0.0 | 1.2 | 0.01 |
| GLA      | 27.1 | 27.2 | 26.6 | 26.9 | 27.0 | 27.4 | 27.5 | 27.4 | 27.2 | 27.2 | 26.6 | 27.4 | 26.9 | 26.7 | 26.3 | 25.9 | 25.9 | 25.9 | 26.1 | 26.2 | 27.2 | 26.0 | 0.0 | 1.2 | 0.01 |
| POLRMT   | 26.2 | 27.2 | 26.6 | 28.0 | 27.1 | 27.3 | 26.5 | 27.0 | 26.8 | 27.0 | 26.9 | 28.2 | 25.7 | 26.9 | 26.6 | 22.9 | 25.7 | 25.9 | 26.4 | 24.7 | 27.0 | 25.8 | 0.0 | 1.2 | 0.01 |
| FDXR     | 27.7 | 27.5 | 26.4 | 27.5 | 28.1 | 27.8 | 27.5 | 27.8 | 27.2 | 27.3 | 27.2 | 27.6 | 27.0 | 26.8 | 26.5 | 26.9 | 25.3 | 25.3 | 26.2 | 27.3 | 27.5 | 26.3 | 0.0 | 1.2 | 0.01 |
| ZFAND6   | 24.6 | 25.0 | 24.9 | 24.9 | 25.8 | 24.9 | 26.1 | 24.2 | 25.5 | 25.0 | 24.9 | 24.8 | 24.6 | 25.1 | 24.5 | 24.1 | 23.7 | 23.2 | 23.8 | 23.7 | 24.9 | 23.8 | 0.0 | 1.2 | 0.01 |
| NASP     | 33.1 | 33.0 | 33.1 | 33.1 | 33.2 | 33.2 | 33.3 | 33.2 | 33.4 | 33.2 | 33.2 | 32.9 | 33.1 | 33.0 | 33.2 | 31.4 | 31.7 | 32.3 | 32.4 | 31.7 | 33.2 | 32.0 | 0.0 | 1.2 | 0.01 |
| ABHD17B  | 25.5 | 26.2 | 25.5 | 25.9 | 26.6 | 25.8 | 25.4 | 26.5 | 25.7 | 25.8 | 25.8 | 26.0 | 25.4 | 25.3 | 25.1 | 24.6 | 24.0 | 24.7 | 24.6 | 24.4 | 25.8 | 24.6 | 0.0 | 1.1 | 0.01 |
| ERCC6L   | 26.6 | 25.9 | 26.2 | 26.3 | 26.2 | 25.9 | 26.6 | 25.6 | 26.3 | 26.5 | 26.5 | 25.3 | 26.5 | 25.8 | 25.2 | 24.1 | 25.1 | 25.5 | 25.0 | 24.1 | 26.2 | 25.1 | 0.0 | 1.1 | 0.01 |
| PRKCI    | 27.7 | 27.4 | 27.7 | 27.2 | 27.6 | 28.2 | 27.7 | 27.6 | 27.8 | 28.0 | 27.8 | 27.9 | 27.8 | 27.4 | 27.4 | 26.5 | 26.8 | 26.6 | 26.2 | 25.9 | 27.7 | 26.6 | 0.0 | 1.1 | 0.01 |
| ARFGEF1  | 28.1 | 28.3 | 27.9 | 28.2 | 28.1 | 28.2 | 28.1 | 28.4 | 28.0 | 28.1 | 28.1 | 27.9 | 27.7 | 27.8 | 27.2 | 27.0 | 27.1 | 26.8 | 26.8 | 26.3 | 28.1 | 26.9 | 0.0 | 1.1 | 0.01 |
| KIF11    | 28.9 | 29.7 | 28.6 | 29.1 | 29.2 | 29.2 | 29.0 | 29.5 | 29.1 | 29.2 | 29.2 | 29.0 | 29.0 | 29.5 | 29.0 | 27.2 | 27.8 | 28.2 | 28.5 | 26.7 | 29.1 | 28.0 | 0.0 | 1.1 | 0.01 |
| CHML     | 25.3 | 25.3 | 25.5 | 23.6 | 26.4 | 26.2 | 25.1 | 24.9 | 25.6 | 23.8 | 24.9 | 23.9 | 25.4 | 24.8 | 24.7 | 24.5 | 23.5 | 23.9 | 24.1 | 24.0 | 25.2 | 24.1 | 0.0 | 1.1 | 0.02 |
| COA7     | 26.5 | 26.2 | 27.0 | 27.9 | 25.4 | 26.8 | 27.0 | 26.8 | 25.6 | 27.0 | 26.6 | 26.8 | 26.1 | 26.5 | 26.4 | 23.6 | 25.2 | 25.7 | 26.5 | 25.4 | 26.7 | 25.6 | 0.0 | 1.1 | 0.02 |
| HTATIP2  | 23.7 | 25.8 | 23.8 | 22.3 | 23.7 | 23.2 | 24.7 | 26.0 | 23.8 | 22.6 | 25.2 | 26.1 | 24.0 | 25.1 | 22.8 | NaN  | 22.6 | NaN  | 22.9 | NaN  | 23.9 | 22.8 | 0.0 | 1.1 | 0.02 |
| ANKZF1   | 26.7 | 25.7 | 25.8 | 26.2 | 26.1 | 25.1 | 26.1 | 26.7 | 26.2 | 26.4 | 26.5 | 26.2 | 26.1 | 26.2 | 26.1 | 25.0 | 24.9 | 25.5 | 25.1 | 24.7 | 26.2 | 25.0 | 0.0 | 1.1 | 0.02 |
| PAK1     | 27.8 | 28.5 | 27.3 | 27.4 | 27.6 | 28.0 | 27.9 | 28.6 | 27.5 | 27.8 | 28.1 | 27.2 | 28.1 | 28.2 | 28.1 | 26.1 | 26.6 | 27.6 | 26.8 | 26.6 | 27.8 | 26.7 | 0.0 | 1.1 | 0.02 |
| MTA3     | 27.8 | 27.9 | 27.6 | 27.1 | 28.2 | 28.3 | 27.7 | 27.3 | 27.8 | 27.1 | 27.9 | 27.5 | 27.8 | 27.7 | 27.0 | 26.1 | 26.8 | 25.7 | 26.8 | 26.5 | 27.7 | 26.6 | 0.0 | 1.1 | 0.02 |
| EIF1B    | 28.3 | 27.9 | 28.4 | 27.1 | 28.3 | 27.8 | 28.0 | 28.1 | 28.2 | 28.7 | 28.3 | 28.5 | 28.0 | 27.8 | 28.3 | 27.3 | 26.8 | 27.7 | 26.8 | 26.9 | 28.2 | 27.1 | 0.0 | 1.1 | 0.02 |
| FAM207A  | 25.2 | 25.5 | 24.1 | 24.7 | 24.7 | 25.8 | 24.5 | 26.5 | 24.8 | 25.3 | 25.3 | 24.9 | 24.1 | 26.0 | 24.1 | 23.8 | 24.0 | NaN  | 24.5 | 23.7 | 25.1 | 24.0 | 0.0 | 1.1 | 0.02 |
| SLC4A7   | 27.3 | 27.5 | 25.3 | 25.7 | 27.0 | 26.5 | 26.6 | 27.8 | 27.0 | 26.5 | 27.0 | 26.7 | 27.4 | 27.1 | 26.8 | 25.5 | 26.3 | 24.5 | 26.2 | 25.4 | 27.0 | 25.9 | 0.0 | 1.1 | 0.02 |
| JMJD1C   | 23.6 | 25.1 | NaN  | 23.9 | 22.9 | 24.1 | 23.8 | 24.0 | 23.2 | 23.0 | 24.5 | 23.6 | 24.2 | 23.6 | 22.6 | NaN  | 23.0 | NaN  | NaN  | 22.7 | 23.8 | 22.7 | 0.0 | 1.1 | 0.02 |
| PNPLA6   | 25.6 | 25.9 | 24.7 | 25.2 | 25.0 | 26.7 | 25.1 | 25.6 | 25.3 | 25.4 | 25.2 | 24.8 | 24.1 | 24.4 | 24.7 | 24.1 | 24.0 | 24.0 | 24.2 | 24.0 | 25.2 | 24.1 | 0.0 | 1.1 | 0.02 |
| GLTSCR2  | 26.6 | 26.9 | 27.4 | 26.9 | 28.0 | 28.8 | 26.9 | 26.7 | 27.5 | 27.1 | 26.9 | 26.1 | 26.4 | 26.2 | 27.7 | 25.2 | 26.0 | 24.9 | 26.1 | 25.6 | 26.9 | 25.8 | 0.0 | 1.1 | 0.02 |
| PYCR2    | 28.9 | 29.3 | 28.4 | 29.4 | 29.4 | 29.4 | 28.7 | 29.0 | 29.0 | 28.9 | 28.9 | 28.9 | 29.1 | 29.0 | 28.8 | 27.5 | 28.5 | 28.0 | 27.8 | 27.6 | 29.0 | 27.9 | 0.0 | 1.1 | 0.02 |
| SMARCD2  | 27.4 | 27.5 | 26.6 | 27.0 | 26.9 | 27.3 | 27.4 | 28.3 | 27.5 | 27.5 | 27.0 | 26.4 | 27.3 | 27.4 | 26.3 | 25.7 | 26.9 | 25.2 | 26.2 | 27.7 | 27.3 | 26.2 | 0.0 | 1.1 | 0.02 |
| FZD7     | 26.4 | 25.8 | 26.1 | 27.4 | 26.5 | 26.3 | 26.7 | 25.9 | 26.4 | 25.8 | 25.8 | 26.5 | 25.4 | 26.0 | 25.7 | 25.7 | 24.4 | 25.6 | 24.6 | 24.5 | 26.2 | 25.1 | 0.0 | 1.1 | 0.02 |
| GOLPH3L  | 25.2 | 25.3 | 24.7 | 25.8 | 24.6 | 24.6 | 25.6 | 25.9 | 25.5 | 24.8 | 25.5 | 24.5 | 24.7 | 25.6 | 25.2 | 23.9 | 24.1 | 24.1 | 24.8 | 24.1 | 25.2 | 24.1 | 0.0 | 1.1 | 0.02 |
| KNOP1    | 27.4 | 27.5 | 27.1 | 27.6 | 27.5 | 27.5 | 27.4 | 27.2 | 27.5 | 27.7 | 27.5 | 27.4 | 27.1 | 27.5 | 27.4 | 25.7 | 26.6 | 26.3 | 26.7 | 25.9 | 27.5 | 26.4 | 0.0 | 1.1 | 0.02 |
| EIF4EBP1 | 25.7 | 25.8 | 24.2 | 26.1 | 26.9 | 27.3 | 25.6 | 26.4 | 26.1 | 25.7 | 25.5 | 25.6 | 25.7 | 26.4 | 25.6 | 24.0 | 25.6 | 24.0 | 24.4 | 25.0 | 25.8 | 24.7 | 0.0 | 1.1 | 0.02 |
| DDI2     | 26.7 | 26.8 | 26.8 | 26.6 | 27.1 | 27.0 | 26.4 | 27.5 | 26.7 | 26.8 | 26.8 | 26.2 | 26.6 | 26.8 | 26.7 | 24.6 | 26.2 | 25.6 | 25.6 | 25.7 | 26.8 | 25.7 | 0.0 | 1.1 | 0.02 |
| TIMMDC1  | 25.8 | 25.4 | 25.9 | 25.7 | 25.9 | 26.4 | 24.3 | 24.8 | 24.5 | 25.3 | 24.8 | 25.9 | 24.4 | 25.5 | 24.6 | 23.8 | 24.1 | 24.8 | 24.9 | 24.2 | 25.5 | 24.4 | 0.0 | 1.1 | 0.02 |
| PSAT1    | 32.8 | 32.8 | 33.3 | 33.1 | 33.0 | 32.9 | 32.6 | 33.4 | 33.0 | 32.7 | 32.9 | 32.8 | 33.2 | 33.0 | 32.6 | 31.1 | 31.8 | 31.8 | 32.1 | 31.9 | 32.9 | 31.9 | 0.0 | 1.1 | 0.02 |
| UBE2S    | 28.0 | 27.8 | 28.1 | 28.1 | 28.0 | 28.2 | 28.1 | 27.9 | 28.1 | 28.3 | 27.9 | 27.7 | 27.4 | 27.7 | 27.4 | 25.5 | 26.4 | 27.6 | 27.5 | 25.7 | 28.0 | 26.9 | 0.0 | 1.1 | 0.02 |
| PTCD1    | 24.5 | 25.1 | 24.6 | 25.8 | 23.5 | 24.2 | 24.5 | 25.1 | 25.0 | 25.1 | 24.0 | 24.9 | 23.2 | 23.8 | 24.8 | 22.8 | 23.2 | 23.5 | 24.0 | 23.5 | 24.6 | 23.5 | 0.0 | 1.1 | 0.02 |
| HLA-C    | 25.9 | 24.9 | 24.7 | 25.4 | 25.1 | 23.6 | 25.0 | 23.7 | 25.8 | 25.6 | 25.2 | 25.5 | 23.5 | 24.1 | 24.1 | 23.1 | NaN  | 24.2 | 24.0 | 23.4 | 25.0 | 24.0 | 0.0 | 1.1 | 0.02 |
| SLC7A5   | 28.1 | 27.7 | 27.5 | 29.6 | 29.0 | 28.5 | 27.7 | 27.9 | 28.4 | 27.8 | 28.1 | 28.3 | 27.7 | 28.6 | 27.4 | 25.8 | 27.0 | 27.4 | 27.1 | 25.0 | 28.1 | 27.0 | 0.0 | 1.1 | 0.02 |
| ACOT8    | 25.6 | 25.2 | 25.2 | 26.5 | 25.7 | 26.3 | 25.7 | 25.9 | 25.9 | 24.7 | 24.7 | 25.8 | 24.6 | 25.5 | 24.8 | 25.2 | 24.5 | 24.4 | 24.4 | 24.7 | 25.6 | 24.6 | 0.0 | 1.1 | 0.02 |

|          |      |      |      |      |      |      |      |      |      |      |      |      |      |      |      |      |      |      |      |      |      |      |     |     |      |
|----------|------|------|------|------|------|------|------|------|------|------|------|------|------|------|------|------|------|------|------|------|------|------|-----|-----|------|
| TSR1     | 28.6 | 29.4 | 29.4 | 28.7 | 28.7 | 28.9 | 28.7 | 29.5 | 29.3 | 29.3 | 28.8 | 29.4 | 28.9 | 28.8 | 28.7 | 27.2 | 27.9 | 27.8 | 28.4 | 27.5 | 28.9 | 27.8 | 0.0 | 1.0 | 0.02 |
| ARHGAP19 | 23.0 | 24.6 | 21.5 | NaN  | 25.2 | 24.5 | 21.4 | 23.2 | 22.8 | 22.3 | 22.6 | NaN  | 21.7 | 23.4 | 21.7 | 22.0 | NaN  | NaN  | NaN  | NaN  | 22.9 | 21.8 | 0.0 | 1.0 | 0.02 |
| AUH      | 24.9 | 25.5 | 24.4 | 24.4 | 25.1 | 26.0 | 25.3 | 26.1 | 25.4 | 24.9 | 24.6 | 25.4 | 24.2 | 24.6 | 24.5 | 23.9 | 23.8 | 25.1 | 24.1 | 23.9 | 25.0 | 24.0 | 0.0 | 1.0 | 0.02 |
| MIS18A   | 24.7 | 24.5 | 25.1 | 24.9 | 25.5 | 26.2 | 25.2 | 25.8 | 24.7 | 25.3 | 24.9 | 25.0 | 24.7 | 24.5 | 24.2 | NaN  | NaN  | 23.9 | 23.9 | NaN  | 25.0 | 23.9 | 0.0 | 1.0 | 0.02 |
| BLVRB    | 27.0 | 26.6 | 26.5 | 26.9 | 26.4 | 27.0 | 27.8 | 27.3 | 26.6 | 26.7 | 26.5 | 26.5 | 26.6 | 27.0 | 25.7 | 26.5 | 25.4 | 25.5 | 25.5 | 26.0 | 26.6 | 25.6 | 0.0 | 1.0 | 0.02 |
| PLCB3    | 29.7 | 29.7 | 29.7 | 29.5 | 30.2 | 30.3 | 29.5 | 29.6 | 29.6 | 29.5 | 29.6 | 29.4 | 29.3 | 29.5 | 28.7 | 28.5 | 28.7 | 28.3 | 28.1 | 28.6 | 29.6 | 28.6 | 0.0 | 1.0 | 0.02 |
| ASNS     | 30.4 | 30.7 | 31.8 | 31.4 | 31.0 | 30.7 | 30.2 | 31.6 | 31.0 | 31.0 | 30.8 | 31.4 | 31.1 | 30.6 | 31.0 | 28.8 | 29.6 | 30.3 | 30.6 | 29.5 | 31.0 | 30.0 | 0.0 | 1.0 | 0.03 |
| PYCR1    | 29.4 | 29.4 | 28.9 | 29.5 | 29.6 | 29.9 | 29.1 | 29.4 | 29.6 | 29.5 | 29.4 | 29.4 | 29.7 | 29.3 | 29.0 | 28.3 | 29.6 | 28.5 | 28.3 | 28.3 | 29.4 | 28.4 | 0.0 | 1.0 | 0.03 |
| MSH2     | 31.4 | 31.2 | 31.4 | 31.2 | 31.4 | 31.4 | 31.2 | 31.4 | 31.3 | 31.3 | 31.2 | 31.2 | 31.3 | 31.4 | 31.0 | 29.6 | 30.2 | 30.4 | 30.5 | 29.7 | 31.3 | 30.3 | 0.0 | 1.0 | 0.03 |
| MAN2A1   | 28.2 | 27.8 | 27.8 | 28.6 | 28.0 | 27.5 | 28.1 | 28.3 | 27.9 | 28.2 | 27.8 | 28.1 | 28.0 | 28.1 | 26.8 | 26.0 | 27.1 | 27.2 | 27.0 | 27.2 | 28.1 | 27.1 | 0.0 | 1.0 | 0.03 |
| CUTC     | 25.4 | 26.0 | 25.7 | 25.8 | 26.1 | 26.5 | 25.4 | 26.2 | 25.8 | 25.3 | 25.7 | 25.1 | 25.8 | 25.7 | 25.1 | 25.5 | 24.6 | 24.9 | 24.6 | 24.2 | 25.7 | 24.7 | 0.0 | 1.0 | 0.03 |
| FADD     | 28.6 | 28.4 | 28.5 | 27.6 | 28.0 | 28.0 | 28.7 | 29.0 | 28.4 | 28.6 | 28.1 | 27.9 | 28.2 | 28.4 | 28.3 | 27.5 | 26.5 | 27.2 | 27.4 | 27.3 | 28.4 | 27.4 | 0.0 | 1.0 | 0.03 |
| JUP      | 29.9 | 30.1 | 29.9 | 30.0 | 29.8 | 30.2 | 29.7 | 29.9 | 29.9 | 29.8 | 29.9 | 30.1 | 29.4 | 29.7 | 29.2 | 28.2 | 28.8 | 29.1 | 29.0 | 27.5 | 29.9 | 28.9 | 0.0 | 1.0 | 0.03 |
| PHGDH    | 33.7 | 33.7 | 33.6 | 33.7 | 34.0 | 34.3 | 33.6 | 34.0 | 33.9 | 33.6 | 33.6 | 33.4 | 33.9 | 33.8 | 33.5 | 31.9 | 33.0 | 32.6 | 32.8 | 32.5 | 33.7 | 32.7 | 0.0 | 1.0 | 0.03 |
| POLR2L   | 27.0 | 25.9 | 26.8 | 26.6 | 26.9 | 27.2 | 26.5 | 27.2 | 26.2 | 25.8 | 25.9 | 26.5 | 25.9 | 26.3 | 26.4 | 26.3 | 25.3 | 23.9 | 25.7 | 25.1 | 26.5 | 25.5 | 0.0 | 1.0 | 0.03 |
| TRABD    | 26.0 | 26.0 | 25.5 | 25.8 | 26.3 | 26.2 | 25.6 | 25.0 | 25.7 | 25.8 | 25.6 | 25.7 | 24.6 | 25.7 | 25.2 | 23.4 | 25.1 | 24.5 | 24.4 | 25.0 | 25.7 | 24.7 | 0.0 | 1.0 | 0.03 |
| HK2      | 29.6 | 30.0 | 30.4 | 29.8 | 29.7 | 29.4 | 29.6 | 29.8 | 29.8 | 29.8 | 29.8 | 29.8 | 29.8 | 29.8 | 29.5 | 27.2 | 28.6 | 29.4 | 28.9 | 26.6 | 29.8 | 28.8 | 0.0 | 1.0 | 0.03 |
| RCOR2    | 27.3 | 27.2 | 27.3 | 27.8 | 27.5 | 27.2 | 27.2 | 26.7 | 27.5 | 27.3 | 27.3 | 27.3 | 27.1 | 27.1 | 27.2 | 26.3 | 26.3 | 26.6 | 26.1 | 25.0 | 27.3 | 26.3 | 0.0 | 1.0 | 0.03 |
| PDCD2L   | 26.4 | 26.7 | 26.6 | 27.3 | 26.9 | 26.7 | 26.9 | 27.1 | 26.8 | 26.8 | 26.5 | 26.8 | 26.1 | 26.8 | 26.1 | 24.9 | 25.6 | 26.0 | 26.3 | 24.9 | 26.8 | 25.8 | 0.0 | 1.0 | 0.03 |
| CDC123   | 27.8 | 28.0 | 28.4 | 27.9 | 28.1 | 28.2 | 27.9 | 28.5 | 27.8 | 28.0 | 27.8 | 28.2 | 27.2 | 27.7 | 27.7 | 26.3 | 26.5 | 27.4 | 27.5 | 26.4 | 27.9 | 27.0 | 0.0 | 1.0 | 0.03 |
| NFXL1    | 25.1 | 25.6 | 25.9 | 26.7 | 26.4 | 26.1 | 25.5 | 25.7 | 25.8 | 25.3 | 25.1 | 26.2 | 25.0 | 24.3 | 25.2 | 23.9 | 25.2 | 24.7 | 24.6 | 23.4 | 25.6 | 24.6 | 0.0 | 1.0 | 0.03 |
| GCLC     | 25.6 | 26.1 | 26.2 | 26.6 | 25.9 | 26.2 | 26.3 | 26.3 | 26.0 | 25.7 | 26.3 | 25.7 | 26.2 | 26.2 | 25.4 | 24.9 | 25.0 | 25.9 | 25.9 | 24.9 | 26.2 | 25.2 | 0.0 | 1.0 | 0.03 |
| STRBP    | 28.9 | 29.0 | 29.0 | 29.2 | 28.4 | 28.5 | 28.7 | 29.0 | 28.8 | 29.2 | 28.9 | 28.8 | 28.6 | 28.6 | 28.4 | 27.4 | 28.1 | 27.9 | 27.8 | 26.7 | 28.8 | 27.8 | 0.0 | 1.0 | 0.03 |
| NDC1     | 27.3 | 27.1 | 27.2 | 27.5 | 27.6 | 27.8 | 27.2 | 27.1 | 27.3 | 27.2 | 27.4 | 27.5 | 27.0 | 27.1 | 27.2 | 26.0 | 26.3 | 26.0 | 26.6 | 26.2 | 27.3 | 26.3 | 0.0 | 1.0 | 0.03 |
| ZNF687   | 25.7 | 25.3 | 24.8 | 25.3 | 25.3 | 25.7 | 25.4 | 25.0 | 24.8 | 25.6 | 25.6 | 24.5 | 25.9 | 25.5 | 24.8 | 24.3 | 24.0 | 24.7 | 24.5 | 24.1 | 25.4 | 24.4 | 0.0 | 1.0 | 0.03 |
| GPT2     | 28.2 | 28.2 | 28.5 | 29.4 | 28.5 | 28.4 | 27.7 | 28.5 | 28.5 | 28.4 | 28.0 | 28.9 | 27.9 | 28.5 | 28.0 | 27.0 | 26.9 | 27.5 | 27.7 | 27.4 | 28.4 | 27.5 | 0.0 | 1.0 | 0.03 |
| HLA-A    | 24.7 | 23.9 | NaN  | 24.2 | 25.9 | 24.0 | 24.1 | 22.8 | 24.7 | 24.3 | 24.2 | 24.5 | 24.1 | 24.0 | 23.2 | 22.8 | NaN  | NaN  | 23.4 | NaN  | 24.2 | 23.2 | 0.0 | 1.0 | 0.03 |
| WNK3     | 24.0 | 24.4 | 22.9 | 23.7 | 23.7 | 24.1 | 23.3 | 25.1 | 23.4 | 23.6 | 23.8 | NaN  | 23.0 | 23.7 | 22.8 | NaN  | 23.2 | 23.7 | 22.8 | 22.1 | 23.7 | 22.8 | 0.0 | 1.0 | 0.03 |
| ZNF483   | 27.0 | 26.7 | 25.6 | 25.7 | 26.0 | 26.0 | 26.6 | 26.6 | 26.3 | 26.0 | 26.7 | 25.5 | 25.1 | 26.5 | 25.0 | 25.3 | 25.4 | 23.9 | 22.8 | 25.9 | 26.2 | 25.2 | 0.0 | 1.0 | 0.03 |
| MRPL17   | 27.8 | 27.8 | 27.4 | 27.8 | 27.6 | 28.1 | 27.8 | 27.8 | 27.7 | 27.8 | 27.0 | 27.8 | 27.4 | 27.3 | 27.7 | 26.3 | 27.6 | 26.7 | 26.9 | 26.8 | 27.8 | 26.8 | 0.0 | 1.0 | 0.03 |
| RPUSD2   | 26.3 | 26.3 | 26.5 | 26.4 | 26.1 | 26.0 | 26.6 | 27.0 | 26.4 | 26.4 | 26.5 | 26.6 | 26.2 | 26.7 | 26.3 | 24.8 | 25.4 | 25.2 | 26.0 | 25.5 | 26.4 | 25.5 | 0.0 | 1.0 | 0.03 |
| LYN      | 27.3 | 28.0 | 27.0 | 27.3 | 28.2 | 28.1 | 26.6 | 27.7 | 26.6 | 27.0 | 27.1 | 27.1 | 27.2 | 27.8 | 26.3 | 27.0 | 27.2 | 25.8 | 26.2 | 25.9 | 27.2 | 26.3 | 0.0 | 1.0 | 0.03 |
| CHEK2    | 25.4 | 26.3 | 25.5 | 26.9 | 26.3 | 26.0 | 25.8 | 24.5 | 25.8 | 26.4 | 26.0 | 24.6 | 26.0 | 25.6 | 25.7 | 23.7 | 24.5 | 25.5 | 24.6 | 25.2 | 25.9 | 24.9 | 0.0 | 1.0 | 0.03 |
| RRS1     | 29.5 | 29.8 | 28.6 | 29.6 | 29.9 | 30.2 | 29.3 | 29.6 | 29.6 | 29.5 | 29.2 | 29.6 | 28.7 | 29.5 | 29.3 | 27.2 | 28.7 | 27.8 | 28.6 | 28.7 | 29.6 | 28.6 | 0.0 | 1.0 | 0.03 |
| DNAJB5   | 24.3 | 24.9 | 25.4 | 24.9 | 25.1 | 26.1 | 24.7 | 23.9 | 24.8 | 25.8 | 25.0 | 23.3 | 24.3 | 24.6 | 24.6 | 23.7 | 24.1 | 24.6 | 23.3 | 23.6 | 24.9 | 23.9 | 0.0 | 0.9 | 0.03 |
| TIMELESS | 26.3 | 26.7 | 25.7 | 26.5 | 26.1 | 26.4 | 26.3 | 26.5 | 26.3 | 26.3 | 26.5 | 26.3 | 26.1 | 26.2 | 26.3 | 24.8 | 25.0 | 25.7 | 25.8 | 24.5 | 26.3 | 25.4 | 0.0 | 0.9 | 0.04 |
| TFB1M    | 26.3 | 26.8 | 26.2 | 26.7 | 26.8 | 26.9 | 26.2 | 26.1 | 25.9 | 26.5 | 26.1 | 25.6 | 26.2 | 25.8 | 25.5 | 24.6 | 25.7 | 25.9 | 24.4 | 25.0 | 26.2 | 25.3 | 0.0 | 0.9 | 0.04 |
| PASK     | 24.6 | 24.4 | 24.4 | 24.2 | 24.0 | 24.3 | 24.5 | 24.6 | 24.2 | 24.4 | 24.9 | 23.6 | 25.2 | 24.9 | 23.5 | 24.1 | 23.2 | 23.7 | NaN  | 22.9 | 24.4 | 23.5 | 0.0 | 0.9 | 0.04 |
| HSD17B4  | 32.4 | 32.4 | 32.2 | 32.2 | 32.2 | 32.6 | 32.5 | 32.4 | 32.3 | 32.2 | 32.2 | 32.3 | 32.3 | 32.4 | 31.8 | 31.7 | 31.3 | 31.4 | 31.3 | 30.9 | 32.3 | 31.4 | 0.0 | 0.9 | 0.04 |
| DDX18    | 30.6 | 30.5 | 30.0 | 30.2 | 30.6 | 30.6 | 29.7 | 30.4 | 30.1 | 30.3 | 29.9 | 30.9 | 29.6 | 30.1 | 29.9 | 28.6 | 29.4 | 29.2 | 29.8 | 29.1 | 30.2 | 29.3 | 0.0 | 0.9 | 0.04 |
| PPM1B    | 28.6 | 28.3 | 28.2 | 28.7 | 29.3 | 29.5 | 29.0 | 29.1 | 28.7 | 28.2 | 28.2 | 28.0 | 28.4 | 28.7 | 28.2 | 27.8 | 27.7 | 28.1 | 27.6 | 27.3 | 28.7 | 27.7 | 0.0 | 0.9 | 0.04 |
| RNF114   | 27.5 | 27.0 | 26.4 | 26.7 | 26.4 | 26.9 | 27.6 | 27.0 | 26.9 | 27.8 | 27.6 | 26.6 | 27.3 | 27.3 | 27.1 | 26.6 | 26.0 | 24.9 | 24.8 | 26.2 | 27.0 | 26.1 | 0.0 | 0.9 | 0.04 |

|           |      |      |      |      |      |      |      |      |      |      |      |      |      |      |      |      |      |      |      |      |      |      |     |     |      |
|-----------|------|------|------|------|------|------|------|------|------|------|------|------|------|------|------|------|------|------|------|------|------|------|-----|-----|------|
| AAMP      | 27.4 | 27.7 | 27.7 | 27.4 | 27.3 | 27.2 | 27.3 | 27.4 | 27.4 | 27.4 | 27.0 | 27.6 | 26.9 | 26.7 | 26.7 | 26.5 | 26.4 | 26.1 | 26.8 | 26.0 | 27.4 | 26.4 | 0.0 | 0.9 | 0.04 |
| CHMP2B    | 25.7 | 24.8 | 24.6 | 25.1 | 25.6 | 24.4 | 26.0 | 25.7 | 25.8 | 25.7 | 25.4 | 24.5 | 25.3 | 25.9 | 25.1 | 24.9 | 24.7 | 22.8 | 24.4 | 24.5 | 25.5 | 24.6 | 0.0 | 0.9 | 0.04 |
| COL4A3BP  | 27.2 | 27.4 | 27.2 | 26.8 | 27.2 | 27.6 | 27.4 | 27.4 | 27.2 | 27.0 | 27.3 | 26.6 | 27.1 | 27.3 | 26.7 | 26.3 | 26.5 | 26.2 | 26.3 | 25.9 | 27.2 | 26.3 | 0.0 | 0.9 | 0.04 |
| UTP20     | 28.4 | 28.8 | 28.6 | 28.9 | 28.7 | 28.8 | 28.3 | 28.8 | 28.5 | 28.6 | 28.5 | 29.3 | 28.1 | 28.3 | 28.3 | 26.2 | 27.7 | 27.7 | 28.0 | 27.5 | 28.6 | 27.7 | 0.0 | 0.9 | 0.04 |
| HSPA14    | 28.2 | 28.2 | 28.3 | 27.7 | 28.2 | 28.2 | 28.1 | 28.3 | 28.0 | 28.3 | 27.9 | 27.8 | 28.0 | 27.9 | 28.0 | 26.0 | 27.2 | 27.2 | 27.9 | 27.1 | 28.1 | 27.2 | 0.0 | 0.9 | 0.04 |
| SET       | 33.0 | 32.8 | 33.0 | 32.8 | 32.9 | 32.9 | 33.0 | 32.7 | 33.1 | 32.7 | 32.9 | 32.4 | 33.0 | 33.0 | 32.8 | 31.7 | 32.1 | 32.2 | 31.9 | 31.8 | 32.9 | 32.0 | 0.0 | 0.9 | 0.04 |
| PDPR      | 27.5 | 27.1 | 26.8 | 27.1 | 26.9 | 26.7 | 26.9 | 27.2 | 26.9 | 26.9 | 26.6 | 27.4 | 26.8 | 27.3 | 26.7 | 25.2 | 25.8 | 25.8 | 26.2 | 26.7 | 26.9 | 26.0 | 0.0 | 0.9 | 0.04 |
| SLC7A1    | 26.0 | 26.2 | 26.4 | 27.2 | 26.9 | 26.6 | 25.8 | 26.4 | 26.5 | 26.3 | 26.2 | 26.7 | 26.1 | 26.3 | 25.7 | 24.7 | 25.2 | 25.7 | 25.9 | 23.9 | 26.3 | 25.4 | 0.0 | 0.9 | 0.04 |
| RCC2      | 32.4 | 32.4 | 32.5 | 32.6 | 32.6 | 32.9 | 32.7 | 32.5 | 32.5 | 32.4 | 32.4 | 32.3 | 32.5 | 32.4 | 32.2 | 30.7 | 31.7 | 31.6 | 32.0 | 31.4 | 32.5 | 31.6 | 0.0 | 0.9 | 0.04 |
| NLN       | 30.4 | 30.3 | 30.1 | 30.4 | 30.1 | 30.3 | 30.4 | 30.4 | 30.1 | 30.1 | 30.1 | 30.1 | 30.2 | 30.3 | 29.4 | 28.9 | 29.3 | 29.3 | 29.4 | 29.0 | 30.2 | 29.3 | 0.0 | 0.9 | 0.04 |
| LRRC1     | 24.3 | 25.4 | 23.8 | 23.7 | 24.2 | NaN  | 24.2 | 23.5 | 24.3 | 24.0 | 24.1 | 24.0 | 23.3 | 23.3 | 22.9 | 22.4 | 23.2 | 23.0 | 23.7 | 23.2 | 24.0 | 23.1 | 0.0 | 0.9 | 0.04 |
| PHC1      | 25.3 | 24.8 | 25.7 | 26.0 | 25.7 | 25.6 | 24.9 | 25.3 | 25.5 | 26.2 | 25.3 | 24.4 | 24.1 | 25.1 | 25.3 | 24.5 | 24.0 | 24.4 | 24.2 | NaN  | 25.3 | 24.4 | 0.0 | 0.9 | 0.04 |
| CYB5A     | 28.6 | 28.4 | 27.2 | 28.2 | 28.7 | 28.0 | 28.6 | 28.5 | 28.5 | 28.3 | 28.1 | 28.6 | 28.2 | 28.6 | 27.6 | 27.9 | 27.5 | 27.2 | 27.0 | 27.6 | 28.4 | 27.5 | 0.0 | 0.9 | 0.04 |
| TIMM8A    | 26.5 | 25.9 | 25.4 | 26.7 | 27.2 | 27.6 | 26.5 | 27.0 | 26.6 | 26.6 | 26.1 | 27.1 | 25.3 | 26.6 | 26.3 | 25.5 | 25.9 | 25.5 | 26.0 | 25.5 | 26.6 | 25.7 | 0.0 | 0.9 | 0.04 |
| MAD2L2    | 23.2 | 24.6 | 24.1 | 23.8 | 25.5 | 26.7 | 23.7 | 24.4 | 24.4 | 23.6 | 24.9 | 23.8 | 21.8 | 24.6 | 22.3 | 23.3 | 23.9 | 23.3 | 23.4 | NaN  | 24.2 | 23.3 | 0.0 | 0.9 | 0.04 |
| DPYSL3    | 33.0 | 33.3 | 33.5 | 33.0 | 33.2 | 33.6 | 33.1 | 33.3 | 33.3 | 33.1 | 33.4 | 33.1 | 33.1 | 33.2 | 32.8 | 33.1 | 32.4 | 32.2 | 32.2 | 31.7 | 33.2 | 32.3 | 0.0 | 0.9 | 0.04 |
| MAP3K4    | 25.2 | 25.6 | 25.2 | 24.9 | 24.4 | 24.8 | 25.0 | 26.3 | 24.5 | 24.2 | 25.2 | 25.3 | 24.9 | 24.7 | 24.4 | 24.2 | 25.1 | 23.9 | 23.9 | 23.5 | 25.0 | 24.1 | 0.0 | 0.9 | 0.04 |
| NCBP2-AS2 | 23.2 | 24.2 | 23.0 | 22.8 | 22.6 | 23.1 | 23.3 | 24.4 | 23.5 | 23.3 | 23.9 | 22.5 | 22.8 | 23.5 | 22.8 | 22.2 | 21.9 | 22.4 | 21.9 | 23.0 | 23.2 | 22.3 | 0.0 | 0.9 | 0.04 |
| ZNF532    | 27.0 | 27.2 | 26.9 | 27.0 | 26.9 | 26.9 | 26.6 | 26.7 | 27.0 | 27.3 | 27.2 | 26.9 | 27.0 | 27.0 | 26.7 | 25.4 | 26.3 | 26.3 | 25.8 | 25.9 | 27.0 | 26.1 | 0.0 | 0.9 | 0.04 |
| MARS      | 31.3 | 31.5 | 31.2 | 31.0 | 31.0 | 31.7 | 31.2 | 31.6 | 31.3 | 31.2 | 31.3 | 30.8 | 31.4 | 31.3 | 30.8 | 30.1 | 30.9 | 30.3 | 30.4 | 30.4 | 31.3 | 30.4 | 0.0 | 0.9 | 0.04 |
| GAN       | 24.5 | 24.0 | 23.8 | 24.1 | 24.6 | 24.8 | 24.4 | 23.8 | 24.5 | 24.1 | 24.0 | 23.7 | 24.1 | 23.9 | 24.2 | 23.3 | 22.7 | 23.6 | 23.0 | 22.6 | 24.1 | 23.2 | 0.0 | 0.9 | 0.04 |
| HLTF      | 26.2 | 26.5 | 25.3 | 25.9 | 26.2 | 25.8 | 25.6 | 26.4 | 25.6 | 25.4 | 26.1 | 25.1 | 26.5 | 26.5 | 25.2 | 24.7 | 24.9 | 25.0 | 25.7 | 25.8 | 26.0 | 25.1 | 0.0 | 0.9 | 0.05 |
| USP9X     | 30.4 | 30.2 | 30.3 | 30.4 | 29.7 | 29.7 | 31.1 | 30.8 | 29.9 | 30.6 | 30.0 | 30.1 | 30.4 | 29.7 | 29.2 | 29.5 | 28.9 | 30.4 | 29.5 | 29.1 | 30.2 | 29.4 | 0.0 | 0.9 | 0.05 |
| MCU       | 27.0 | 28.0 | 25.8 | 27.1 | 26.6 | 26.9 | 26.7 | 27.6 | 26.4 | 26.5 | 26.7 | 27.5 | 26.4 | 27.2 | 26.0 | 26.2 | 25.8 | 25.2 | 26.0 | 25.7 | 26.8 | 25.9 | 0.0 | 0.9 | 0.05 |
| TBRG4     | 29.1 | 29.4 | 29.1 | 29.1 | 28.5 | 28.7 | 29.3 | 29.4 | 28.9 | 29.1 | 29.2 | 30.0 | 29.1 | 28.9 | 29.1 | 27.1 | 28.5 | 27.9 | 29.1 | 28.0 | 29.1 | 28.3 | 0.0 | 0.9 | 0.05 |
| WDHD1     | 29.3 | 29.1 | 29.1 | 29.1 | 29.1 | 29.4 | 29.8 | 29.3 | 29.3 | 29.2 | 29.3 | 28.7 | 29.1 | 29.4 | 28.9 | 27.3 | 28.3 | 28.5 | 28.6 | 27.5 | 29.3 | 28.4 | 0.0 | 0.9 | 0.05 |
| NOP16     | 27.9 | 27.5 | 27.6 | 28.0 | 27.8 | 27.6 | 27.5 | 27.7 | 27.7 | 28.0 | 27.6 | 27.8 | 26.9 | 27.7 | 27.5 | 26.0 | 26.6 | 26.6 | 27.3 | 27.0 | 27.7 | 26.8 | 0.0 | 0.9 | 0.05 |
| CCBL1     | 26.0 | 25.6 | 25.0 | 24.9 | 25.9 | 26.0 | 25.4 | 26.4 | 25.8 | 25.3 | 25.7 | 24.5 | 26.7 | 26.2 | 25.5 | 25.1 | 24.3 | 25.1 | 24.7 | 24.4 | 25.8 | 24.9 | 0.0 | 0.9 | 0.05 |
| TRMT1L    | 27.0 | 26.6 | 27.0 | 26.8 | 27.0 | 26.9 | 27.1 | 27.0 | 27.0 | 27.1 | 27.0 | 26.7 | 27.0 | 26.7 | 26.9 | 24.9 | 26.3 | 26.2 | 25.6 | 26.0 | 27.0 | 26.1 | 0.0 | 0.9 | 0.05 |
| DAZAP1    | 30.3 | 29.8 | 29.5 | 29.6 | 30.1 | 30.4 | 30.1 | 30.3 | 30.4 | 30.0 | 29.9 | 29.9 | 30.0 | 30.3 | 29.7 | 29.0 | 29.3 | 28.4 | 29.1 | 29.3 | 30.0 | 29.2 | 0.0 | 0.9 | 0.05 |
| ORC2      | 25.8 | 27.1 | 26.2 | 26.3 | 25.9 | 26.4 | 25.6 | 27.0 | 25.9 | 26.3 | 26.2 | 25.8 | 26.2 | 26.3 | 25.7 | 24.7 | 25.5 | NaN  | 24.8 | 25.3 | 26.2 | 25.3 | 0.0 | 0.9 | 0.05 |
| GEMIN7    | 26.1 | 25.7 | 25.9 | 26.0 | 25.5 | 26.4 | 25.5 | 24.8 | 25.6 | 25.3 | 25.8 | 25.1 | 25.4 | 25.0 | 25.6 | NaN  | 24.7 | 25.2 | 24.7 | 24.4 | 25.5 | 24.7 | 0.0 | 0.9 | 0.05 |
| RANGRF    | 23.4 | 24.7 | 23.1 | 23.7 | 23.2 | 23.7 | 24.4 | 24.2 | 24.1 | 23.4 | 23.6 | 22.5 | 23.7 | 23.4 | 23.2 | 22.3 | 23.2 | 23.0 | 21.8 | 22.5 | 23.6 | 22.8 | 0.0 | 0.9 | 0.05 |
