# Supplementary material for: Reprogrammed Cells Display Distinct Proteomic Signatures Associated with Colony Morphology Variability
Source: Hindawi journal article supplement (doi:10.1155/2019/8036035), 2019-11-18
Supplement: f1 [file 8036035.f1.zip]

**Supplement table 1: Information about the reprogrammed lines included in the study**

| cell line | donor   | reprogramming<br>method | donor<br>sex | microscopic<br>classification | passage<br>SSEA4+ | passage<br>classified |
|-----------|---------|-------------------------|--------------|-------------------------------|-------------------|-----------------------|
| 1-A       | donor 1 | Episomal                | f            | stable                        | P6                | p11                   |
| 1-B       | donor 1 | Episomal                | f            | stable                        | p5                | p10                   |
| 1-C       | donor 1 | Episomal                | f            | stable                        | p6                | p11                   |
| 2-A       | donor 2 | Episomal                | m            | stable                        | p5                | p12                   |
| 2-B       | donor 2 | Episomal                | m            | stable                        | p5                | p11                   |
| 2-C       | donor 2 | Episomal                | m            | stable                        | p3                | p7                    |
| 3-A       | donor 3 | Episomal                | m            | stable                        | p8                | p12                   |
| 3-B       | donor 3 | Episomal                | m            | unstable, class 1             | p6                | p13                   |
| 3-C       | donor 3 | Episomal                | m            | unstable, class 2             | p5                | p14                   |
| 3-D       | donor 3 | Episomal                | m            | stable                        | P5                | p11                   |
| 4-A       | donor 4 | Episomal                | m            | unstable, class 2             | p7                | p12                   |
| 4-B       | donor 4 | Episomal                | m            | stable                        | p8                | p17                   |
| 4-C       | donor 4 | Episomal                | m            | unstable, class 1             | p6                | p12                   |
| 5-A       | donor 5 | sendai virus            | m            | stable                        | p11               | p18                   |
| 5-B       | donor 5 | sendai virus            | m            | stable                        | p11               | p16                   |
| 6-A       | donor 6 | sendai virus            | m            | unstable, class 1             | p11               | p17                   |
| 6-B       | donor 6 | sendai virus            | m            | stable                        | p11               | p18                   |
| 6-C       | donor 6 | sendai virus            | m            | unstable, class 1             | p11               | p17                   |
| 7-A       | donor 7 | sendai virus            | f            | stable                        | p11               | p17                   |
| 7-B       | donor 7 | sendai virus            | f            | stable                        | p11               | p16                   |
