# Supplementary material for: Reprogrammed Cells Display Distinct Proteomic Signatures Associated with Colony Morphology Variability
Source: Hindawi journal article supplement (doi:10.1155/2019/8036035), 2019-11-18
Supplement: f1 [file 8036035.f1.zip]

**Supplement table 3: Proteins being more abundant (named by gene names) in unstable colony morphology group.**

**S=stable colony morphology group,U-1= Unstable class 1 morphology group, U-2=unstable class 2 morphology group .**

**FC=fold change. The list is sorted by FC. All proteins have a p-value <0.05 and a FC p-value <0.05. The list includes 338 proteins.**

**Expression values are log2 transformed LFQ intensity values.**

| Gene names | 1-C<br>S | 3-A<br>S | 4-B<br>S | 5-A<br>S | 5-B<br>S | 6-B<br>S | 7-A<br>S | 7-B<br>S | 3-D<br>S | 1-A<br>S | 1-B<br>S | 2-A<br>S | 2-B<br>S | 2-C<br>S | 3-B<br>U-1 | 6-A<br>U-1 | 6-C<br>U-1 | 4-C<br>U-1 | 3-C<br>U-2 | 4-A<br>U-2 | Median<br>S | Median<br>U | p-value | FC<br>S/U | FC<br>p-value |
|------------|----------|----------|----------|----------|----------|----------|----------|----------|----------|----------|----------|----------|----------|----------|------------|------------|------------|------------|------------|------------|-------------|-------------|---------|-----------|---------------|
| MRC2       | 19.8     | 21.3     | 21.4     | 20.3     | NaN      | 21.3     | 20.5     | NaN      | 20.9     | 21.9     | 20.6     | 21.9     | 22.7     | 22.4     | 23.0       | 31.2       | 28.9       | 28.0       | 26.0       | 29.1       | 21.3        | 28.5        | 0.0     | -7.2      | 0             |
| FN1        | 21.0     | 22.3     | 21.3     | 21.6     | 20.9     | 21.0     | 21.2     | NaN      | 20.8     | 21.2     | 21.0     | 20.8     | 21.1     | 21.2     | 21.4       | 29.1       | 28.0       | 22.1       | 27.6       | 28.7       | 21.1        | 27.8        | 0.0     | -6.7      | 0             |
| MAP2       | 21.7     | 23.7     | 23.8     | 22.7     | 22.5     | NaN      | 21.2     | 22.0     | 22.9     | 26.9     | 28.5     | 22.8     | 27.0     | 26.9     | 29.1       | 31.9       | 29.0       | 31.3       | 27.2       | 23.3       | 22.9        | 29.0        | 0.0     | -6.2      | 0             |
| FKBP9      | NaN      | 19.5     | NaN      | 20.8     | NaN      | NaN      | 20.1     | 19.2     | NaN      | 21.7     | 21.2     | NaN      | 22.4     | 21.5     | 23.2       | 27.8       | 26.4       | 26.5       | 27.1       | 30.3       | 21.0        | 26.8        | 0.0     | -5.9      | 0             |
| EPB41L3    | 22.0     | 21.3     | 22.3     | 20.3     | 22.5     | 23.3     | 22.3     | 21.7     | 22.2     | 22.2     | 22.2     | 22.0     | 23.8     | 22.1     | 24.8       | 30.0       | 25.2       | 27.2       | 28.7       | 28.9       | 22.2        | 27.9        | 0.0     | -5.8      | 0             |
| ZC3HAV1L   | NaN      | 20.2     | 20.9     | 21.6     | NaN      | NaN      | NaN      | 22.1     | NaN      | 20.9     | 23.3     | 22.7     | 23.5     | 22.4     | 25.9       | 25.4       | 29.1       | 27.5       | 27.8       | 28.9       | 22.1        | 27.7        | 0.0     | -5.6      | 0             |
| SMURF1     | 19.7     | NaN      | 20.3     | 19.7     | NaN      | NaN      | 19.6     | NaN      | 20.6     | 19.9     | 19.9     | 20.9     | 23.4     | 19.7     | 24.7       | 24.9       | 25.4       | 24.9       | 25.8       | 26.1       | 19.9        | 25.2        | 0.0     | -5.3      | 0             |
| LGALS1     | 26.1     | 26.4     | 25.4     | 23.6     | 22.7     | 24.2     | 25.2     | 26.2     | 25.4     | 26.2     | 25.2     | 26.5     | 28.0     | 26.5     | 29.0       | 31.8       | 30.9       | 30.0       | 31.2       | 31.0       | 25.8        | 31.0        | 0.0     | -5.2      | 0             |
| ANXA1      | 27.5     | 26.5     | 23.1     | 28.1     | 27.2     | 24.8     | 26.6     | 26.1     | 25.9     | 27.1     | 27.4     | 28.6     | 27.4     | 28.9     | 29.6       | 32.2       | 32.2       | 32.2       | 30.6       | 32.3       | 27.1        | 32.2        | 0.0     | -5.1      | 0             |
| NEK7       | 21.8     | 22.0     | 22.3     | 21.6     | 21.9     | 20.0     | 22.3     | 20.8     | 21.3     | 22.4     | 22.2     | 22.1     | 23.5     | 21.8     | 25.6       | 26.7       | 27.1       | 26.8       | 27.9       | 28.6       | 22.0        | 27.0        | 0.0     | -5.0      | 0             |
| COL3A1     | 21.7     | 21.4     | 22.0     | 21.3     | 22.3     | 22.8     | 21.9     | NaN      | 22.2     | 21.2     | 22.1     | 22.5     | 21.8     | 21.5     | 21.7       | 28.2       | 22.8       | 29.0       | 25.6       | 30.2       | 21.9        | 26.9        | 0.0     | -5.0      | 0             |
| PALLD      | 24.3     | 24.0     | 24.5     | 23.5     | 24.6     | 24.8     | 26.1     | 24.7     | 26.2     | 26.4     | 27.3     | 24.7     | 26.1     | 26.9     | 27.5       | 30.8       | 30.8       | 31.4       | 28.5       | 26.0       | 24.8        | 29.6        | 0.0     | -4.8      | 0             |
| NEFM       | 22.4     | 27.5     | 25.5     | 23.5     | 23.1     | 21.6     | 24.1     | 24.2     | 24.9     | 25.3     | 27.0     | 27.4     | 27.3     | 28.4     | 30.6       | 29.2       | 30.2       | 31.3       | 27.7       | 23.0       | 25.1        | 29.7        | 0.0     | -4.6      | 1.6E-14       |
| AHNAK      | 25.1     | 25.5     | 22.3     | 24.4     | 23.7     | 23.8     | 25.3     | 24.8     | 23.6     | 26.1     | 26.3     | 22.5     | 25.3     | 26.0     | 28.1       | 31.1       | 29.2       | 29.9       | 29.9       | 28.7       | 25.0        | 29.5        | 0.0     | -4.6      | 2.5E-14       |
| GSTM3      | 23.1     | 22.9     | 21.9     | 23.2     | 22.7     | NaN      | 22.9     | 22.6     | 21.7     | 23.4     | 25.3     | 23.0     | 23.8     | 23.2     | 25.3       | 27.5       | 30.0       | 27.6       | 26.7       | 27.9       | 23.0        | 27.5        | 0.0     | -4.6      | 3.0E-14       |
| KCTD12     | 23.2     | 20.6     | 21.8     | 22.2     | 23.2     | 24.0     | 23.0     | 23.9     | 22.6     | 24.4     | 24.5     | 21.9     | 24.7     | 24.5     | 26.5       | 28.1       | 27.2       | 26.9       | 29.7       | 30.8       | 23.2        | 27.6        | 0.0     | -4.4      | 1.4E-13       |
| NEFL       | NaN      | 24.3     | 19.6     | NaN      | NaN      | NaN      | 20.6     | NaN      | 20.7     | 24.8     | 25.6     | 22.8     | 24.5     | 26.5     | 27.7       | 29.4       | 29.1       | 31.9       | 26.0       | 26.6       | 24.3        | 28.4        | 0.0     | -4.1      | 5.5E-12       |
| CD99       | 23.4     | 22.6     | NaN      | NaN      | 21.8     | NaN      | 22.3     | 22.1     | 22.6     | 22.5     | 23.9     | 22.3     | 24.8     | 23.5     | 25.4       | 27.0       | 26.3       | 27.1       | 26.0       | 27.9       | 22.6        | 26.7        | 0.0     | -4.1      | 9.2E-12       |
| CSRP1      | 25.0     | 22.5     | NaN      | 22.9     | 23.9     | 24.6     | 25.4     | 24.4     | 22.6     | 25.0     | 25.2     | 23.8     | 26.3     | 26.1     | 25.6       | 28.5       | 28.7       | 26.6       | 29.1       | 29.2       | 24.6        | 28.6        | 0.0     | -4.0      | 2.2E-11       |
| ALDH1L2    | 20.7     | NaN      | 22.4     | NaN      | NaN      | NaN      | NaN      | 19.8     | 21.6     | 21.6     | 21.1     | 20.7     | 20.3     | NaN      | 22.3       | 24.5       | 25.3       | 21.3       | 25.5       | 29.8       | 20.9        | 24.9        | 0.0     | -4.0      | 2.8E-11       |
| CRIP2      | 23.6     | 24.2     | 21.8     | NaN      | NaN      | NaN      | NaN      | NaN      | NaN      | 26.3     | 26.8     | 25.1     | 26.2     | 26.2     | 28.0       | 31.0       | 29.9       | 29.6       | 27.6       | 29.5       | 25.6        | 29.6        | 0.0     | -3.9      | 5.0E-11       |
| MAP1A      | 22.2     | 22.4     | 25.0     | 22.8     | 21.1     | 22.3     | 24.3     | 20.4     | 21.5     | 23.6     | 23.9     | 22.0     | 23.7     | 23.4     | 23.5       | 29.0       | 27.2       | 27.5       | 23.1       | 25.8       | 22.6        | 26.5        | 0.0     | -3.9      | 5.1E-11       |
| PDLIM4     | 19.8     | 20.5     | 21.5     | NaN      | 20.5     | 21.5     | NaN      | NaN      | 21.0     | 20.7     | 21.7     | 20.2     | 22.2     | 22.6     | 22.7       | 28.2       | 25.6       | 21.7       | 24.2       | 28.9       | 21.0        | 24.9        | 0.0     | -3.8      | 1.1E-10       |
| COL5A2     | 24.3     | 22.3     | 23.3     | 23.9     | 23.3     | 24.9     | 24.2     | 24.1     | 25.9     | 23.4     | 23.8     | 22.2     | 24.4     | 22.9     | 23.9       | 28.9       | 27.4       | 27.3       | 27.4       | 28.9       | 23.9        | 27.4        | 0.0     | -3.5      | 2.9E-09       |
| ABAT       | 21.7     | NaN      | 23.6     | 21.6     | 22.0     | NaN      | 22.0     | NaN      | 23.4     | 24.5     | 24.8     | 21.6     | 23.7     | 24.6     | 25.0       | 29.7       | 27.5       | 26.9       | 21.9       | 26.8       | 23.4        | 26.8        | 0.0     | -3.4      | 8.7E-09       |
| GPX7       | 23.5     | 21.5     | 23.0     | 25.1     | 23.7     | 23.9     | 23.8     | 22.3     | 23.3     | 23.7     | 24.5     | 22.4     | 24.7     | 24.1     | 25.1       | 27.1       | 29.2       | 27.0       | 27.0       | 29.9       | 23.7        | 27.1        | 0.0     | -3.4      | 9.1E-09       |
| CAPN2      | 21.3     | 24.1     | 25.9     | 25.0     | 22.9     | 25.1     | 24.5     | 25.7     | 24.4     | 25.7     | 25.6     | 25.9     | 26.5     | 25.0     | 26.7       | 30.4       | 28.2       | 29.3       | 28.7       | 27.9       | 25.1        | 28.4        | 0.0     | -3.4      | 1.4E-08       |
| CAP2       | 25.2     | 26.2     | 25.8     | 25.8     | 24.7     | 25.8     | 26.3     | 24.8     | 25.9     | 26.2     | 26.4     | 25.4     | 26.8     | 26.3     | 27.6       | 30.5       | 29.4       | 29.5       | 28.6       | 28.9       | 25.8        | 29.2        | 0.0     | -3.4      | 1.5E-08       |
| GSTM2      | 24.9     | 23.4     | 24.4     | 24.6     | 22.5     | 23.7     | 24.4     | 25.3     | 24.0     | 25.2     | 25.0     | 24.2     | 25.8     | 24.8     | 26.4       | 29.2       | 28.4       | 27.0       | 27.3       | 28.4       | 24.5        | 27.9        | 0.0     | -3.4      | 1.6E-08       |
| NCAM1      | NaN      | 23.7     | 24.0     | NaN      | 22.5     | NaN      | NaN      | NaN      | NaN      | 23.6     | 25.5     | 24.2     | 24.9     | 24.4     | 26.0       | 29.1       | 27.5       | 26.7       | 27.3       | 27.9       | 24.1        | 27.4        | 0.0     | -3.3      | 2.1E-08       |
| PBK        | 23.9     | 23.4     | 24.2     | 23.0     | NaN      | 22.6     | 21.9     | 23.3     | NaN      | 24.2     | 24.2     | 23.2     | 23.6     | 24.1     | 25.9       | 26.9       | 27.3       | 27.3       | 26.8       | 25.9       | 23.5        | 26.8        | 0.0     | -3.3      | 3.0E-08       |
| EPM2AIP1   | 22.0     | 21.7     | NaN      | NaN      | NaN      | 22.4     | 21.1     | 21.4     | 22.3     | 22.4     | 23.2     | 22.2     | 23.3     | 21.2     | 23.8       | 27.2       | 24.6       | 24.8       | 25.9       | 28.2       | 22.2        | 25.3        | 0.0     | -3.2      | 9.5E-08       |
| DPYSL5     | 26.7     | 28.5     | 26.4     | 24.1     | 25.3     | 24.7     | 26.6     | 25.8     | 27.3     | 29.3     | 30.0     | 27.1     | 29.0     | 29.5     | 29.8       | 32.4       | 30.2       | 32.1       | 28.6       | 28.4       | 26.9        | 30.0        | 0.0     | -3.1      | 1.2E-07       |

|          |      |      |      |      |      |      |      |      |      |      |      |      |      |      |      |      |      |      |      |      |      |      |     |      |         |
|----------|------|------|------|------|------|------|------|------|------|------|------|------|------|------|------|------|------|------|------|------|------|------|-----|------|---------|
| STX12    | 23.0 | 22.6 | 22.8 | NaN  | 23.1 | NaN  | NaN  | 22.4 | 23.5 | 23.8 | 23.6 | 23.3 | 22.0 | 23.6 | 24.1 | 27.9 | 23.4 | 27.1 | 26.4 | 26.0 | 23.1 | 26.2 | 0.0 | -3.1 | 1.8E-07 |
| CELF2    | 24.5 | 23.9 | 25.3 | 25.7 | 23.8 | 24.2 | 24.9 | 23.7 | 25.0 | 25.3 | 24.9 | 26.5 | 24.9 | 23.7 | 25.6 | 27.8 | 24.5 | 28.5 | 28.1 | 28.7 | 24.9 | 27.9 | 0.0 | -3.1 | 2.0E-07 |
| RHOB     | 21.9 | NaN  | NaN  | 22.9 | 22.6 | NaN  | NaN  | 22.4 | NaN  | 22.7 | 22.8 | 22.1 | 22.9 | 23.0 | 25.1 | 27.4 | 23.9 | 27.3 | 26.1 | 25.4 | 22.7 | 25.7 | 0.0 | -3.0 | 3.1E-07 |
| COL4A2   | 22.0 | NaN  | 22.1 | 23.0 | 22.7 | 21.9 | 22.6 | 21.2 | 23.2 | 23.2 | 23.1 | 23.0 | 23.1 | 22.3 | 24.5 | 26.0 | 25.4 | 26.9 | 24.3 | 27.0 | 22.7 | 25.7 | 0.0 | -3.0 | 3.2E-07 |
| ARHGAP18 | NaN  | NaN  | 21.2 | 20.5 | 20.8 | NaN  | 21.8 | NaN  | 20.9 | 21.1 | 20.7 | NaN  | 22.2 | 20.6 | 22.9 | 22.5 | 21.8 | 24.8 | 26.0 | 26.7 | 20.9 | 23.9 | 0.0 | -2.9 | 5.4E-07 |
| FAM114A1 | 21.0 | 24.5 | NaN  | 20.8 | 21.3 | 21.2 | 22.2 | 22.2 | 21.5 | 21.4 | 21.9 | 19.9 | 21.4 | 21.6 | 21.1 | 27.6 | 27.0 | 23.4 | 22.1 | 25.2 | 21.4 | 24.3 | 0.0 | -2.9 | 7.2E-07 |
| ANXA2    | 31.5 | 31.1 | 30.8 | 32.2 | 31.4 | 31.2 | 32.4 | 31.6 | 31.2 | 30.7 | 31.1 | 31.4 | 31.6 | 32.4 | 31.8 | 34.7 | 34.0 | 34.9 | 33.9 | 34.6 | 31.4 | 34.3 | 0.0 | -2.9 | 8.0E-07 |
| PLOD2    | 25.8 | 24.5 | 21.7 | 22.4 | 25.7 | 24.4 | 25.7 | 23.9 | 24.8 | 23.5 | 25.5 | 23.8 | 25.2 | 25.2 | 23.8 | 28.3 | 30.6 | 25.0 | 26.8 | 29.5 | 24.7 | 27.5 | 0.0 | -2.9 | 1.2E-06 |
| CD44     | 21.9 | 22.1 | NaN  | 21.9 | 22.0 | 22.2 | NaN  | NaN  | 21.5 | 21.7 | 21.9 | NaN  | NaN  | 23.5 | 24.0 | 26.7 | 27.5 | 24.3 | 24.1 | 25.1 | 21.9 | 24.7 | 0.0 | -2.7 | 2.9E-06 |
| SUN2     | 24.7 | 24.4 | 23.1 | 22.8 | 23.5 | NaN  | 23.3 | 23.6 | 23.7 | 25.8 | 24.7 | 25.0 | 24.6 | 25.6 | 26.1 | 27.7 | 26.9 | 25.3 | 27.3 | 28.0 | 24.4 | 27.1 | 0.0 | -2.7 | 3.9E-06 |
| ME1      | 24.6 | 27.3 | 26.8 | 27.0 | 23.4 | NaN  | 26.5 | 26.0 | 24.5 | 24.0 | 26.4 | 25.9 | 24.6 | 25.3 | 26.3 | 28.0 | 29.3 | 29.5 | 26.3 | 29.4 | 25.9 | 28.6 | 0.0 | -2.7 | 4.7E-06 |
| ITGA11   | NaN  | 22.3 | 22.7 | 22.9 | NaN  | NaN  | 22.2 | NaN  | 22.3 | 21.8 | 22.6 | 22.2 | 22.8 | 23.0 | 23.9 | 27.6 | 26.4 | 28.0 | 23.8 | 23.9 | 22.5 | 25.1 | 0.0 | -2.6 | 5.8E-06 |
| ACSS2    | 24.9 | 25.8 | 27.3 | 27.6 | 25.3 | 26.0 | 25.8 | 25.7 | 25.5 | 25.2 | 26.7 | 25.1 | 26.8 | 26.8 | 26.9 | 28.1 | 28.6 | 29.6 | 28.6 | 28.3 | 25.8 | 28.4 | 0.0 | -2.6 | 6.3E-06 |
| FNDC3A   | NaN  | NaN  | 24.1 | 24.1 | NaN  | 21.8 | NaN  | 22.2 | 22.2 | 22.5 | NaN  | 22.3 | NaN  | 23.8 | 22.7 | 23.5 | 26.5 | 27.4 | 23.5 | 26.8 | 22.4 | 25.0 | 0.0 | -2.6 | 7.1E-06 |
| FLNC     | 27.4 | 26.9 | 25.2 | 28.8 | 28.1 | 25.2 | 27.6 | 27.3 | 26.4 | 27.2 | 27.1 | 28.9 | 27.8 | 28.9 | 29.4 | 31.1 | 29.4 | 31.0 | 28.7 | 30.6 | 27.4 | 30.0 | 0.0 | -2.6 | 7.2E-06 |
| COMMD2   | 21.5 | NaN  | 22.1 | 21.7 | 22.1 | 22.0 | 22.2 | 21.9 | 21.4 | 21.6 | 23.3 | 21.9 | 22.0 | 21.8 | 23.6 | 25.1 | 25.3 | 23.1 | 24.0 | 25.2 | 21.9 | 24.5 | 0.0 | -2.6 | 9.6E-06 |
| CFL2     | 24.5 | 25.0 | 25.7 | 25.3 | 23.8 | 23.9 | 25.1 | 25.2 | 25.1 | 25.8 | 26.0 | 25.8 | 25.8 | 25.0 | 26.3 | 28.0 | 27.4 | 28.4 | 28.0 | 27.1 | 25.1 | 27.7 | 0.0 | -2.6 | 9.9E-06 |
| ITGA5    | 23.8 | NaN  | 23.6 | 23.4 | 23.5 | 24.0 | 23.5 | 23.4 | NaN  | 24.2 | 24.3 | 23.2 | 24.8 | 23.1 | 25.1 | 27.1 | 27.6 | 27.3 | 24.9 | 25.1 | 23.6 | 26.1 | 0.0 | -2.6 | 1.1E-05 |
| SNX18    | 23.0 | 21.4 | 21.4 | 23.0 | 23.0 | NaN  | 21.7 | 22.3 | 22.0 | 23.0 | 23.2 | 22.0 | 22.6 | 23.0 | 23.2 | 24.8 | 27.3 | 26.2 | 23.1 | 25.6 | 22.6 | 25.2 | 0.0 | -2.6 | 1.2E-05 |
| RELA     | 23.8 | NaN  | 23.3 | 23.2 | 23.8 | NaN  | 23.3 | 23.2 | 23.0 | 23.8 | 23.6 | 23.4 | 23.7 | 23.7 | 24.3 | 26.3 | 25.9 | 26.1 | 26.4 | 26.0 | 23.5 | 26.1 | 0.0 | -2.5 | 1.4E-05 |
| HPCAL1   | NaN  | NaN  | 21.0 | 20.5 | NaN  | NaN  | NaN  | 20.9 | NaN  | 21.4 | 22.3 | 20.5 | 23.0 | 21.5 | 23.9 | 25.8 | 21.8 | 23.6 | 23.4 | 26.4 | 21.2 | 23.7 | 0.0 | -2.5 | 1.5E-05 |
| CADM1    | 24.5 | 24.7 | 24.1 | 25.6 | 25.5 | 23.9 | 24.5 | 24.4 | 25.0 | 24.5 | 24.7 | 24.7 | 24.9 | 24.7 | 25.5 | 27.5 | 27.2 | 27.9 | 26.8 | NaN  | 24.7 | 27.2 | 0.0 | -2.5 | 1.5E-05 |
| IKBIP    | 23.7 | 24.7 | 23.7 | 23.9 | 24.0 | 24.0 | 24.4 | 23.4 | 23.1 | 23.8 | 23.4 | 24.5 | 23.6 | 23.7 | 25.2 | 27.1 | 25.9 | NaN  | 26.3 | 27.7 | 23.8 | 26.3 | 0.0 | -2.5 | 1.6E-05 |
| VIM      | 31.5 | 33.9 | 33.7 | 33.7 | 33.5 | 31.7 | 33.2 | 33.4 | 33.7 | 33.3 | 34.0 | 34.0 | 34.4 | 34.8 | 35.5 | 37.6 | 36.6 | 36.8 | 35.7 | 35.7 | 33.7 | 36.2 | 0.0 | -2.5 | 1.7E-05 |
| KDEL2    | 24.9 | 24.4 | 24.6 | 25.3 | 24.0 | NaN  | 25.1 | 25.0 | 24.5 | 25.0 | 25.1 | 24.1 | 25.9 | 24.8 | 26.7 | 27.3 | 27.6 | 27.1 | 27.4 | 29.0 | 24.9 | 27.4 | 0.0 | -2.5 | 1.9E-05 |
| PARVA    | 25.3 | 26.5 | 25.0 | 26.2 | 25.0 | 24.5 | 25.9 | 26.1 | 25.3 | 25.3 | 26.3 | 25.4 | 26.4 | 26.8 | 26.7 | 28.3 | 28.5 | 28.7 | 27.5 | 27.9 | 25.6 | 28.1 | 0.0 | -2.5 | 2.0E-05 |
| CAMK2D   | 26.1 | 27.3 | 27.1 | 25.1 | 26.4 | 26.0 | 26.2 | 26.4 | 26.3 | 26.8 | 27.4 | 26.8 | 27.8 | 27.5 | 28.4 | 30.7 | 28.7 | 30.3 | 29.2 | 29.0 | 26.6 | 29.1 | 0.0 | -2.5 | 2.3E-05 |
| LRRC57   | 21.9 | 23.5 | 22.5 | 22.8 | NaN  | NaN  | 22.7 | 23.2 | 22.2 | 22.4 | 22.3 | 22.3 | 22.2 | 22.4 | 24.2 | 24.8 | 24.4 | 25.4 | 24.8 | 24.9 | 22.4 | 24.8 | 0.0 | -2.5 | 2.3E-05 |
| GNG12    | 24.8 | 24.9 | 24.0 | 25.3 | 25.0 | 25.3 | 25.4 | 24.7 | 24.8 | 24.6 | 24.7 | 25.0 | 25.5 | 25.2 | 25.5 | 26.9 | 27.1 | 27.8 | 27.9 | 27.9 | 25.0 | 27.4 | 0.0 | -2.5 | 2.3E-05 |
| PTGFRN   | 20.9 | 23.1 | 22.8 | 20.9 | 21.1 | NaN  | NaN  | NaN  | NaN  | 21.5 | 21.5 | 20.5 | 23.1 | 20.8 | 22.8 | 24.6 | 25.9 | 22.9 | 22.6 | 29.2 | 21.3 | 23.8 | 0.0 | -2.4 | 2.5E-05 |
| AFAP1    | 21.0 | 21.1 | NaN  | NaN  | 21.3 | NaN  | NaN  | 20.3 | 20.9 | 21.6 | NaN  | 21.2 | 22.9 | 21.3 | 23.0 | 24.1 | 23.4 | 24.7 | 23.9 | 22.0 | 21.2 | 23.7 | 0.0 | -2.4 | 2.8E-05 |
| RANBP6   | NaN  | 22.5 | 21.8 | 23.6 | 22.3 | 23.0 | 22.5 | 20.7 | NaN  | 22.4 | 22.7 | 22.6 | 22.5 | NaN  | 23.4 | 25.2 | 25.3 | 25.0 | 24.8 | 24.8 | 22.5 | 24.9 | 0.0 | -2.4 | 3.0E-05 |
| PTGR1    | 24.6 | 24.2 | 25.8 | 25.5 | 26.0 | 24.8 | 25.9 | 25.7 | 24.6 | 25.1 | 24.6 | 24.4 | 27.1 | 24.7 | 24.9 | 27.2 | 27.7 | 28.0 | 26.9 | 27.6 | 25.0 | 27.4 | 0.0 | -2.4 | 3.3E-05 |
| HSPA4L   | 23.2 | 22.6 | 23.5 | 23.5 | 24.9 | 22.7 | 23.6 | NaN  | 22.8 | 24.0 | 23.7 | NaN  | 23.0 | 22.9 | 23.5 | 25.3 | 26.7 | 25.8 | NaN  | 25.8 | 23.4 | 25.8 | 0.0 | -2.4 | 3.6E-05 |
| LNP      | NaN  | NaN  | 21.7 | 22.2 | 21.5 | NaN  | 21.9 | NaN  | 22.3 | 23.0 | NaN  | 25.9 | 22.8 | 22.5 | 23.9 | 25.1 | 24.8 | 24.9 | 23.5 | 24.5 | 22.3 | 24.6 | 0.0 | -2.4 | 3.9E-05 |
| ARSA     | 22.5 | 22.6 | 23.1 | 22.4 | 24.1 | 25.0 | 22.7 | NaN  | 22.8 | 22.3 | 22.3 | 22.9 | 22.0 | 22.3 | 23.1 | 26.3 | 25.2 | 24.0 | 24.6 | 26.4 | 22.6 | 24.9 | 0.0 | -2.3 | 6.0E-05 |
| LMF2     | 24.1 | 23.2 | 23.9 | 23.0 | 24.5 | 23.3 | 24.0 | 22.2 | 23.9 | 23.7 | 24.8 | 23.3 | 24.2 | 23.8 | 24.2 | 27.8 | 26.1 | 26.2 | 23.9 | 26.3 | 23.8 | 26.2 | 0.0 | -2.3 | 6.1E-05 |
| CDH11    | 21.9 | 22.8 | NaN  | 22.3 | NaN  | 21.7 | 21.4 | 21.4 | 21.9 | 23.3 | 22.0 | 21.8 | 23.0 | 22.9 | 22.9 | 23.7 | 24.8 | 23.6 | 24.8 | 27.9 | 22.0 | 24.2 | 0.0 | -2.3 | 9.3E-05 |
| VPS13C   | 22.2 | NaN  | NaN  | 23.1 | 23.0 | NaN  | 24.3 | NaN  | 23.8 | 23.3 | 22.6 | NaN  | 23.0 | NaN  | 23.3 | 25.8 | 25.0 | 24.9 | 25.7 | 27.3 | 23.1 | 25.3 | 0.0 | -2.3 | 9.4E-05 |
| H2AFY2   | 26.9 | 28.4 | 27.6 | 26.3 | 26.2 | 26.1 | 26.4 | 26.9 | 26.6 | 28.5 | 28.9 | 27.7 | 28.5 | 27.8 | 29.5 | 29.4 | 29.7 | 29.5 | 29.0 | 29.6 | 27.3 | 29.5 | 0.0 | -2.2 | 1.0E-04 |
| B3GALT1  | NaN  | NaN  | 23.9 | 24.0 | 23.6 | NaN  | 22.4 | NaN  | 23.4 | 23.5 | 23.4 | NaN  | 22.8 | 23.0 | 25.7 | 25.2 | 24.0 | 26.9 | NaN  | 26.0 | 23.4 | 25.7 | 0.0 | -2.2 | 1.1E-04 |
| RAB31    | 25.2 | 23.8 | 23.0 | 23.9 | 23.9 | 24.3 | 23.6 | 24.3 | 23.6 | 25.5 | 25.4 | 24.8 | 24.7 | 24.3 | 25.4 | 28.5 | 23.9 | 27.2 | 26.5 | 26.4 | 24.3 | 26.5 | 0.0 | -2.2 | 1.4E-04 |

|           |      |      |      |      |      |      |      |      |      |      |      |      |      |      |      |      |      |      |      |      |      |      |     |      |         |
|-----------|------|------|------|------|------|------|------|------|------|------|------|------|------|------|------|------|------|------|------|------|------|------|-----|------|---------|
| CNPY4     | 23.8 | 25.3 | 23.7 | 23.8 | 24.1 | 24.3 | 23.9 | 24.6 | 23.8 | 24.0 | 23.9 | NaN  | 23.4 | 23.7 | 24.2 | 26.6 | 26.1 | NaN  | NaN  | 26.0 | 23.9 | 26.1 | 0.0 | -2.2 | 1.4E-04 |
| TSPAN3    | 20.9 | 23.2 | 24.6 | 24.5 | NaN  | NaN  | 20.9 | NaN  | NaN  | 24.4 | 24.6 | 24.1 | 23.6 | 21.9 | 24.9 | 26.6 | 26.0 | 26.3 | NaN  | 25.4 | 23.8 | 26.0 | 0.0 | -2.2 | 1.5E-04 |
| FNDC3B    | 23.2 | 23.4 | 23.8 | 25.2 | 22.7 | NaN  | 23.9 | 24.5 | 23.5 | 23.4 | 23.7 | 24.0 | 22.7 | 24.5 | 23.9 | 25.7 | 26.3 | 26.0 | 24.6 | 27.1 | 23.7 | 25.8 | 0.0 | -2.2 | 1.5E-04 |
| RND3      | 20.9 | 21.1 | 21.3 | NaN  | 21.2 | 21.8 | NaN  | 21.1 | NaN  | 21.0 | NaN  | 21.9 | 22.2 | NaN  | 22.7 | 23.0 | 21.7 | 24.2 | 23.8 | 23.6 | 21.2 | 23.3 | 0.0 | -2.2 | 1.6E-04 |
| GSTK1     | 25.1 | 23.5 | 25.7 | 24.4 | 24.6 | 23.9 | 23.4 | 25.1 | 25.4 | 25.6 | 25.5 | 26.2 | 25.9 | 25.5 | 25.4 | 28.2 | 27.7 | 27.1 | 27.3 | 27.6 | 25.3 | 27.4 | 0.0 | -2.2 | 1.7E-04 |
| FAM120A   | 25.8 | 26.3 | 25.8 | 26.4 | 26.2 | 26.0 | 26.6 | 26.2 | 26.0 | 26.1 | 26.1 | 25.2 | 26.0 | 25.7 | 26.5 | 28.1 | 28.4 | 27.7 | 28.3 | 28.9 | 26.0 | 28.2 | 0.0 | -2.2 | 1.7E-04 |
| ALCAM     | 26.5 | 26.9 | 27.9 | 27.7 | 26.3 | 25.7 | 26.4 | 26.4 | 26.9 | 26.6 | 26.6 | 26.9 | 26.7 | 26.9 | 27.5 | 28.7 | 31.0 | 28.7 | 29.0 | 30.8 | 26.7 | 28.8 | 0.0 | -2.1 | 1.9E-04 |
| ZNF428    | 24.8 | 25.3 | 25.5 | 25.0 | 25.1 | 25.3 | 24.8 | 24.7 | 25.2 | 25.8 | 25.9 | 25.1 | 24.8 | 25.3 | 27.1 | 28.2 | 27.3 | 27.3 | 26.8 | 27.5 | 25.1 | 27.3 | 0.0 | -2.1 | 2.2E-04 |
| MARCKS    | 27.2 | 27.3 | 28.6 | 27.8 | 27.2 | 26.9 | 27.6 | 26.9 | 27.1 | 28.4 | 28.4 | 27.7 | 28.7 | 28.2 | 29.0 | 30.3 | 29.5 | 31.5 | 29.8 | 29.8 | 27.7 | 29.8 | 0.0 | -2.1 | 2.2E-04 |
| ACOT1     | 26.1 | 26.0 | 25.2 | 26.8 | 25.6 | 25.6 | 25.7 | 25.7 | 25.3 | 25.0 | 25.6 | 25.4 | 26.2 | 25.9 | 26.5 | 27.0 | 28.1 | 27.5 | 28.3 | 29.4 | 25.6 | 27.8 | 0.0 | -2.1 | 2.2E-04 |
| NIPSNAP3A | 24.4 | NaN  | 23.9 | 24.2 | NaN  | 23.4 | 24.7 | 24.0 | 24.3 | 24.8 | 25.1 | 24.3 | 25.6 | 24.4 | 25.1 | 27.7 | 26.6 | 26.3 | 26.1 | 28.3 | 24.3 | 26.5 | 0.0 | -2.1 | 2.3E-04 |
| CD63      | 25.7 | 24.5 | 25.9 | 26.2 | 23.3 | 22.8 | 25.0 | 24.4 | 24.8 | 26.3 | 24.5 | 26.5 | 25.4 | 24.8 | 25.8 | 27.7 | 26.7 | 27.9 | 26.8 | 27.3 | 24.9 | 27.0 | 0.0 | -2.1 | 2.4E-04 |
| CA2       | 25.0 | 24.1 | 23.7 | 24.1 | 23.3 | 24.8 | 24.3 | NaN  | 23.6 | 24.5 | 24.5 | NaN  | 23.5 | 25.4 | 24.5 | 27.9 | 26.7 | 25.1 | 26.4 | 26.2 | 24.2 | 26.3 | 0.0 | -2.1 | 2.4E-04 |
| AKT1      | 23.5 | 24.6 | 23.5 | 24.8 | 23.6 | 24.7 | 23.6 | 25.1 | 23.1 | 23.9 | 24.0 | 24.2 | 24.3 | 23.2 | 24.5 | 25.7 | 25.9 | 26.0 | 26.0 | 27.4 | 23.9 | 26.0 | 0.0 | -2.1 | 2.9E-04 |
| SDC2      | 23.8 | 22.7 | 23.1 | 24.4 | 23.2 | 24.3 | 23.3 | NaN  | 23.6 | 25.2 | 23.9 | 23.9 | 24.3 | 24.0 | 23.9 | 26.2 | 25.8 | 27.8 | 26.1 | 25.3 | 23.9 | 26.0 | 0.0 | -2.1 | 3.0E-04 |
| CAT       | 26.1 | 25.7 | 25.8 | 26.7 | 26.3 | 26.9 | 26.0 | 26.4 | 26.0 | 25.9 | 26.1 | 26.0 | 26.4 | 25.9 | 26.7 | 28.2 | 28.7 | 27.2 | 27.9 | 28.9 | 26.0 | 28.1 | 0.0 | -2.0 | 3.7E-04 |
| CAST      | 23.7 | 23.1 | 22.7 | 22.7 | 20.8 | 22.4 | 25.1 | 24.4 | 23.1 | 23.7 | 23.7 | 22.7 | 23.1 | 23.7 | 24.4 | 25.0 | 28.2 | 24.6 | 25.3 | 28.2 | 23.1 | 25.1 | 0.0 | -2.0 | 3.8E-04 |
| ANK2      | 25.2 | 23.2 | 25.5 | 25.5 | 24.7 | 22.2 | 25.5 | 26.1 | 25.3 | 25.8 | 25.3 | 26.2 | 26.4 | 23.9 | 26.7 | 29.7 | 25.5 | 26.8 | 29.4 | 28.0 | 25.4 | 27.4 | 0.0 | -2.0 | 3.9E-04 |
| ANXA6     | 30.5 | 30.7 | 30.9 | 30.6 | 30.3 | 30.5 | 31.0 | 31.1 | 30.5 | 30.8 | 30.9 | 31.0 | 31.6 | 31.0 | 31.5 | 33.4 | 33.0 | 32.7 | 32.2 | 33.5 | 30.8 | 32.9 | 0.0 | -2.0 | 4.4E-04 |
| FARP1     | 26.2 | 26.5 | 26.6 | 25.0 | 26.3 | 26.7 | 25.0 | 26.3 | 23.8 | 25.3 | 26.1 | 26.8 | 26.4 | 26.5 | 27.1 | 28.7 | 27.9 | 27.8 | 28.7 | 30.0 | 26.3 | 28.3 | 0.0 | -2.0 | 4.8E-04 |
| LMNA      | 29.4 | 29.3 | 28.9 | 29.8 | 29.2 | 29.5 | 29.7 | 29.3 | 29.2 | 29.4 | 29.2 | 29.6 | 29.0 | 29.6 | 30.1 | 32.1 | 31.2 | 31.4 | 31.3 | 32.6 | 29.4 | 31.4 | 0.0 | -2.0 | 4.9E-04 |
| DOCK7     | 25.3 | 25.7 | 25.7 | 25.9 | 25.5 | 25.6 | 24.5 | 26.2 | 25.5 | 25.7 | 26.0 | 25.9 | 27.1 | 25.9 | 26.9 | 27.8 | 28.2 | 28.2 | 26.9 | 27.5 | 25.7 | 27.7 | 0.0 | -2.0 | 4.9E-04 |
| CDK6      | 24.7 | 24.6 | 24.6 | 24.9 | 23.6 | 22.3 | 24.3 | 24.8 | 24.5 | 25.9 | 26.1 | 26.0 | 26.1 | 26.4 | 26.4 | 29.0 | 26.6 | 28.5 | 26.8 | 24.9 | 24.8 | 26.7 | 0.0 | -2.0 | 5.1E-04 |
| CBFB      | 23.4 | 24.5 | 23.4 | 23.4 | NaN  | NaN  | 23.8 | 24.1 | 23.5 | 25.2 | 24.0 | 24.2 | 23.9 | 23.4 | 25.6 | 24.3 | 26.1 | 25.2 | 26.1 | 26.2 | 23.8 | 25.8 | 0.0 | -2.0 | 5.1E-04 |
| PON2      | 25.2 | 24.2 | 25.4 | 25.8 | 24.6 | 23.4 | 25.4 | 25.5 | 25.1 | 25.8 | 26.7 | 26.2 | 26.9 | 26.4 | 26.9 | 31.2 | 27.3 | 28.1 | 25.7 | 27.4 | 25.4 | 27.4 | 0.0 | -2.0 | 5.6E-04 |
| MVK       | 25.8 | 26.4 | 26.0 | 26.1 | 26.2 | 26.2 | 24.9 | 26.5 | 26.0 | 25.0 | 26.1 | 26.0 | 25.8 | 26.4 | 26.7 | 28.6 | 28.0 | 27.9 | 28.1 | 28.0 | 26.0 | 28.0 | 0.0 | -1.9 | 6.2E-04 |
| ACSL1     | 24.8 | 24.7 | 25.3 | 23.5 | 22.3 | 22.7 | 24.8 | 24.2 | 24.3 | 23.4 | 22.8 | 25.3 | 24.2 | 24.3 | 24.8 | 25.8 | 26.5 | 23.7 | 26.9 | 28.7 | 24.2 | 26.2 | 0.0 | -1.9 | 6.3E-04 |
| TCAF1     | 24.6 | 23.6 | 25.2 | 23.5 | 24.3 | 23.3 | 24.8 | 23.2 | 24.5 | 24.7 | 24.9 | 24.8 | 24.9 | 24.2 | 25.1 | 26.1 | 27.2 | 27.1 | 26.8 | 25.9 | 24.5 | 26.4 | 0.0 | -1.9 | 6.8E-04 |
| HP1BP3    | 27.5 | 28.1 | 27.7 | 27.6 | 28.1 | 28.6 | 27.6 | 27.8 | 27.9 | 28.0 | 28.6 | 28.3 | 28.5 | 28.2 | 29.4 | 30.8 | 30.3 | 29.6 | 29.6 | 30.6 | 28.0 | 30.0 | 0.0 | -1.9 | 7.0E-04 |
| RP2       | 23.3 | 23.3 | 23.2 | 24.2 | 23.6 | 22.3 | 23.5 | 20.5 | 23.6 | 23.2 | 23.8 | 23.5 | 23.3 | 23.6 | 23.0 | 27.5 | 25.7 | 26.9 | 25.0 | 23.9 | 23.4 | 25.3 | 0.0 | -1.9 | 7.3E-04 |
| CLN5      | 22.6 | NaN  | 22.9 | 24.3 | 22.0 | NaN  | 22.3 | NaN  | 21.7 | 22.6 | 22.4 | NaN  | 22.5 | 22.5 | 22.8 | 26.0 | 22.9 | 26.2 | 22.9 | 26.8 | 22.5 | 24.4 | 0.0 | -1.9 | 7.6E-04 |
| LDLR      | 23.7 | 23.5 | 24.0 | 23.9 | 24.2 | 24.1 | 23.7 | NaN  | 24.3 | 24.8 | 24.7 | 24.6 | 23.6 | 23.3 | 25.5 | 26.2 | 26.0 | 27.1 | 25.9 | 23.1 | 24.0 | 26.0 | 0.0 | -1.9 | 7.6E-04 |
| COMMD8    | 23.9 | 25.2 | 23.5 | 23.8 | 24.5 | 25.0 | 23.6 | 24.2 | 24.7 | 24.9 | 24.5 | 24.6 | 24.1 | 23.9 | 25.0 | 26.3 | 26.1 | 26.4 | 26.5 | 25.9 | 24.3 | 26.2 | 0.0 | -1.9 | 7.8E-04 |
| HMG2      | 26.2 | 24.5 | 28.0 | 27.5 | 25.9 | 26.3 | 26.4 | 24.4 | 26.1 | 27.7 | 28.1 | 26.1 | 27.9 | 26.7 | 27.8 | 28.3 | 28.7 | 28.8 | 27.8 | 28.2 | 26.4 | 28.3 | 0.0 | -1.9 | 7.9E-04 |
| LAMB1     | 26.0 | 27.1 | 27.5 | 28.8 | 25.2 | 25.5 | 26.9 | 26.9 | 26.4 | 27.5 | 27.6 | 29.0 | 27.2 | 27.3 | 28.5 | 29.1 | 29.8 | 29.0 | 28.5 | 29.2 | 27.1 | 29.1 | 0.0 | -1.9 | 7.9E-04 |
| ATL3      | 25.5 | 25.1 | 24.6 | 26.1 | 24.0 | 26.2 | 24.9 | 25.1 | 24.4 | 24.9 | 23.4 | 25.9 | 25.3 | 24.5 | 25.0 | 26.8 | 27.0 | 26.3 | 27.4 | 28.9 | 25.0 | 26.9 | 0.0 | -1.9 | 8.0E-04 |
| SCARB2    | 26.4 | 26.3 | 26.4 | 27.0 | 26.1 | 25.3 | 26.9 | 26.3 | 26.8 | 27.4 | 26.0 | 27.5 | 27.2 | 27.1 | 27.5 | 30.3 | 27.8 | 28.9 | 28.1 | 30.1 | 26.6 | 28.5 | 0.0 | -1.9 | 8.1E-04 |
| MAP7D1    | 23.7 | 23.8 | 22.6 | 23.8 | 24.1 | NaN  | 24.2 | 25.1 | 24.1 | 25.2 | 24.2 | 22.4 | 24.7 | 23.0 | 25.9 | 27.0 | 27.3 | 25.6 | 23.9 | 26.1 | 24.1 | 26.0 | 0.0 | -1.9 | 8.5E-04 |
| MEST      | 26.5 | 26.3 | 24.3 | 25.3 | 25.5 | 26.4 | 26.3 | 26.1 | 26.5 | 26.1 | 25.6 | 27.0 | 26.3 | 25.5 | 27.6 | 29.7 | 29.9 | 26.8 | 27.7 | 28.5 | 26.2 | 28.1 | 0.0 | -1.9 | 8.6E-04 |
| CEP170    | 25.7 | 25.5 | 25.4 | 24.9 | 25.7 | 26.0 | 25.3 | 24.4 | 25.5 | 26.5 | 26.5 | 24.2 | 25.7 | 26.3 | 27.2 | 28.1 | 27.8 | 26.5 | 27.2 | 27.9 | 25.6 | 27.5 | 0.0 | -1.9 | 9.2E-04 |
| SPARC     | 27.2 | 26.8 | 26.5 | 27.7 | 27.3 | 27.0 | 27.1 | 27.0 | 27.3 | 26.8 | 26.9 | 26.8 | 26.3 | 27.3 | 26.8 | 30.0 | 28.6 | 29.2 | 27.8 | 29.1 | 27.0 | 28.9 | 0.0 | -1.9 | 9.2E-04 |
| CRABP1    | 30.8 | 31.1 | 30.8 | 30.2 | 29.9 | 30.1 | 30.4 | 30.7 | 31.0 | 31.5 | 31.6 | 31.0 | 31.8 | 31.4 | 33.1 | 32.7 | 31.2 | 33.3 | 32.4 | 32.8 | 30.9 | 32.7 | 0.0 | -1.8 | 1.3E-03 |

|          |      |      |      |      |      |      |      |      |      |      |      |      |      |      |      |      |      |      |      |      |      |      |     |      |         |
|----------|------|------|------|------|------|------|------|------|------|------|------|------|------|------|------|------|------|------|------|------|------|------|-----|------|---------|
| ACTR10   | 24.1 | 24.6 | 25.1 | 24.9 | 23.8 | NaN  | 24.5 | 25.6 | 23.9 | 25.3 | 25.2 | 25.5 | 24.8 | 23.7 | 25.0 | 26.7 | 25.9 | 26.7 | 27.3 | 26.4 | 24.8 | 26.6 | 0.0 | -1.8 | 1.3E-03 |
| WHSC1    | 24.1 | 24.3 | 25.4 | 24.9 | 24.3 | 23.8 | 24.5 | 24.5 | 24.4 | 24.9 | 24.9 | 24.6 | 24.4 | 24.4 | 26.0 | 26.1 | 26.6 | 26.6 | 26.4 | 24.4 | 24.4 | 26.3 | 0.0 | -1.8 | 1.3E-03 |
| SMARCC2  | 26.5 | 26.8 | 26.7 | 26.3 | 26.0 | 25.7 | 26.7 | 27.2 | 26.7 | 26.7 | 27.2 | 27.0 | 27.0 | 26.9 | 27.5 | 29.0 | 28.4 | 28.6 | 28.0 | 28.6 | 26.7 | 28.5 | 0.0 | -1.8 | 1.3E-03 |
| HSPB1    | 28.4 | 28.7 | 27.6 | 27.6 | 27.7 | 28.5 | 28.6 | 28.6 | 28.5 | 28.6 | 28.5 | 27.9 | 28.1 | 28.5 | 29.3 | 31.6 | 30.5 | 30.0 | 29.8 | 31.6 | 28.5 | 30.3 | 0.0 | -1.8 | 1.6E-03 |
| TWF1     | 25.9 | 26.0 | 26.3 | 26.1 | 26.4 | 26.2 | 26.1 | 25.7 | 26.0 | 26.2 | 26.0 | 26.3 | 26.2 | 26.2 | 26.7 | 28.4 | 28.7 | 27.7 | 27.7 | 28.1 | 26.1 | 27.9 | 0.0 | -1.8 | 1.6E-03 |
| GNF      | 24.4 | 24.2 | 26.0 | 25.0 | 23.9 | 23.0 | 26.1 | 25.4 | 24.2 | 24.7 | 25.0 | 24.3 | 24.9 | 24.2 | 25.7 | 25.4 | 26.3 | 26.6 | 26.8 | 26.3 | 24.6 | 26.3 | 0.0 | -1.8 | 1.7E-03 |
| SCRN1    | 27.5 | 26.9 | 26.0 | 26.8 | 27.4 | 27.6 | 27.2 | 27.5 | 26.9 | 27.0 | 26.9 | 26.8 | 27.6 | 27.6 | 27.5 | 29.5 | 29.1 | 28.6 | 28.4 | 29.3 | 27.1 | 28.9 | 0.0 | -1.8 | 1.7E-03 |
| MMP14    | 25.1 | 25.5 | 25.0 | 26.1 | 25.8 | 25.1 | 25.7 | 25.7 | 25.0 | 25.4 | 25.6 | 25.3 | 25.8 | 25.5 | 25.0 | 27.8 | 27.4 | 27.1 | 26.0 | 27.5 | 25.5 | 27.2 | 0.0 | -1.8 | 1.7E-03 |
| ITGA2    | NaN  | NaN  | 24.5 | 22.8 | 22.5 | 22.0 | 24.5 | NaN  | 24.0 | 24.1 | 22.9 | 21.6 | 24.7 | 24.2 | 24.3 | 28.0 | 26.2 | 23.8 | NaN  | 25.8 | 24.0 | 25.8 | 0.0 | -1.8 | 1.7E-03 |
| DPY19L1  | 22.5 | 23.0 | NaN  | 22.7 | NaN  | NaN  | 22.4 | NaN  | 22.2 | 22.3 | 22.6 | NaN  | 23.2 | 22.8 | 23.2 | 25.1 | 24.8 | 23.9 | 23.5 | 26.7 | 22.6 | 24.3 | 0.0 | -1.8 | 1.8E-03 |
| INA      | NaN  | 24.1 | NaN  | NaN  | 22.4 | NaN  | 23.8 | 24.1 | 23.6 | 23.0 | 25.6 | 25.9 | 23.6 | 25.3 | 25.4 | 27.0 | NaN  | 24.4 | 25.7 | 26.9 | 23.9 | 25.7 | 0.0 | -1.8 | 1.8E-03 |
| GBA      | 25.5 | 25.7 | 25.5 | 26.4 | 24.9 | 26.5 | 25.5 | 25.5 | 25.4 | 25.0 | 25.1 | 26.1 | 25.3 | 25.8 | 25.7 | 28.7 | 27.4 | 27.2 | 27.2 | 28.9 | 25.5 | 27.3 | 0.0 | -1.7 | 1.8E-03 |
| TMX3     | 25.1 | 25.6 | 25.3 | 25.6 | 25.2 | 26.8 | 25.0 | 24.8 | 24.4 | 25.7 | 25.7 | 25.3 | 25.5 | 25.6 | 26.0 | 27.4 | 26.8 | 27.6 | 26.7 | 27.9 | 25.4 | 27.1 | 0.0 | -1.7 | 1.8E-03 |
| CRYZL1   | 24.6 | 24.5 | 25.8 | 25.6 | 23.9 | 24.2 | 25.5 | 24.5 | 24.6 | 25.4 | 25.5 | 25.4 | 25.9 | 23.9 | 26.2 | 27.1 | 26.8 | 27.4 | 26.6 | 26.7 | 25.0 | 26.7 | 0.0 | -1.7 | 2.0E-03 |
| TES      | 26.5 | 25.7 | 25.3 | 25.4 | 26.8 | 26.1 | 26.4 | 24.9 | 25.9 | 26.0 | 26.2 | 25.8 | 26.7 | 26.5 | 27.0 | 27.2 | 28.4 | 27.2 | 28.3 | 28.8 | 26.1 | 27.8 | 0.0 | -1.7 | 2.2E-03 |
| IDH2     | 30.0 | 30.2 | 29.2 | 29.7 | 29.8 | 29.7 | 29.9 | 30.0 | 29.6 | 30.0 | 30.4 | 30.0 | 30.9 | 30.2 | 31.5 | 31.8 | 31.4 | 31.5 | 32.5 | 33.4 | 30.0 | 31.7 | 0.0 | -1.7 | 2.2E-03 |
| PCYOX1L  | 24.3 | 24.7 | 24.1 | 23.4 | 23.5 | 23.1 | 23.6 | 22.9 | 23.9 | 25.2 | 24.8 | 25.9 | 25.8 | 25.8 | 25.5 | 25.8 | 24.5 | 26.0 | 26.5 | 27.4 | 24.2 | 25.9 | 0.0 | -1.7 | 2.2E-03 |
| CIRBP    | 28.4 | 27.7 | 27.6 | 27.7 | 28.9 | 29.3 | 27.9 | 28.1 | 28.2 | 28.0 | 28.7 | 27.7 | 27.8 | 28.0 | 29.5 | 30.2 | 30.1 | 28.7 | 28.6 | 30.0 | 28.0 | 29.7 | 0.0 | -1.7 | 2.3E-03 |
| SERPINB6 | 26.7 | 26.5 | 25.8 | 26.6 | 26.4 | 25.9 | 27.3 | 27.2 | 26.5 | 26.2 | 26.2 | 26.8 | 28.3 | 27.3 | 28.6 | 28.3 | 28.3 | 28.1 | 30.4 | 28.1 | 26.6 | 28.3 | 0.0 | -1.7 | 2.4E-03 |
| TTYH3    | 26.9 | 26.9 | 26.7 | 24.8 | 26.9 | 27.4 | 25.1 | 26.2 | 26.8 | 26.7 | 27.0 | 26.9 | 26.5 | 26.7 | 27.5 | 30.1 | 28.2 | 28.8 | 27.2 | 29.1 | 26.8 | 28.5 | 0.0 | -1.7 | 2.4E-03 |
| HAGH     | 24.5 | 23.8 | 24.5 | 24.1 | 23.7 | 24.2 | 24.5 | 24.5 | 24.5 | 24.3 | 24.5 | 24.1 | 24.7 | 24.3 | 24.8 | 27.0 | 25.3 | 26.5 | 26.0 | 26.2 | 24.4 | 26.1 | 0.0 | -1.7 | 2.4E-03 |
| PRAF2    | 25.0 | 25.9 | 25.3 | 25.9 | 25.1 | 24.5 | 25.2 | 24.1 | 25.3 | 25.8 | 25.7 | 25.2 | 25.5 | 25.7 | 26.2 | 27.7 | 27.1 | 27.2 | 26.6 | 26.8 | 25.3 | 27.0 | 0.0 | -1.7 | 2.4E-03 |
| PANK4    | 24.7 | 25.1 | 24.5 | 23.8 | 24.4 | 24.8 | 25.3 | 25.3 | 24.0 | 24.3 | 24.5 | 23.8 | 26.0 | 26.5 | 26.0 | 26.5 | 26.2 | 25.5 | 26.6 | 26.6 | 24.6 | 26.3 | 0.0 | -1.7 | 2.5E-03 |
| PDLIM7   | 27.6 | 27.8 | 28.3 | 27.5 | 28.0 | 27.9 | 27.3 | 27.6 | 27.6 | 28.4 | 28.1 | 27.3 | 27.1 | 27.5 | 28.1 | 29.8 | 29.6 | 29.8 | 28.8 | 28.9 | 27.6 | 29.3 | 0.0 | -1.7 | 2.5E-03 |
| NNT      | 27.4 | 27.8 | 27.4 | 28.0 | 27.5 | 26.9 | 27.5 | 27.3 | 27.8 | 28.1 | 28.0 | 28.6 | 27.9 | 27.7 | 29.0 | 29.5 | 29.4 | 29.5 | 30.1 | 30.5 | 27.8 | 29.5 | 0.0 | -1.7 | 2.7E-03 |
| COMMD4   | 22.1 | NaN  | 22.3 | 21.4 | NaN  | NaN  | 22.3 | NaN  | 22.2 | 22.2 | 23.0 | NaN  | 22.3 | 22.3 | 23.3 | 24.0 | 24.5 | 23.2 | NaN  | 24.1 | 22.3 | 24.0 | 0.0 | -1.7 | 2.7E-03 |
| YIF1B    | 25.3 | 25.1 | 25.8 | 26.5 | 25.1 | NaN  | 25.6 | 25.9 | 25.2 | 25.5 | 25.3 | 25.3 | 25.1 | 25.4 | 25.4 | 27.0 | 27.0 | 27.0 | 26.4 | 27.0 | 25.3 | 27.0 | 0.0 | -1.7 | 2.7E-03 |
| MMAB     | 25.2 | 25.0 | 25.6 | 25.4 | 25.1 | 24.8 | 24.4 | 24.2 | 24.8 | 25.5 | 25.4 | 25.5 | 25.6 | 25.3 | 26.5 | 27.3 | 26.6 | 27.0 | 26.7 | 27.1 | 25.2 | 26.9 | 0.0 | -1.7 | 2.8E-03 |
| CDH2     | 26.4 | 25.4 | 25.8 | 25.6 | 23.7 | 25.5 | 27.0 | 26.9 | 25.0 | 26.6 | 26.8 | 26.1 | 25.7 | 25.7 | 27.1 | 30.1 | 27.0 | 30.2 | 26.8 | 27.6 | 25.7 | 27.4 | 0.0 | -1.6 | 3.1E-03 |
| LZIC     | 24.6 | NaN  | 25.6 | 23.9 | NaN  | 24.3 | 24.3 | 24.5 | 24.8 | 25.6 | 25.4 | 24.1 | 25.8 | 24.6 | 26.0 | 26.9 | 26.5 | 26.0 | 25.7 | 26.9 | 24.6 | 26.3 | 0.0 | -1.6 | 3.1E-03 |
| GIT2     | 24.8 | NaN  | 23.9 | 23.1 | 24.3 | NaN  | 23.4 | NaN  | 24.1 | 22.5 | 23.4 | 23.0 | 24.6 | 23.6 | 24.8 | 26.8 | 25.3 | 25.0 | 25.2 | 25.9 | 23.6 | 25.2 | 0.0 | -1.6 | 3.2E-03 |
| DYNC1LI2 | 27.0 | 27.9 | 26.4 | 26.2 | 26.5 | 27.0 | 26.5 | 26.7 | 27.0 | 27.8 | 27.2 | 27.3 | 27.3 | 27.0 | 27.5 | 28.8 | 28.6 | 28.7 | 28.1 | 28.7 | 27.0 | 28.6 | 0.0 | -1.6 | 3.2E-03 |
| IMPAD1   | 24.1 | 24.5 | 23.4 | 24.5 | 25.2 | 25.3 | 24.7 | 24.2 | 24.7 | 24.9 | 24.3 | 25.1 | 25.2 | 24.5 | 25.4 | 26.6 | 26.2 | 26.3 | 25.7 | 27.1 | 24.6 | 26.2 | 0.0 | -1.6 | 3.3E-03 |
| MAP1B    | 30.8 | 31.2 | 31.2 | 31.3 | 30.8 | 30.8 | 31.2 | 31.3 | 31.2 | 31.5 | 31.9 | 31.1 | 31.8 | 31.8 | 32.5 | 34.0 | 32.8 | 33.3 | 32.8 | 32.9 | 31.2 | 32.9 | 0.0 | -1.6 | 3.3E-03 |
| PLOD1    | 27.7 | 27.8 | 27.4 | 27.6 | 27.7 | 27.4 | 27.7 | 27.9 | 27.8 | 27.8 | 27.9 | 28.3 | 28.2 | 27.9 | 28.2 | 29.6 | 30.2 | 29.3 | 29.0 | 30.9 | 27.8 | 29.4 | 0.0 | -1.6 | 3.7E-03 |
| SEL1L    | 25.1 | 24.7 | 25.0 | 26.2 | 25.1 | 24.7 | 25.2 | 24.7 | 25.5 | 26.0 | 25.4 | 25.8 | 25.4 | 25.4 | 24.9 | 27.8 | 26.7 | 26.9 | 26.8 | 27.3 | 25.3 | 26.9 | 0.0 | -1.6 | 3.8E-03 |
| MYO9B    | 24.9 | 26.0 | 24.9 | 24.3 | 25.3 | 25.0 | 24.6 | 25.2 | 24.6 | 26.0 | 26.5 | 25.9 | 26.2 | 25.2 | 25.8 | 28.3 | 26.7 | 26.9 | 26.9 | 26.8 | 25.2 | 26.8 | 0.0 | -1.6 | 3.8E-03 |
| TYMS     | 24.8 | 26.9 | 26.5 | 26.0 | 27.4 | 25.6 | 25.3 | 26.4 | 26.6 | 26.7 | 27.0 | 26.5 | 26.6 | 26.4 | 27.9 | 27.9 | 28.3 | 28.9 | 28.5 | 26.7 | 26.5 | 28.1 | 0.0 | -1.6 | 3.8E-03 |
| GYG1     | 24.9 | 22.4 | 24.9 | 25.5 | 24.2 | 24.5 | 24.2 | 24.6 | 24.1 | 24.7 | 24.8 | 25.1 | 25.8 | 25.2 | 26.0 | 27.0 | 26.5 | 29.1 | 26.2 | 25.8 | 24.8 | 26.4 | 0.0 | -1.6 | 3.9E-03 |
| FOXK1    | 24.3 | 23.8 | 23.7 | 23.5 | 24.6 | 24.2 | 22.9 | NaN  | 24.3 | 24.2 | 24.4 | 23.0 | 23.5 | 25.1 | 25.0 | 25.8 | 26.2 | 24.3 | 25.8 | 25.9 | 24.2 | 25.8 | 0.0 | -1.6 | 3.9E-03 |
| CORO7    | 25.8 | 26.6 | 26.4 | 25.7 | 25.2 | 25.4 | 26.0 | 25.7 | 26.7 | 26.2 | 26.3 | 25.5 | 27.1 | 25.9 | 26.4 | 28.5 | 27.4 | 27.6 | 27.0 | 27.9 | 25.9 | 27.5 | 0.0 | -1.6 | 4.0E-03 |
| DCTN3    | 25.3 | 25.9 | 26.3 | 25.0 | 25.2 | 24.2 | 25.4 | 25.3 | 25.1 | 25.9 | 25.7 | 25.9 | 25.8 | 25.6 | 26.4 | 27.7 | 27.0 | 27.2 | 26.5 | 27.2 | 25.5 | 27.1 | 0.0 | -1.6 | 4.0E-03 |

|          |      |      |      |      |      |      |      |      |      |      |      |      |      |      |      |      |      |      |      |      |      |      |      |         |         |
|----------|------|------|------|------|------|------|------|------|------|------|------|------|------|------|------|------|------|------|------|------|------|------|------|---------|---------|
| RPS4Y1   | 22.6 | 28.2 | 26.6 | 27.1 | 26.7 | 26.4 | NaN  | 21.6 | 26.5 | 22.8 | 22.6 | 28.3 | 27.8 | 26.7 | 26.9 | 28.0 | 28.9 | 27.6 | 28.8 | 28.3 | 26.6 | 28.2 | 0.0  | -1.6    | 4.2E-03 |
| GNS      | 26.7 | 27.0 | 26.4 | 26.5 | 26.5 | 26.4 | 26.2 | 26.6 | 26.9 | 27.0 | 26.7 | 27.1 | 26.9 | 27.1 | 27.6 | 29.6 | 28.2 | 28.5 | 27.7 | 29.7 | 26.7 | 28.3 | 0.0  | -1.6    | 4.4E-03 |
| MTR      | 24.8 | 27.1 | 26.6 | 25.8 | 24.7 | 25.8 | 25.6 | 26.3 | 25.6 | 26.5 | 26.4 | 25.7 | 27.1 | 25.8 | 27.1 | 27.3 | 27.5 | 26.9 | 27.5 | 29.0 | 25.8 | 27.4 | 0.0  | -1.6    | 4.5E-03 |
| ARSB     | 24.4 | 24.2 | 23.9 | 24.3 | 23.3 | 23.9 | 24.0 | NaN  | 23.7 | 23.8 | 23.9 | 24.7 | 23.9 | 23.8 | 25.0 | 25.6 | 24.8 | 25.9 | 25.3 | 26.4 | 23.9 | 25.5 | 0.0  | -1.6    | 4.5E-03 |
| CDK5RAP3 | 24.4 | 24.6 | 25.3 | 24.9 | 23.8 | 23.5 | 25.3 | 25.5 | 24.1 | 25.1 | 25.6 | 24.7 | 25.6 | 24.0 | 25.8 | 26.5 | 26.5 | 26.6 | 26.0 | 26.2 | 24.8 | 26.3 | 0.0  | -1.6    | 4.8E-03 |
| PLEC     | 30.3 | 30.9 | 30.0 | 30.8 | 30.6 | 30.9 | 30.6 | 30.6 | 30.4 | 30.3 | 30.3 | 30.4 | 30.4 | 30.4 | 30.1 | 32.7 | 31.7 | 32.2 | 31.3 | 32.4 | 30.4 | 32.0 | 0.0  | -1.5    | 4.9E-03 |
| DBNL     | 27.4 | 27.3 | 27.6 | 26.9 | 27.2 | 27.3 | 27.3 | 27.3 | 27.3 | 28.3 | 28.0 | 27.3 | 27.5 | 27.8 | 28.4 | 29.6 | 28.9 | 28.9 | 28.5 | 29.2 | 27.3 | 28.9 | 0.0  | -1.5    | 5.2E-03 |
| NHLRC2   | 26.3 | 26.3 | 26.4 | 25.6 | 26.0 | 25.3 | 26.3 | 26.6 | 26.1 | 26.3 | 26.5 | 25.6 | 27.3 | 25.2 | 27.5 | 28.2 | 28.0 | 27.8 | 27.9 | 27.4 | 26.3 | 27.8 | 0.0  | -1.5    | 5.3E-03 |
| ARPC5    | 27.7 | 27.9 | 27.6 | 28.2 | 27.4 | 27.3 | 27.9 | 27.8 | 27.6 | 27.9 | 27.8 | 28.0 | 27.8 | 27.8 | 28.2 | 29.3 | 29.0 | 29.3 | 29.3 | 29.5 | 27.8 | 29.3 | 0.0  | -1.5    | 6.0E-03 |
| COMMD9   | 24.3 | 24.8 | 26.4 | 25.7 | 25.4 | 25.1 | 24.9 | 24.7 | 25.0 | 25.8 | 24.7 | 26.0 | 24.1 | 24.5 | 26.3 | 26.7 | 26.2 | 26.6 | 26.6 | 26.3 | 24.9 | 26.4 | 0.0  | -1.5    | 6.3E-03 |
| PLOD3    | 27.1 | 27.1 | 26.7 | 26.7 | 27.4 | 27.4 | 26.4 | 27.0 | 27.3 | 27.1 | 27.0 | 27.2 | 27.6 | 27.4 | 27.4 | 28.7 | 29.0 | 28.5 | 27.9 | 29.2 | 27.1 | 28.6 | 0.0  | -1.5    | 6.5E-03 |
| SLK      | 25.8 | 25.8 | 26.1 | 26.0 | 25.9 | 25.5 | 25.5 | 26.9 | 26.1 | 25.9 | 26.1 | 26.1 | 26.3 | 25.5 | 27.4 | 27.4 | 27.4 | 27.5 | 28.8 | 27.4 | 26.0 | 27.4 | 0.0  | -1.5    | 6.6E-03 |
| AK3      | 26.3 | 25.9 | 25.4 | 25.3 | 24.5 | 21.5 | 26.4 | 25.2 | 25.7 | 25.9 | 25.7 | 26.1 | 26.2 | 26.4 | 27.3 | 27.1 | 26.2 | 27.4 | 27.2 | 28.5 | 25.8 | 27.3 | 0.0  | -1.5    | 6.6E-03 |
| PEF1     | 24.6 | 24.8 | 26.2 | 25.5 | 25.8 | 24.5 | 24.9 | 24.9 | 25.4 | 24.8 | 25.5 | 24.8 | 25.5 | 24.6 | 25.9 | 26.6 | 26.6 | 26.0 | 26.4 | 26.3 | 24.9 | 26.4 | 0.0  | -1.5    | 7.2E-03 |
| TMEM2    | 25.0 | 25.5 | 24.6 | 25.8 | 25.5 | 25.1 | 25.3 | 25.2 | 25.1 | 25.3 | 26.3 | 25.2 | 25.5 | 25.9 | 26.1 | 26.7 | 26.5 | 27.8 | 27.0 | 26.8 | 25.3 | 26.8 | 0.0  | -1.5    | 7.3E-03 |
| GNAS     | 27.4 | 27.8 | 27.8 | 28.3 | 27.8 | 28.0 | 27.7 | 27.6 | 27.5 | 27.6 | 28.1 | 28.0 | 27.9 | 27.9 | 28.3 | 29.6 | 28.6 | 29.5 | 29.1 | 29.4 | 27.8 | 29.3 | 0.0  | -1.5    | 7.5E-03 |
| LIMS1    | 25.8 | 25.2 | 25.8 | 26.2 | 25.0 | 24.3 | 25.9 | 25.7 | 24.4 | 26.1 | 25.8 | 25.8 | 25.3 | 25.9 | 27.4 | 27.5 | 27.5 | 27.0 | 26.8 | 25.8 | 27.2 | 0.0  | -1.5 | 7.6E-03 |         |
| P4HA1    | 28.1 | 28.1 | 26.7 | 28.1 | 27.2 | 27.2 | 27.3 | 27.4 | 27.4 | 27.5 | 27.4 | 27.8 | 28.4 | 28.4 | 28.1 | 29.1 | 29.7 | 28.4 | 28.7 | 30.3 | 27.5 | 28.9 | 0.0  | -1.5    | 7.6E-03 |
| BIN1     | 25.1 | 25.8 | 26.6 | 25.1 | NaN  | NaN  | 24.6 | 24.7 | 25.9 | 26.0 | 26.1 | 26.3 | 25.5 | 24.9 | 26.8 | 26.7 | 26.8 | 27.4 | 27.4 | 28.2 | 25.7 | 27.1 | 0.0  | -1.5    | 7.6E-03 |
| CHMP3    | 23.4 | 23.5 | 23.6 | 23.4 | 24.0 | 23.3 | 23.0 | 23.4 | NaN  | 23.9 | 23.9 | 24.0 | 23.1 | 23.3 | 24.3 | 25.6 | 24.7 | 24.9 | 25.0 | 24.9 | 23.4 | 24.9 | 0.0  | -1.5    | 7.7E-03 |
| SUCLG2   | 26.1 | 26.4 | 25.8 | 26.5 | 25.4 | 25.2 | 25.7 | 25.5 | 25.9 | 25.9 | 26.0 | 26.8 | 26.5 | 26.2 | 26.5 | 27.3 | 27.6 | 26.9 | 27.4 | 27.8 | 25.9 | 27.4 | 0.0  | -1.5    | 7.8E-03 |
| CTSB     | 25.6 | 24.4 | 24.1 | 24.6 | 24.5 | 26.0 | 25.8 | 25.6 | 25.1 | 26.1 | 25.8 | 25.9 | 26.1 | 25.6 | 26.5 | 28.3 | 27.3 | 26.0 | 26.7 | 28.8 | 25.6 | 27.0 | 0.0  | -1.4    | 8.0E-03 |
| COLGALT1 | 27.4 | 27.5 | 27.1 | 27.1 | 27.8 | 27.8 | 27.0 | 27.7 | 27.4 | 27.4 | 27.6 | 27.8 | 28.2 | 27.5 | 28.2 | 29.2 | 29.2 | 28.7 | 28.6 | 30.0 | 27.5 | 28.9 | 0.0  | -1.4    | 8.3E-03 |
| ANP32B   | 28.4 | 29.0 | 29.2 | 29.4 | 28.0 | 28.0 | 29.4 | 28.4 | 28.3 | 29.3 | 29.1 | 29.5 | 29.7 | 29.3 | 30.6 | 30.4 | 30.6 | 30.2 | 31.0 | 31.1 | 29.2 | 30.6 | 0.0  | -1.4    | 8.8E-03 |
| MARCH5   | 23.7 | 23.8 | 23.0 | 23.0 | 22.9 | 22.9 | 22.8 | 23.6 | 23.4 | 22.6 | 23.8 | 24.9 | 22.8 | 22.4 | 23.2 | 23.2 | 24.9 | 23.9 | 25.2 | 24.9 | 23.0 | 24.4 | 0.0  | -1.4    | 9.0E-03 |
| SLC35B2  | 25.4 | 25.3 | 25.3 | 26.2 | 25.1 | 25.1 | 25.4 | 24.8 | 25.1 | 25.5 | 25.5 | 25.3 | 25.5 | 25.2 | 25.8 | 26.8 | 26.9 | 26.8 | 26.4 | 26.7 | 25.3 | 26.7 | 0.0  | -1.4    | 9.4E-03 |
| UAP1     | 25.3 | 25.0 | 25.2 | 24.3 | 25.2 | 25.0 | 25.1 | 25.3 | 25.2 | 24.5 | 25.3 | 25.4 | 25.7 | 25.4 | 25.1 | 26.7 | 27.1 | 27.1 | 26.5 | 26.2 | 25.2 | 26.6 | 0.0  | -1.4    | 9.5E-03 |
| GNAI1    | 24.0 | 24.8 | 24.2 | 23.8 | 23.5 | NaN  | 23.4 | 24.9 | 23.2 | 24.4 | 24.1 | 24.3 | 25.1 | 24.6 | 25.3 | 24.7 | 24.7 | 25.9 | 26.6 | 26.8 | 24.2 | 25.6 | 0.0  | -1.4    | 9.6E-03 |
| FKBP10   | 28.8 | 28.6 | 28.8 | 29.4 | 29.2 | 28.8 | 28.6 | 28.4 | 28.7 | 29.0 | 28.6 | 29.2 | 28.6 | 28.6 | 29.3 | 30.4 | 30.5 | 30.0 | 29.4 | 31.6 | 28.8 | 30.2 | 0.0  | -1.4    | 9.7E-03 |
| ARHGDIA  | 30.5 | 30.3 | 30.4 | 30.4 | 30.3 | 30.1 | 30.5 | 30.4 | 30.3 | 30.6 | 30.6 | 30.3 | 30.6 | 30.7 | 31.0 | 32.4 | 31.8 | 31.9 | 31.8 | 32.0 | 30.4 | 31.8 | 0.0  | -1.4    | 9.7E-03 |
| LARP7    | 25.1 | 25.8 | 24.6 | 25.1 | 25.5 | 25.6 | 26.1 | 25.5 | 24.5 | 26.7 | 25.6 | 25.2 | 25.4 | 24.9 | 26.1 | 26.5 | 27.2 | 25.8 | 27.3 | 27.4 | 25.4 | 26.8 | 0.0  | -1.4    | 9.7E-03 |
| RER1     | 24.7 | 24.9 | 25.5 | 25.4 | 24.9 | 24.2 | 24.5 | 24.9 | 24.1 | 24.3 | 25.2 | 25.1 | 25.9 | 24.8 | 24.5 | 26.5 | 26.2 | 26.6 | 26.0 | 26.3 | 24.9 | 26.3 | 0.0  | -1.4    | 1.0E-02 |
| QIL1     | 25.2 | 25.5 | 25.1 | 26.2 | 25.9 | 24.6 | 25.2 | 24.8 | 25.8 | 25.9 | 25.1 | 26.1 | 25.4 | 25.5 | 26.0 | 26.9 | 26.6 | 26.9 | 26.9 | 26.8 | 25.4 | 26.8 | 0.0  | -1.4    | 1.0E-02 |
| INPPL1   | 24.7 | 25.1 | 25.7 | 25.3 | 24.2 | 25.9 | 25.4 | 25.0 | 25.3 | 26.0 | 26.2 | 24.3 | 25.9 | 25.0 | 26.1 | 27.2 | 26.8 | 27.2 | 25.6 | 26.5 | 25.3 | 26.7 | 0.0  | -1.4    | 1.0E-02 |
| ECHDC1   | 27.1 | 26.0 | 26.2 | 25.4 | 24.4 | 26.5 | 25.3 | 23.8 | 25.7 | 26.6 | 25.8 | 26.0 | 26.6 | 26.6 | 26.4 | 27.2 | 27.5 | 27.2 | 27.5 | 27.8 | 26.0 | 27.4 | 0.0  | -1.4    | 1.1E-02 |
| PPP4R1   | 25.5 | 26.0 | 25.7 | 26.3 | 26.0 | 26.0 | 25.2 | 26.0 | 25.7 | 25.8 | 25.7 | 25.8 | 25.6 | 25.7 | 26.5 | 27.1 | 26.3 | 28.0 | 27.4 | 27.2 | 25.8 | 27.1 | 0.0  | -1.4    | 1.1E-02 |
| ERGIC3   | 24.0 | NaN  | 23.6 | 24.9 | 24.1 | 22.8 | 24.1 | 23.5 | 23.8 | 24.0 | 24.1 | 24.4 | 24.4 | 23.7 | 24.7 | 25.2 | 25.4 | 25.5 | 25.4 | 25.8 | 24.0 | 25.4 | 0.0  | -1.4    | 1.1E-02 |
| ADAM9    | NaN  | NaN  | 23.0 | 23.1 | NaN  | NaN  | 22.8 | NaN  | 23.4 | 24.1 | 22.6 | 23.3 | 21.9 | NaN  | 23.6 | 26.7 | 23.4 | 27.1 | 25.1 | 23.7 | 23.0 | 24.4 | 0.0  | -1.4    | 1.1E-02 |
| GLIPR2   | 24.2 | NaN  | 23.7 | NaN  | 24.5 | 24.7 | 24.2 | NaN  | 24.2 | 24.5 | 24.6 | NaN  | 24.7 | 23.6 | 24.0 | 27.5 | 25.3 | 26.2 | 25.6 | 25.8 | 24.4 | 25.7 | 0.0  | -1.4    | 1.1E-02 |
| CCDC22   | NaN  | NaN  | 23.1 | 23.0 | 22.2 | NaN  | NaN  | NaN  | 22.8 | 23.2 | 23.1 | 22.7 | NaN  | NaN  | 23.8 | 24.8 | 24.0 | 25.8 | 25.3 | 23.8 | 23.0 | 24.4 | 0.0  | -1.4    | 1.1E-02 |
| FAM213A  | 27.6 | 28.1 | 28.1 | 28.3 | 27.9 | 28.0 | 27.3 | 27.6 | 27.9 | 28.4 | 28.3 | 27.9 | 28.2 | 27.8 | 28.4 | 29.5 | 28.9 | 29.3 | 29.3 | 29.7 | 27.9 | 29.3 | 0.0  | -1.4    | 1.1E-02 |
| CLCN3    | 22.4 | 21.8 | 21.9 | 22.1 | 21.5 | 21.7 | 22.4 | 22.8 | 21.7 | 21.8 | 22.1 | 22.0 | 22.6 | 22.7 | 21.8 | 24.3 | 23.4 | 23.4 | 22.3 | 24.5 | 22.0 | 23.4 | 0.0  | -1.4    | 1.2E-02 |

|          |      |      |      |      |      |      |      |      |      |      |      |      |      |      |      |      |      |      |      |      |      |      |     |      |         |
|----------|------|------|------|------|------|------|------|------|------|------|------|------|------|------|------|------|------|------|------|------|------|------|-----|------|---------|
| CHMP6    | 24.8 | 25.5 | 25.1 | 24.9 | 24.8 | 24.5 | 24.5 | 24.2 | 24.5 | 25.3 | 25.1 | 25.1 | 24.8 | 24.3 | 25.1 | 27.1 | 25.8 | 26.2 | 26.1 | 26.3 | 24.8 | 26.1 | 0.0 | -1.4 | 1.2E-02 |
| RAP1GDS1 | 27.6 | 28.2 | 28.4 | 27.0 | 27.7 | 27.7 | 27.3 | 27.8 | 27.4 | 28.3 | 28.0 | 27.6 | 28.2 | 28.0 | 28.5 | 29.8 | 29.2 | 29.0 | 29.0 | 30.6 | 27.8 | 29.1 | 0.0 | -1.3 | 1.2E-02 |
| MKL2     | 23.6 | NaN  | 23.3 | 23.1 | 23.7 | NaN  | NaN  | NaN  | 23.5 | 23.3 | 24.6 | NaN  | 23.4 | NaN  | 24.0 | 26.0 | 25.6 | 24.3 | 23.5 | 25.2 | 23.4 | 24.8 | 0.0 | -1.3 | 1.2E-02 |
| LIMD2    | 24.7 | 24.8 | 23.8 | 23.2 | 24.7 | 25.3 | 25.4 | NaN  | 24.7 | 26.3 | 25.2 | 23.2 | 24.1 | 24.5 | 26.0 | 26.5 | 26.8 | 24.9 | 26.0 | 25.6 | 24.7 | 26.0 | 0.0 | -1.3 | 1.3E-02 |
| B3GAT3   | 25.0 | 23.9 | 24.2 | NaN  | 24.1 | NaN  | 24.5 | 24.0 | 24.5 | 24.3 | 24.8 | 24.1 | 24.9 | 24.8 | 25.2 | 26.3 | 25.4 | 26.0 | 25.1 | 26.1 | 24.4 | 25.7 | 0.0 | -1.3 | 1.3E-02 |
| STAM2    | 23.5 | 23.6 | 25.0 | NaN  | 24.1 | NaN  | 23.5 | NaN  | 23.3 | 24.0 | 23.2 | NaN  | 23.2 | 23.7 | 24.1 | 25.7 | 25.2 | NaN  | NaN  | 24.6 | 23.5 | 24.9 | 0.0 | -1.3 | 1.3E-02 |
| NAGK     | 26.1 | 26.8 | 27.0 | 27.6 | 27.0 | 26.4 | 26.9 | 26.8 | 26.3 | 27.0 | 26.8 | 26.5 | 26.8 | 26.8 | 27.2 | 29.1 | 27.8 | 28.5 | 27.5 | 28.4 | 26.8 | 28.1 | 0.0 | -1.3 | 1.3E-02 |
| PRKAA1   | 25.8 | 25.1 | 25.0 | 25.6 | 25.8 | 25.4 | 25.7 | 25.4 | 25.2 | 25.9 | 25.8 | 25.1 | 25.6 | 25.9 | 26.4 | 26.9 | 27.0 | 26.9 | 26.7 | 27.6 | 25.6 | 26.9 | 0.0 | -1.3 | 1.4E-02 |
| GUK1     | 23.9 | 23.9 | 23.8 | 24.3 | 23.4 | NaN  | 23.9 | 24.8 | NaN  | 23.8 | 23.3 | 25.0 | 24.1 | 24.0 | 24.0 | 25.8 | 24.8 | 26.2 | 24.6 | 25.6 | 23.9 | 25.2 | 0.0 | -1.3 | 1.4E-02 |
| AIP      | 25.2 | 26.1 | 25.7 | 26.2 | 25.5 | 26.1 | 25.8 | 26.4 | 25.6 | 25.5 | 25.6 | 25.8 | 25.8 | 25.4 | 26.8 | 26.9 | 27.5 | 27.0 | 27.6 | 27.2 | 25.8 | 27.1 | 0.0 | -1.3 | 1.4E-02 |
| USP47    | 26.5 | 26.4 | 26.6 | 26.9 | 27.2 | 27.6 | 26.4 | 26.3 | 27.4 | 26.6 | 26.7 | 26.0 | 27.0 | 26.9 | 27.0 | 28.6 | 27.9 | 28.3 | 28.0 | 27.7 | 26.7 | 28.0 | 0.0 | -1.3 | 1.5E-02 |
| IDI1     | 28.1 | 28.1 | 29.5 | 29.0 | 27.7 | 27.5 | 27.9 | 28.2 | 28.0 | 28.7 | 28.7 | 28.6 | 28.3 | 28.4 | 28.9 | 29.5 | 29.6 | 30.8 | 30.3 | 29.1 | 28.2 | 29.5 | 0.0 | -1.3 | 1.5E-02 |
| LSS      | 28.8 | 28.8 | 28.9 | 29.1 | 28.3 | 28.4 | 28.4 | 28.4 | 28.3 | 28.8 | 28.9 | 29.1 | 28.4 | 28.5 | 29.0 | 30.4 | 29.7 | 30.4 | 30.2 | 29.4 | 28.6 | 29.9 | 0.0 | -1.3 | 1.5E-02 |
| CMPK1    | 27.1 | 27.5 | 27.1 | 26.6 | 27.0 | 27.1 | 27.3 | 27.5 | 27.3 | 27.5 | 27.5 | 27.3 | 27.9 | 27.5 | 28.0 | 29.1 | 29.0 | 28.3 | 28.4 | 28.8 | 27.3 | 28.6 | 0.0 | -1.3 | 1.5E-02 |
| PRKACA   | 26.6 | 26.1 | 26.6 | 26.2 | 26.5 | 26.0 | 26.4 | 26.9 | 26.1 | 26.3 | 26.9 | 26.8 | 27.1 | 27.0 | 27.0 | 28.2 | 28.0 | 27.7 | 27.2 | 27.9 | 26.5 | 27.8 | 0.0 | -1.3 | 1.5E-02 |
| GSN      | 29.1 | 29.0 | 29.9 | 28.3 | 29.1 | 29.2 | 29.1 | 28.7 | 29.3 | 29.0 | 29.3 | 28.5 | 29.9 | 29.0 | 29.6 | 32.3 | 31.4 | 29.4 | 29.4 | 31.1 | 29.1 | 30.4 | 0.0 | -1.3 | 1.5E-02 |
| RNH1     | 29.1 | 29.4 | 29.5 | 28.8 | 28.6 | 28.2 | 29.0 | 29.7 | 29.1 | 29.3 | 29.1 | 29.6 | 29.1 | 29.8 | 29.8 | 31.1 | 30.2 | 30.2 | 30.7 | 31.6 | 29.1 | 30.4 | 0.0 | -1.3 | 1.5E-02 |
| FTH1     | 29.5 | 29.7 | 30.8 | 28.2 | 28.6 | 29.3 | 28.9 | 29.5 | 28.0 | 28.9 | 29.4 | 28.4 | 30.2 | 29.8 | 29.9 | 30.7 | 31.2 | 30.1 | 30.5 | 30.8 | 29.3 | 30.6 | 0.0 | -1.3 | 1.5E-02 |
| MON2     | 24.1 | 24.8 | 24.7 | 23.7 | NaN  | 22.7 | 24.5 | 24.2 | 23.2 | 24.5 | 24.4 | 25.0 | 25.5 | 24.2 | 24.4 | 25.5 | 25.7 | 25.8 | 26.2 | 25.8 | 24.4 | 25.7 | 0.0 | -1.3 | 1.6E-02 |
| RAC3     | 23.4 | 24.9 | 22.5 | 23.0 | 23.0 | 23.3 | 23.3 | 24.5 | 23.2 | 23.0 | 23.6 | 24.3 | 24.6 | 23.3 | 23.4 | 25.4 | 25.4 | 24.1 | 25.1 | 23.8 | 23.3 | 24.6 | 0.0 | -1.3 | 1.6E-02 |
| KIF5B    | 29.5 | 29.8 | 29.5 | 29.5 | 29.3 | 29.1 | 29.5 | 29.6 | 29.6 | 29.7 | 29.8 | 29.7 | 30.0 | 29.8 | 30.2 | 31.1 | 31.0 | 31.0 | 30.7 | 30.8 | 29.6 | 30.9 | 0.0 | -1.3 | 1.6E-02 |
| PPP1R18  | 23.2 | NaN  | 21.7 | 23.5 | 22.4 | NaN  | 22.8 | 23.1 | 22.3 | 23.1 | 23.2 | 21.8 | 22.5 | 23.0 | 23.0 | 25.7 | 25.1 | 23.1 | 24.4 | 24.0 | 22.9 | 24.2 | 0.0 | -1.3 | 1.6E-02 |
| OVCA2    | 23.6 | 23.7 | 25.9 | 25.5 | 23.7 | 24.4 | 24.0 | 23.7 | 23.2 | 24.1 | 24.4 | 24.2 | 25.2 | 25.0 | 23.9 | 25.3 | 25.3 | 27.1 | 25.6 | 25.5 | 24.2 | 25.4 | 0.0 | -1.3 | 1.7E-02 |
| CKAP4    | 30.5 | 30.7 | 30.5 | 30.9 | 30.7 | 30.5 | 30.3 | 30.4 | 30.7 | 30.7 | 30.8 | 30.9 | 30.9 | 30.8 | 31.2 | 32.2 | 32.4 | 31.7 | 31.5 | 32.8 | 30.7 | 32.0 | 0.0 | -1.3 | 1.7E-02 |
| DIP2B    | 24.1 | 24.8 | 24.4 | 24.3 | 23.6 | 22.9 | 24.1 | 24.0 | 24.5 | 25.1 | 24.6 | 24.8 | 24.7 | 24.3 | 25.0 | 26.2 | 25.7 | 24.6 | 25.5 | 25.9 | 24.4 | 25.6 | 0.0 | -1.3 | 1.7E-02 |
| ATP2B4   | 23.9 | 23.9 | 23.0 | 22.4 | NaN  | 23.0 | 24.9 | 23.7 | 23.3 | 24.0 | 25.4 | 24.1 | 23.3 | 23.8 | 24.5 | 27.3 | 24.3 | 25.7 | 23.7 | 27.1 | 23.8 | 25.1 | 0.0 | -1.3 | 1.7E-02 |
| RBBP9    | 23.6 | 24.6 | NaN  | NaN  | 23.9 | NaN  | 24.0 | NaN  | 24.0 | 23.9 | 24.1 | 24.6 | 24.7 | 24.2 | 24.8 | 26.8 | 25.7 | 24.6 | 25.0 | 25.6 | 24.0 | 25.3 | 0.0 | -1.3 | 1.7E-02 |
| GBAS     | 26.5 | 24.6 | 26.0 | 26.6 | 27.1 | 27.1 | 26.2 | 25.9 | 25.7 | 26.3 | 26.6 | 25.8 | 27.0 | 26.4 | 27.0 | 28.6 | 27.7 | 27.5 | 27.6 | 27.9 | 26.4 | 27.6 | 0.0 | -1.3 | 1.7E-02 |
| NAGA     | 24.7 | NaN  | 24.5 | 23.6 | NaN  | NaN  | 24.7 | 22.3 | 24.9 | 24.5 | 24.5 | 25.8 | 25.9 | 25.5 | 24.8 | 27.8 | 25.9 | 25.0 | 26.0 | 26.7 | 24.7 | 26.0 | 0.0 | -1.3 | 1.8E-02 |
| NIT2     | 26.5 | 26.3 | 26.0 | 26.0 | 26.7 | 26.3 | 26.9 | 26.1 | 25.5 | 26.0 | 25.7 | 26.1 | 26.7 | 26.4 | 27.0 | 27.0 | 27.9 | 26.3 | 28.0 | 28.9 | 26.2 | 27.5 | 0.0 | -1.3 | 1.8E-02 |
| YIPF5    | 23.7 | 23.3 | 22.9 | 23.6 | 24.3 | 24.6 | 23.7 | 23.1 | 23.5 | 23.8 | 24.0 | 23.1 | 23.6 | 24.0 | NaN  | 25.0 | 25.0 | 24.2 | 24.1 | 24.9 | 23.7 | 24.9 | 0.0 | -1.2 | 1.8E-02 |
| HEBP2    | 24.1 | 23.9 | 24.6 | 25.2 | 25.7 | NaN  | 24.7 | 24.4 | NaN  | 24.6 | 24.5 | 24.3 | 24.9 | 24.8 | 25.5 | 24.6 | 24.8 | 26.7 | 26.3 | 26.2 | 24.6 | 25.8 | 0.0 | -1.2 | 1.9E-02 |
| MAPKAPK2 | 22.9 | 22.9 | 22.7 | 23.2 | 22.1 | NaN  | 23.0 | NaN  | 23.1 | 22.3 | 22.8 | NaN  | 23.0 | 23.1 | 22.8 | 24.3 | 24.3 | 23.9 | 22.9 | 24.4 | 22.9 | 24.1 | 0.0 | -1.2 | 1.9E-02 |
| TUBA1A   | 31.2 | 31.0 | 30.5 | 30.0 | 30.2 | 30.5 | 31.0 | 30.8 | 31.0 | 31.2 | 31.7 | 30.9 | 31.6 | 31.3 | 32.1 | 33.7 | 32.3 | 32.1 | 31.7 | 32.3 | 31.0 | 32.2 | 0.0 | -1.2 | 1.9E-02 |
| PEG10    | 26.1 | 25.4 | 26.4 | 26.2 | 26.0 | 25.7 | 26.3 | 25.3 | 25.7 | 26.2 | 25.8 | 26.2 | 26.0 | 25.4 | 26.9 | 27.8 | 27.3 | 28.1 | 27.1 | 26.0 | 26.0 | 27.2 | 0.0 | -1.2 | 1.9E-02 |
| ANTXR1   | 24.0 | 23.4 | 23.4 | 24.2 | 23.9 | 23.1 | 23.5 | 23.2 | 23.6 | 24.2 | 23.9 | 23.5 | 23.5 | 24.2 | 24.4 | 25.7 | 24.8 | 24.5 | 24.8 | 25.3 | 23.6 | 24.8 | 0.0 | -1.2 | 2.0E-02 |
| DPYSL4   | 26.0 | 27.8 | 26.4 | 23.7 | 26.1 | 26.2 | 26.4 | 26.2 | 26.2 | 27.5 | 28.0 | 26.4 | 27.0 | 27.0 | 28.1 | 30.1 | 26.7 | 29.0 | 27.1 | 27.1 | 26.4 | 27.6 | 0.0 | -1.2 | 2.0E-02 |
| DCTN6    | 23.6 | 24.9 | 24.0 | 24.6 | 23.6 | 23.8 | 24.1 | 25.5 | 24.0 | 24.7 | 24.0 | 24.4 | 24.1 | 23.5 | 24.7 | 25.6 | 25.2 | 25.8 | 25.3 | 25.3 | 24.1 | 25.3 | 0.0 | -1.2 | 2.0E-02 |
| TMEM109  | 25.5 | 25.9 | 25.9 | 26.5 | 26.8 | 26.8 | 25.5 | 25.7 | 25.4 | 26.4 | 26.1 | 26.1 | 26.0 | 26.1 | 26.8 | 27.3 | 27.8 | 27.8 | 27.2 | 27.1 | 26.0 | 27.3 | 0.0 | -1.2 | 2.0E-02 |
| DTX3     | 23.6 | NaN  | 24.2 | 24.3 | 23.8 | NaN  | 23.7 | 23.9 | 23.2 | 24.0 | 23.8 | 24.5 | 23.7 | NaN  | 24.6 | 25.6 | NaN  | 25.1 | 24.9 | 25.4 | 23.8 | 25.1 | 0.0 | -1.2 | 2.0E-02 |
| MAP1LC3B | 27.2 | 27.5 | 27.2 | 27.0 | 27.1 | 27.5 | 27.6 | 27.6 | 27.1 | 27.5 | 27.8 | 27.7 | 28.0 | 27.9 | 27.7 | 29.0 | 28.9 | 29.0 | 28.5 | 28.3 | 27.5 | 28.7 | 0.0 | -1.2 | 2.0E-02 |
| ILK      | 28.0 | 28.0 | 27.6 | 28.8 | 28.0 | 28.1 | 28.0 | 28.1 | 27.8 | 28.2 | 27.9 | 27.9 | 28.0 | 28.1 | 28.2 | 29.6 | 29.6 | 29.4 | 29.1 | 28.8 | 28.0 | 29.2 | 0.0 | -1.2 | 2.0E-02 |

|         |      |      |      |      |      |      |      |      |      |      |      |      |      |      |      |      |      |      |      |      |      |      |     |      |         |
|---------|------|------|------|------|------|------|------|------|------|------|------|------|------|------|------|------|------|------|------|------|------|------|-----|------|---------|
| ELOVL1  | 25.8 | 25.1 | 25.3 | 26.3 | 20.3 | 28.1 | 25.4 | 25.3 | 25.3 | 25.6 | 25.7 | 25.9 | 25.2 | 25.2 | 25.7 | 26.1 | 26.8 | 27.1 | 26.8 | 26.4 | 25.4 | 26.6 | 0.0 | -1.2 | 2.1E-02 |
| KCTD15  | 23.4 | 24.3 | 24.5 | 24.0 | 23.2 | 23.3 | 23.3 | 24.6 | 23.6 | 23.2 | 24.3 | 24.9 | 24.6 | 23.8 | 25.3 | 25.1 | 23.7 | 24.6 | 25.6 | 25.1 | 23.9 | 25.1 | 0.0 | -1.2 | 2.1E-02 |
| TRIP13  | 26.5 | 27.7 | 27.3 | 27.4 | 25.5 | 26.5 | 26.5 | 27.1 | 25.9 | 26.8 | 26.6 | 26.7 | 27.2 | 26.7 | 27.0 | 27.2 | 28.2 | 28.1 | 28.3 | 27.8 | 26.7 | 27.9 | 0.0 | -1.2 | 2.2E-02 |
| PDPK2P  | 22.3 | NaN  | 22.2 | NaN  | 21.4 | 22.1 | 21.3 | 26.4 | 22.2 | 21.9 | 22.6 | 22.1 | 22.0 | 22.2 | 24.4 | 23.0 | 22.7 | 24.1 | NaN  | 23.3 | 22.1 | 23.3 | 0.0 | -1.2 | 2.2E-02 |
| SEC14L1 | 22.5 | 24.0 | 24.1 | 23.4 | 22.7 | NaN  | 22.2 | NaN  | 22.4 | 24.4 | 24.5 | 24.0 | 22.8 | NaN  | 24.0 | 26.1 | 24.5 | 27.1 | 23.8 | 24.8 | 23.4 | 24.6 | 0.0 | -1.2 | 2.2E-02 |
| PDYN    | 25.2 | 25.3 | 26.8 | 26.1 | NaN  | 25.2 | 25.5 | 25.0 | 25.2 | 25.6 | 26.0 | 26.0 | 26.4 | 25.6 | 26.0 | 27.0 | 26.8 | 27.3 | 26.7 | 26.6 | 25.6 | 26.8 | 0.0 | -1.2 | 2.2E-02 |
| LAMP2   | 25.6 | 25.4 | 25.6 | 25.8 | 24.0 | 23.7 | 25.8 | 26.1 | 25.2 | 25.8 | 25.4 | 25.9 | 26.0 | 25.2 | 25.8 | 27.0 | 25.3 | 27.3 | 26.5 | 27.7 | 25.6 | 26.8 | 0.0 | -1.2 | 2.2E-02 |
| SEC22B  | 27.9 | 28.3 | 27.7 | 27.6 | 28.3 | 28.2 | 27.8 | 27.9 | 28.0 | 28.1 | 28.1 | 28.1 | 27.8 | 28.1 | 28.6 | 29.5 | 29.5 | 28.9 | 28.8 | 29.8 | 28.0 | 29.2 | 0.0 | -1.2 | 2.3E-02 |
| PBX1    | 23.8 | 19.2 | NaN  | 23.6 | 23.7 | 24.2 | 23.5 | NaN  | 23.5 | 23.7 | 23.3 | NaN  | 23.2 | 23.8 | 24.5 | 24.8 | 24.8 | 24.1 | NaN  | 26.5 | 23.6 | 24.8 | 0.0 | -1.2 | 2.3E-02 |
| CRELD2  | 24.1 | 24.8 | 24.4 | 24.5 | 24.0 | 23.5 | 23.9 | 24.1 | 23.9 | 24.4 | 24.4 | 25.3 | 24.3 | 24.9 | 24.3 | 26.2 | 25.7 | 25.0 | 25.4 | 26.1 | 24.4 | 25.6 | 0.0 | -1.2 | 2.4E-02 |
| TLN1    | 31.6 | 31.9 | 31.8 | 31.9 | 32.0 | 32.1 | 31.9 | 31.9 | 31.6 | 31.9 | 31.7 | 31.3 | 30.8 | 31.9 | 32.0 | 33.4 | 33.0 | 33.6 | 32.9 | 33.1 | 31.9 | 33.1 | 0.0 | -1.2 | 2.4E-02 |
| APOL2   | 22.5 | 23.0 | 22.9 | 23.5 | 23.9 | 23.5 | 23.2 | 23.5 | 23.4 | 22.7 | 22.4 | 22.7 | 22.4 | 21.8 | 23.2 | 24.8 | 24.5 | 23.7 | 23.5 | 24.8 | 23.0 | 24.1 | 0.0 | -1.2 | 2.5E-02 |
| PSMD9   | 25.2 | 25.0 | NaN  | 25.0 | 24.8 | 24.3 | 25.9 | 25.5 | 24.8 | 25.6 | 25.6 | 24.7 | 24.2 | 24.8 | 25.4 | 26.1 | 26.0 | 26.1 | 26.6 | 26.6 | 25.0 | 26.1 | 0.0 | -1.2 | 2.5E-02 |
| FXR2    | 26.1 | 26.5 | 25.6 | 24.5 | 25.7 | 26.6 | 26.4 | 26.4 | 26.0 | 26.2 | 26.5 | 25.8 | 26.1 | 26.1 | 26.8 | 27.4 | 27.5 | 27.4 | 26.8 | 27.2 | 26.1 | 27.3 | 0.0 | -1.2 | 2.5E-02 |
| WIZ     | 26.2 | 26.0 | 26.1 | 25.7 | 26.1 | NaN  | 25.9 | 23.5 | 25.5 | 26.8 | 26.6 | 24.0 | 25.4 | 25.1 | 27.0 | 26.8 | 27.8 | 26.6 | 27.2 | 27.2 | 25.9 | 27.1 | 0.0 | -1.2 | 2.6E-02 |
| CPPED1  | 25.4 | 25.5 | 25.0 | 24.2 | 25.5 | NaN  | 25.2 | 24.0 | 25.4 | 25.6 | 24.8 | 24.9 | 22.8 | 25.5 | 25.5 | 26.0 | 26.6 | 25.3 | 27.3 | 27.5 | 25.2 | 26.3 | 0.0 | -1.2 | 2.6E-02 |
| HINT2   | 26.2 | 25.9 | 27.1 | 26.9 | 25.7 | 25.4 | 26.1 | 26.5 | 26.0 | 26.5 | 26.2 | 26.6 | 26.6 | 26.6 | 27.2 | 27.4 | 26.8 | 27.7 | 27.6 | 27.7 | 26.4 | 27.5 | 0.0 | -1.2 | 2.6E-02 |
| ITGB1   | 29.8 | 29.3 | 29.5 | 30.0 | 29.5 | 29.0 | 29.7 | 29.4 | 29.1 | 29.7 | 29.6 | 29.7 | 29.6 | 29.5 | 29.7 | 30.8 | 30.6 | 31.1 | 30.3 | 30.8 | 29.5 | 30.7 | 0.0 | -1.2 | 2.6E-02 |
| GSTO1   | 27.8 | 27.7 | 28.2 | 28.3 | 27.8 | 28.3 | 28.5 | 28.1 | 27.1 | 27.9 | 28.2 | 27.2 | 28.7 | 28.8 | 28.6 | 29.2 | 29.8 | 29.3 | 29.4 | 29.6 | 28.2 | 29.3 | 0.0 | -1.2 | 2.6E-02 |
| DECR1   | 27.6 | 27.4 | 27.6 | 28.1 | 27.4 | 27.7 | 27.7 | 27.1 | 27.3 | 27.3 | 27.5 | 27.6 | 28.1 | 28.0 | 27.9 | 29.6 | 28.5 | 28.7 | 28.7 | 28.8 | 27.6 | 28.7 | 0.0 | -1.2 | 2.6E-02 |
| DDAH2   | 27.6 | 28.0 | 27.3 | 27.0 | 27.6 | 28.0 | 27.5 | 28.2 | 27.7 | 27.8 | 28.3 | 27.4 | 28.6 | 28.4 | 29.0 | 30.5 | 28.9 | 29.4 | 28.6 | 28.1 | 27.8 | 29.0 | 0.0 | -1.2 | 2.7E-02 |
| CGGBP1  | 24.5 | 23.9 | 24.1 | 24.1 | 23.7 | 24.1 | 23.9 | 24.1 | 24.6 | 25.2 | 25.4 | 23.3 | 24.9 | 24.4 | 25.3 | 25.3 | 25.7 | 25.7 | 25.1 | 25.1 | 24.1 | 25.3 | 0.0 | -1.1 | 2.7E-02 |
| GOLIM4  | 25.5 | 25.8 | 24.9 | 26.3 | 26.4 | 26.1 | 26.1 | 25.6 | 26.2 | 25.9 | 25.8 | 26.3 | 26.2 | 25.8 | 26.7 | 27.2 | 27.8 | 26.9 | 27.1 | 27.3 | 26.0 | 27.1 | 0.0 | -1.1 | 2.7E-02 |
| BAZ1A   | 24.3 | 24.0 | 24.1 | 24.0 | 24.7 | 25.3 | 24.3 | 23.9 | 24.6 | 24.5 | 24.6 | 25.8 | 24.4 | 24.3 | 26.1 | 25.5 | 25.6 | 25.0 | 26.9 | 25.3 | 24.4 | 25.5 | 0.0 | -1.1 | 2.8E-02 |
| NEMF    | 25.4 | 25.3 | 25.0 | 25.2 | 25.1 | 25.1 | 25.3 | 26.3 | 25.5 | 25.5 | 25.4 | 25.9 | 25.9 | 25.2 | 25.6 | 26.3 | 25.7 | 26.6 | 26.8 | 26.7 | 25.3 | 26.5 | 0.0 | -1.1 | 2.8E-02 |
| FDPS    | 30.3 | 30.4 | 30.6 | 30.4 | 30.3 | 30.5 | 30.4 | 30.6 | 30.2 | 30.2 | 30.8 | 29.8 | 31.1 | 30.9 | 30.6 | 31.9 | 32.2 | 31.8 | 31.3 | 31.1 | 30.4 | 31.5 | 0.0 | -1.1 | 2.8E-02 |
| DOCK1   | 24.9 | 24.2 | 24.2 | 24.6 | 24.6 | 24.1 | 24.9 | 24.5 | 24.6 | 25.2 | 24.5 | 23.8 | 25.3 | 23.9 | 25.6 | 26.1 | 26.2 | 25.7 | 24.8 | 25.4 | 24.5 | 25.7 | 0.0 | -1.1 | 2.8E-02 |
| HECTD3  | 23.2 | NaN  | 23.3 | 23.7 | NaN  | NaN  | 23.4 | 22.9 | NaN  | 23.2 | 23.8 | 22.9 | 23.1 | 22.9 | 23.8 | 25.5 | 24.5 | 23.8 | 24.3 | 24.5 | 23.2 | 24.4 | 0.0 | -1.1 | 2.8E-02 |
| GSS     | 27.5 | 27.4 | 27.8 | 27.4 | 26.9 | 27.0 | 28.2 | 27.8 | 27.5 | 27.7 | 27.7 | 27.6 | 28.2 | 27.9 | 28.1 | 29.0 | 28.8 | 28.6 | 28.8 | 29.4 | 27.7 | 28.8 | 0.0 | -1.1 | 2.8E-02 |
| DCTN1   | 28.5 | 28.4 | 28.9 | 29.1 | 28.5 | 27.4 | 28.9 | 29.1 | 28.3 | 28.5 | 28.6 | 28.0 | 28.7 | 28.5 | 29.2 | 30.5 | 29.5 | 30.1 | 29.1 | 29.8 | 28.5 | 29.7 | 0.0 | -1.1 | 2.9E-02 |
| GDI1    | 28.8 | 29.2 | 28.9 | 28.9 | 29.1 | 29.4 | 28.9 | 29.1 | 29.0 | 29.2 | 29.3 | 29.0 | 29.5 | 29.3 | 29.7 | 31.7 | 29.9 | 30.9 | 30.0 | 30.4 | 29.1 | 30.2 | 0.0 | -1.1 | 2.9E-02 |
| SH3BGRL | 25.9 | 26.4 | 27.2 | 25.8 | 25.6 | 26.0 | 26.3 | 26.6 | 26.3 | 26.8 | 26.4 | 26.2 | 26.2 | 25.8 | 26.9 | 27.3 | 26.7 | 28.2 | 27.4 | 27.7 | 26.2 | 27.4 | 0.0 | -1.1 | 2.9E-02 |
| BCS1L   | 24.6 | 25.1 | 24.4 | 23.5 | 24.6 | NaN  | 23.7 | 23.2 | 24.1 | 25.0 | 24.4 | 25.3 | 24.4 | 23.5 | 25.6 | 25.7 | 25.4 | 24.3 | NaN  | 25.9 | 24.4 | 25.6 | 0.0 | -1.1 | 2.9E-02 |
| VAMP3   | 26.4 | 26.0 | 26.2 | 26.7 | 25.7 | 26.0 | 26.2 | 25.6 | 26.0 | 26.5 | 26.3 | 26.2 | 26.6 | 26.2 | 26.8 | 27.3 | 27.3 | 27.5 | 27.3 | 27.7 | 26.2 | 27.3 | 0.0 | -1.1 | 2.9E-02 |
| CSK     | 26.4 | 27.0 | 26.5 | 26.5 | 26.7 | 26.9 | 26.4 | 27.3 | 26.6 | 26.8 | 26.9 | 26.8 | 27.2 | 26.8 | 27.5 | 28.0 | 27.7 | 27.8 | 28.6 | 28.1 | 26.8 | 27.9 | 0.0 | -1.1 | 3.0E-02 |
| NENF    | 24.1 | 25.0 | 23.9 | 24.3 | 23.1 | 24.6 | 24.0 | 24.3 | 24.1 | 23.7 | 24.3 | 24.7 | 23.8 | 24.2 | 24.0 | 25.6 | 24.1 | 25.7 | 25.0 | 25.8 | 24.2 | 25.3 | 0.0 | -1.1 | 3.1E-02 |
| ARFGAP3 | 23.8 | 23.8 | 22.8 | NaN  | 24.2 | 24.5 | 23.6 | 24.3 | 24.0 | 23.5 | NaN  | NaN  | NaN  | 24.0 | 24.1 | 25.6 | 25.7 | 25.0 | 23.9 | 25.1 | 23.9 | 25.0 | 0.0 | -1.1 | 3.1E-02 |
| RB1     | 24.2 | 24.3 | 23.5 | 24.0 | 23.7 | 24.1 | 24.1 | 23.6 | 24.3 | 24.6 | 24.5 | 24.3 | 24.2 | 24.3 | 24.6 | 26.3 | 26.0 | 25.4 | 24.8 | 25.3 | 24.2 | 25.3 | 0.0 | -1.1 | 3.1E-02 |
| LZTFL1  | 23.7 | 24.4 | 23.7 | 24.2 | 24.0 | NaN  | 23.8 | 25.7 | NaN  | 23.7 | 23.6 | 23.8 | 24.2 | 23.7 | 24.2 | 25.7 | 24.4 | 24.6 | 25.2 | 25.7 | 23.8 | 24.9 | 0.0 | -1.1 | 3.2E-02 |
| MYDGF   | 27.6 | 27.8 | 27.2 | 27.7 | 27.6 | 27.9 | 27.5 | 27.6 | 27.6 | 27.8 | 27.5 | 27.7 | 27.8 | 27.7 | 27.9 | 28.8 | 29.0 | 28.9 | 28.5 | 28.7 | 27.6 | 28.7 | 0.0 | -1.1 | 3.2E-02 |
| SLC35E1 | 24.0 | NaN  | 24.5 | 25.2 | 23.5 | 24.2 | 23.3 | NaN  | 23.8 | 24.2 | 24.0 | 23.8 | 23.7 | NaN  | 24.4 | 24.5 | 25.4 | 25.5 | 24.7 | 25.9 | 24.0 | 25.1 | 0.0 | -1.1 | 3.2E-02 |
| GMPPB   | 26.5 | 26.8 | 27.0 | 27.3 | 26.8 | 26.9 | 27.0 | 27.2 | 26.8 | 26.9 | 26.8 | 26.8 | 27.1 | 27.0 | 27.1 | 28.0 | 28.1 | 28.3 | 28.1 | 27.9 | 26.9 | 28.0 | 0.0 | -1.1 | 3.3E-02 |

|         |      |      |      |      |      |      |      |      |      |      |      |      |      |      |      |      |      |      |      |      |      |      |     |      |         |
|---------|------|------|------|------|------|------|------|------|------|------|------|------|------|------|------|------|------|------|------|------|------|------|-----|------|---------|
| ACOX1   | 25.2 | 25.6 | 25.9 | 26.5 | 24.9 | NaN  | 25.7 | 25.6 | 25.5 | 26.0 | 25.4 | 27.0 | 25.6 | 25.2 | 26.0 | 26.9 | 26.2 | 26.5 | 27.6 | 27.3 | 25.6 | 26.7 | 0.0 | -1.1 | 3.3E-02 |
| SLC12A2 | 23.9 | 22.7 | 23.9 | 23.8 | 23.9 | 24.3 | 23.7 | 23.9 | 24.3 | 24.6 | 24.8 | 23.3 | 23.8 | 23.8 | 24.8 | 25.6 | 24.8 | 26.4 | 24.2 | 25.2 | 23.9 | 25.0 | 0.0 | -1.1 | 3.3E-02 |
| CDK4    | 24.6 | 25.9 | 25.1 | 24.9 | 24.1 | 24.2 | 25.0 | 24.5 | 24.4 | 25.0 | 25.0 | 25.6 | 24.9 | 24.4 | 26.0 | 24.9 | 26.0 | 25.7 | 26.8 | 28.5 | 24.9 | 26.0 | 0.0 | -1.1 | 3.4E-02 |
| ATP2B1  | 26.5 | 26.8 | 26.6 | 27.1 | 26.7 | 26.2 | 26.3 | 25.8 | 26.6 | 26.9 | 26.9 | 26.9 | 26.9 | 26.7 | 27.3 | 28.0 | 28.1 | 27.4 | 27.6 | 28.5 | 26.7 | 27.8 | 0.0 | -1.1 | 3.4E-02 |
| BICD2   | 22.9 | 24.1 | 23.6 | 23.3 | 23.5 | NaN  | 23.4 | 23.1 | 23.3 | 23.3 | 23.4 | 22.7 | 23.4 | 23.1 | 23.6 | 24.6 | 24.0 | 25.9 | 25.3 | 24.2 | 23.3 | 24.4 | 0.0 | -1.1 | 3.4E-02 |
| PTMS    | 28.7 | 29.3 | 28.6 | 28.9 | 29.1 | 28.7 | 29.0 | 28.8 | 29.4 | 29.0 | 29.3 | 28.1 | 29.3 | 29.1 | 29.9 | 30.1 | 30.8 | 30.1 | 28.8 | 30.1 | 29.0 | 30.1 | 0.0 | -1.1 | 3.5E-02 |
| TRIM2   | 24.8 | 25.8 | 26.4 | 26.2 | 25.9 | 25.9 | 25.6 | 26.0 | 25.4 | 25.9 | 25.8 | 25.6 | 25.9 | 25.8 | 25.9 | 27.0 | 25.9 | 27.3 | 26.9 | 27.0 | 25.8 | 26.9 | 0.0 | -1.1 | 3.5E-02 |
| TMX4    | 23.0 | 22.9 | 22.7 | 22.3 | 23.2 | 23.1 | 22.7 | 21.9 | 22.9 | 22.1 | 23.0 | 23.2 | 23.5 | NaN  | 23.6 | 25.2 | 24.5 | 22.7 | 23.0 | 24.4 | 22.9 | 24.0 | 0.0 | -1.1 | 3.5E-02 |
| JAM3    | 22.5 | 22.6 | 22.9 | 22.7 | NaN  | NaN  | NaN  | 22.3 | NaN  | 22.7 | 22.9 | 22.6 | 23.0 | 23.2 | 23.9 | 23.6 | 24.5 | 23.8 | 23.5 | 24.6 | 22.7 | 23.8 | 0.0 | -1.1 | 3.5E-02 |
| TP53I3  | 27.0 | 27.5 | 28.2 | 27.6 | 26.6 | 26.9 | 27.1 | 27.3 | 27.0 | 27.6 | 27.7 | 27.2 | 27.6 | 26.8 | 27.4 | 28.7 | 28.5 | 29.1 | 27.8 | 28.1 | 27.2 | 28.3 | 0.0 | -1.1 | 3.6E-02 |
| TERF2IP | 25.4 | 25.1 | 25.0 | 24.4 | 24.4 | 25.2 | 24.6 | 25.3 | 24.9 | 25.3 | 25.3 | 24.9 | 24.9 | 25.6 | 26.2 | 26.2 | 26.0 | 25.6 | 25.7 | 26.5 | 25.0 | 26.1 | 0.0 | -1.1 | 3.7E-02 |
| CYB5R1  | 23.3 | 23.9 | 23.5 | 23.9 | 24.1 | NaN  | 23.8 | 24.2 | 23.6 | 23.4 | 23.3 | 23.9 | 24.3 | 24.0 | 23.7 | 26.0 | 25.4 | 24.0 | 24.5 | 25.4 | 23.9 | 24.9 | 0.0 | -1.1 | 3.7E-02 |
| TAGLN2  | 29.5 | 28.7 | 27.9 | 28.9 | 28.8 | 29.2 | 29.5 | 29.2 | 29.1 | 29.1 | 28.6 | 28.5 | 28.7 | 29.2 | 29.4 | 30.6 | 29.7 | 30.4 | 31.1 | 29.3 | 29.0 | 30.0 | 0.0 | -1.1 | 3.7E-02 |
| TSG101  | 25.9 | 26.8 | 26.0 | 26.3 | 25.9 | 26.2 | 26.1 | 26.7 | 26.0 | 26.1 | 26.2 | 26.1 | 26.0 | 26.0 | 26.5 | 27.4 | 26.6 | 27.1 | 27.2 | 27.2 | 26.1 | 27.1 | 0.0 | -1.1 | 3.8E-02 |
| TFG     | 26.4 | 26.4 | 26.3 | 27.1 | 26.7 | 26.8 | 26.2 | 26.5 | 26.5 | 26.9 | 26.7 | 26.5 | 26.6 | 26.5 | 26.9 | 27.6 | 27.7 | 27.7 | 27.4 | 27.6 | 26.5 | 27.6 | 0.0 | -1.1 | 3.8E-02 |
| NEDD1   | 24.5 | 24.1 | 22.4 | 24.4 | 24.7 | 24.2 | 24.1 | 23.2 | 23.8 | 24.6 | 24.3 | 23.4 | 23.9 | 24.3 | 24.6 | 25.8 | 25.4 | 25.1 | 25.3 | 23.8 | 24.1 | 25.2 | 0.0 | -1.1 | 3.9E-02 |
| ERAP1   | 24.0 | 25.2 | 24.2 | 24.0 | 24.4 | 24.5 | 24.8 | 25.2 | 23.9 | 24.4 | 24.3 | 23.9 | 24.0 | 23.8 | 24.5 | 26.0 | 26.1 | 24.8 | 25.0 | 25.6 | 24.2 | 25.3 | 0.0 | -1.1 | 3.9E-02 |
| ELMO2   | 25.0 | 25.3 | 25.2 | 25.4 | 25.0 | 24.9 | 25.1 | 24.9 | 25.2 | 25.5 | 25.2 | 25.7 | 25.2 | 25.2 | 25.4 | 26.4 | 26.6 | 26.2 | 24.9 | 26.3 | 25.2 | 26.3 | 0.0 | -1.1 | 3.9E-02 |
| TRIO    | 24.7 | 25.5 | 24.4 | 24.7 | 24.2 | 24.7 | 24.2 | 24.0 | 24.5 | 24.0 | 24.4 | 25.6 | 23.8 | 24.9 | 25.4 | 26.4 | 27.4 | 25.0 | 24.8 | 25.6 | 24.5 | 25.5 | 0.0 | -1.0 | 4.0E-02 |
| PFN2    | 28.3 | 28.0 | 28.3 | 27.8 | 28.4 | 28.6 | 28.6 | 28.2 | 28.2 | 28.2 | 28.5 | 28.1 | 29.0 | 28.5 | 28.8 | 29.3 | 29.2 | 29.4 | 29.4 | 29.9 | 28.3 | 29.3 | 0.0 | -1.0 | 4.0E-02 |
| SUMF2   | 25.9 | 25.4 | 25.3 | 25.5 | 25.4 | 25.3 | 25.5 | 25.2 | 25.7 | 25.7 | 25.5 | 26.4 | 25.7 | 25.9 | 26.4 | 26.5 | 26.5 | 26.1 | 27.1 | 27.5 | 25.5 | 26.5 | 0.0 | -1.0 | 4.0E-02 |
| FN3KRP  | 24.1 | 23.8 | 24.5 | 24.6 | 24.5 | 24.5 | 24.8 | 24.7 | 24.2 | 24.7 | 24.6 | 24.1 | 24.9 | 24.0 | 25.2 | 25.7 | 25.2 | 25.7 | 25.4 | 26.4 | 24.5 | 25.5 | 0.0 | -1.0 | 4.1E-02 |
| HARS    | 28.6 | 28.8 | 29.4 | 29.2 | 28.0 | 28.1 | 28.4 | 29.1 | 28.6 | 28.7 | 28.5 | 28.9 | 28.7 | 28.4 | 28.9 | 29.5 | 29.8 | 29.7 | 29.7 | 29.9 | 28.7 | 29.7 | 0.0 | -1.0 | 4.1E-02 |
| GBE1    | 25.7 | 25.6 | 26.3 | 26.0 | 25.8 | 26.2 | 25.7 | 25.7 | 25.5 | 25.5 | 26.1 | 25.6 | 26.3 | 25.8 | 26.5 | 26.5 | 27.6 | 26.9 | 26.9 | 26.8 | 25.8 | 26.8 | 0.0 | -1.0 | 4.2E-02 |
| ACP2    | 24.9 | 25.4 | 25.1 | 23.7 | 25.4 | 25.0 | 24.9 | 25.2 | 24.8 | 25.1 | 25.3 | 24.8 | 25.4 | 25.1 | 25.6 | 26.7 | 25.9 | 26.3 | 25.3 | 26.9 | 25.1 | 26.1 | 0.0 | -1.0 | 4.2E-02 |
| MVD     | 28.9 | 28.8 | 29.3 | 29.2 | 28.7 | 29.2 | 28.7 | 29.1 | 28.8 | 29.0 | 29.1 | 29.0 | 29.2 | 29.1 | 29.0 | 30.0 | 30.1 | 30.7 | 30.4 | 30.0 | 29.0 | 30.1 | 0.0 | -1.0 | 4.2E-02 |
| UFL1    | 26.4 | 26.3 | 26.7 | 27.3 | 27.1 | 27.0 | 27.0 | 26.8 | 26.7 | 26.4 | 26.6 | 26.6 | 27.3 | 26.4 | 27.3 | 28.4 | 28.1 | 27.5 | 27.3 | 28.0 | 26.7 | 27.8 | 0.0 | -1.0 | 4.2E-02 |
| CCDC90B | NaN  | NaN  | 21.5 | 22.2 | NaN  | 21.7 | 21.3 | NaN  | 21.8 | 21.1 | NaN  | NaN  | 22.2 | 21.4 | 21.5 | 23.0 | 22.0 | 23.1 | 23.0 | 22.2 | 21.6 | 22.6 | 0.0 | -1.0 | 4.2E-02 |
| FAM127A | 23.4 | 24.3 | 22.4 | 22.4 | NaN  | 22.4 | 23.1 | 24.0 | 22.5 | 23.5 | 23.4 | 23.4 | 23.9 | 23.4 | 23.2 | 24.9 | 24.9 | 25.0 | 24.0 | 24.0 | 23.4 | 24.4 | 0.0 | -1.0 | 4.3E-02 |
| ARL6IP5 | 27.1 | 27.2 | 27.2 | 26.4 | 27.2 | 27.6 | 26.8 | 26.7 | 27.0 | 27.5 | 27.1 | 27.3 | 27.2 | 27.3 | 27.7 | 29.2 | 28.2 | 28.2 | 28.0 | 29.0 | 27.2 | 28.2 | 0.0 | -1.0 | 4.3E-02 |
| RABGAP1 | 25.6 | 25.8 | 25.5 | 25.6 | 25.2 | 25.1 | 25.9 | 25.6 | 25.3 | 26.2 | 25.7 | 25.3 | 25.8 | 25.9 | 26.1 | 27.2 | 26.7 | 27.3 | 26.3 | 26.6 | 25.6 | 26.6 | 0.0 | -1.0 | 4.3E-02 |
| PURB    | 25.7 | 24.3 | 25.8 | 26.9 | 24.2 | 24.8 | 25.8 | 25.2 | 25.0 | 25.9 | 25.8 | 25.3 | 25.9 | 25.4 | 25.9 | 26.3 | 26.3 | 27.9 | 26.9 | 27.0 | 25.6 | 26.6 | 0.0 | -1.0 | 4.4E-02 |
| SUCLG1  | 27.9 | 28.0 | 27.7 | 28.5 | 27.6 | 27.3 | 27.8 | 27.3 | 27.8 | 28.0 | 27.7 | 28.2 | 27.7 | 28.4 | 28.2 | 28.9 | 28.8 | 28.6 | 28.9 | 28.9 | 27.8 | 28.8 | 0.0 | -1.0 | 4.4E-02 |
| ITGAV   | 27.4 | 27.3 | 26.1 | 27.5 | 27.3 | 26.9 | 27.4 | 26.6 | 27.0 | 27.4 | 26.9 | 27.3 | 27.0 | 27.2 | 27.1 | 29.5 | 28.2 | 29.0 | 28.1 | 28.3 | 27.2 | 28.3 | 0.0 | -1.0 | 4.4E-02 |
| FAHD1   | 26.3 | 26.1 | 26.4 | 27.0 | 26.6 | 26.7 | 26.6 | 26.8 | 26.5 | 26.6 | 26.0 | 26.6 | 26.6 | 26.6 | 26.9 | 28.0 | 27.6 | 27.8 | 27.4 | 27.7 | 26.6 | 27.6 | 0.0 | -1.0 | 4.4E-02 |
| ACOX3   | 23.0 | 23.9 | NaN  | 23.3 | NaN  | NaN  | 23.1 | 23.7 | NaN  | 23.3 | 22.8 | 23.4 | 23.0 | 23.2 | 23.4 | 24.2 | 25.5 | 24.4 | 24.0 | 26.1 | 23.3 | 24.3 | 0.0 | -1.0 | 4.5E-02 |
| DCTN2   | 28.9 | 29.5 | 28.9 | 29.1 | 28.6 | 28.5 | 29.0 | 29.9 | 28.9 | 29.2 | 29.2 | 28.9 | 29.2 | 29.3 | 29.6 | 30.6 | 29.9 | 30.6 | 29.9 | 30.3 | 29.1 | 30.1 | 0.0 | -1.0 | 4.5E-02 |
| ZNF512  | 26.1 | 26.3 | 25.8 | 25.6 | 26.5 | 26.7 | 25.9 | 26.3 | 24.9 | 26.5 | 26.5 | 25.5 | 26.4 | 26.3 | 27.3 | 27.4 | 27.2 | 26.9 | 26.4 | 27.5 | 26.3 | 27.3 | 0.0 | -1.0 | 4.5E-02 |
| G6PD    | 29.4 | 29.7 | 29.9 | 29.5 | 29.5 | 29.7 | 29.6 | 29.3 | 29.5 | 29.6 | 29.8 | 29.4 | 30.1 | 29.8 | 29.9 | 30.4 | 30.3 | 30.9 | 30.9 | 30.9 | 29.6 | 30.6 | 0.0 | -1.0 | 4.6E-02 |
| PCYT2   | 25.6 | 25.6 | 25.5 | 26.1 | 26.0 | 26.7 | 25.8 | 25.4 | 25.3 | 25.7 | 25.8 | 25.4 | 25.5 | 25.9 | 25.7 | 26.6 | 26.6 | 26.9 | 27.0 | 26.7 | 25.7 | 26.7 | 0.0 | -1.0 | 4.6E-02 |
| SESTD1  | 22.4 | 22.8 | 23.1 | 23.4 | 22.9 | 24.1 | 23.1 | 22.8 | 23.2 | 23.8 | 23.2 | 23.6 | 21.9 | 22.9 | 23.9 | 24.2 | 24.7 | 24.0 | 23.7 | 24.3 | 23.1 | 24.1 | 0.0 | -1.0 | 4.6E-02 |
| MSN     | 32.2 | 32.2 | 32.3 | 32.3 | 32.1 | 32.1 | 32.8 | 32.5 | 32.1 | 32.5 | 32.6 | 32.1 | 32.7 | 32.5 | 32.6 | 33.8 | 33.3 | 33.5 | 32.9 | 33.3 | 32.3 | 33.3 | 0.0 | -1.0 | 4.6E-02 |



|         |      |      |      |      |      |      |      |      |      |      |      |      |      |      |      |      |      |      |      |      |      |      |     |      |         |
|---------|------|------|------|------|------|------|------|------|------|------|------|------|------|------|------|------|------|------|------|------|------|------|-----|------|---------|
| AKT1S1  | 24.9 | NaN  | 25.3 | 25.1 | 25.3 | 24.9 | 25.0 | NaN  | 25.1 | 25.5 | 25.3 | NaN  | 25.0 | 25.7 | 25.4 | 26.1 | 26.1 | 25.7 | NaN  | 26.2 | 25.1 | 26.1 | 0.0 | -1.0 | 4.6E-02 |
| PLXNA1  | 28.0 | 29.2 | 27.6 | 28.2 | 28.1 | 30.5 | 27.2 | 27.4 | 27.4 | 29.2 | 28.0 | 29.6 | 27.4 | 27.7 | 28.4 | 29.3 | 28.8 | 30.1 | 29.1 | 28.9 | 28.0 | 29.0 | 0.0 | -1.0 | 4.6E-02 |
| SDCBP   | 27.2 | 26.6 | 27.4 | 27.0 | 26.4 | 26.9 | 27.2 | 27.0 | 27.0 | 27.6 | 27.3 | 27.2 | 27.3 | 27.1 | 27.4 | 28.5 | 28.4 | 27.9 | 27.2 | 29.3 | 27.1 | 28.1 | 0.0 | -1.0 | 4.7E-02 |
| ASPH    | 26.4 | 26.4 | 26.4 | 26.4 | 26.8 | 26.7 | 25.9 | 26.9 | 26.2 | 26.6 | 26.5 | 26.7 | 26.5 | 26.4 | 26.5 | 27.5 | 28.0 | 27.5 | 27.4 | 28.3 | 26.5 | 27.5 | 0.0 | -1.0 | 4.7E-02 |
| APPL2   | 23.6 | 23.4 | 23.7 | NaN  | NaN  | NaN  | NaN  | 22.4 | 23.0 | 24.3 | 23.4 | 24.8 | 23.2 | 22.5 | 24.0 | 27.7 | 24.3 | 26.1 | 24.6 | 24.2 | 23.4 | 24.4 | 0.0 | -1.0 | 4.8E-02 |
| H2AFY   | 29.9 | 30.5 | 30.3 | 29.8 | 30.3 | 30.1 | 29.8 | 30.2 | 30.3 | 30.4 | 30.7 | 30.5 | 30.6 | 30.4 | 31.2 | 32.0 | 31.4 | 31.2 | 30.9 | 31.3 | 30.3 | 31.3 | 0.0 | -1.0 | 4.8E-02 |
| UHRF1   | 27.1 | 27.3 | 27.0 | 27.3 | 27.5 | 27.3 | 27.0 | 27.2 | 27.0 | 27.6 | 27.5 | 27.3 | 26.9 | 27.2 | 28.5 | 27.9 | 28.3 | 28.4 | 28.2 | 27.2 | 27.2 | 28.2 | 0.0 | -1.0 | 4.8E-02 |
| GATAD2B | 26.2 | 26.2 | 26.4 | 26.3 | 26.7 | 26.3 | 26.3 | 26.2 | 26.3 | 27.0 | 27.0 | 26.2 | 26.5 | 26.8 | 27.3 | 27.0 | 28.3 | 27.0 | 27.4 | 27.7 | 26.3 | 27.3 | 0.0 | -1.0 | 4.8E-02 |
| VPS35   | 28.6 | 28.6 | 29.0 | 28.8 | 28.5 | 28.6 | 28.7 | 28.8 | 28.7 | 28.8 | 28.8 | 28.9 | 29.2 | 28.8 | 29.0 | 30.2 | 29.9 | 30.0 | 29.5 | 29.7 | 28.8 | 29.8 | 0.0 | -1.0 | 4.8E-02 |
| NECAP2  | 25.2 | 25.3 | 25.7 | 25.1 | 24.1 | 24.7 | 25.2 | 25.1 | 25.4 | 25.8 | 25.5 | 24.9 | 25.4 | 25.1 | 25.7 | 26.1 | 26.2 | 25.9 | 26.3 | 26.3 | 25.2 | 26.2 | 0.0 | -1.0 | 4.9E-02 |
| CARS2   | 24.4 | 23.8 | 24.8 | 24.7 | 23.7 | 23.5 | 23.4 | 23.6 | 24.1 | 24.3 | 24.1 | 24.5 | 24.4 | 24.0 | 24.3 | 25.5 | 24.7 | 25.8 | 24.6 | 25.5 | 24.1 | 25.1 | 0.0 | -1.0 | 4.9E-02 |
