# Supplementary material for: Reprogrammed Cells Display Distinct Proteomic Signatures Associated with Colony Morphology Variability
Source: Hindawi journal article supplement (doi:10.1155/2019/8036035), 2019-11-18
Supplement: f1 [file 8036035.f1.zip]

**Supplement table 4: Activated upstream regulators in the transformed morphology group.**

© 2000-2019 QIAGEN. All rights reserved.

| Upstream Regulator    | Molecule Type                     | Predicted Activation State | Activation z-score | p-value of overlap |
|-----------------------|-----------------------------------|----------------------------|--------------------|--------------------|
| TCF7L2                | transcription regulator           | Activated                  | 3,706              | 0,0000207          |
| CTGF                  | growth factor                     | Activated                  | 3,145              | 0,000678           |
| TGFB1                 | growth factor                     | Activated                  | 3,066              | 1,46E-12           |
| ETV5                  | transcription regulator           | Activated                  | 2,813              | 0,0000138          |
| VCAN                  | other                             | Activated                  | 2,621              | 0,154              |
| TNF                   | cytokine                          | Activated                  | 2,607              | 0,0000681          |
| MYOD1                 | transcription regulator           | Activated                  | 2,587              | 0,159              |
| IL4                   | cytokine                          | Activated                  | 2,579              | 0,00012            |
| TP53                  | transcription regulator           | Activated                  | 2,567              | 1,96E-22           |
| SREBF1                | transcription regulator           | Activated                  | 2,554              | 0,0000254          |
| PRKCD                 | kinase                            | Activated                  | 2,449              | 0,432              |
| GATA6                 | transcription regulator           | Activated                  | 2,425              | 0,447              |
| GH1                   | growth factor                     | Activated                  | 2,395              | 0,0411             |
| SREBF2                | transcription regulator           | Activated                  | 2,373              | 0,0000459          |
| TWIST1                | transcription regulator           | Activated                  | 2,359              | 0,0118             |
| Collagen type I       | complex                           | Activated                  | 2,298              | 0,0000826          |
| PAX7                  | transcription regulator           | Activated                  | 2,236              | 0,0157             |
| THRB                  | ligand-dependent nuclear receptor | Activated                  | 2,236              | 0,00777            |
| TWIST2                | transcription regulator           | Activated                  | 2,234              | 0,00298            |
| FGF10                 | growth factor                     | Activated                  | 2,219              | 0,00406            |
| NOTCH3                | transcription regulator           | Activated                  | 2,219              | 0,0037             |
| MAP2K1                | kinase                            | Activated                  | 2,216              | 0,0713             |
| SNAI1                 | transcription regulator           | Activated                  | 2,208              | 0,000000242        |
| PTK2                  | kinase                            | Activated                  | 2,195              | 0,000869           |
| VEGFA                 | growth factor                     | Activated                  | 2,17               | 0,000678           |
| OSM                   | cytokine                          | Activated                  | 2,17               | 0,000238           |
| ALDH2                 | enzyme                            | Activated                  | 2,138              | 0,000000113        |
| TGFB3                 | growth factor                     | Activated                  | 2,126              | 0,0122             |
| Tgf beta              | group                             | Activated                  | 2,098              | 0,0215             |
| SPP1                  | cytokine                          | Activated                  | 2,072              | 0,000000797        |
| HNF4A                 | transcription regulator           | Activated                  | 2,065              | 4,12E-09           |
| GLI1                  | transcription regulator           | Activated                  | 2,028              | 0,00165            |
| TP73                  | transcription regulator           | Activated                  | 2,02               | 0,00787            |
| LTA                   | cytokine                          | Activated                  | 2                  | 0,0356             |
| Focal adhesion kinase | group                             | Activated                  | 2                  | 0,00905            |
| EDN3                  | other                             | Activated                  | 2                  | 0,00241            |
| SIRT2                 | transcription regulator           | Activated                  | 2                  | 0,00163            |
| CSNK2A1               | kinase                            | Activated                  | 2                  | 0,00104            |
