# Supplementary material for: Reprogrammed Cells Display Distinct Proteomic Signatures Associated with Colony Morphology Variability
Source: Stem Cells Int. 2019 Nov 18;2019:8036035. doi: 10.1155/2019/8036035 (PMC6885794; doi:10.1155/2019/8036035)
Supplement: Supplementary 1 — Supplementary table 1: information about the hiPSC lines included in the study. Supplementary table 2: a list of proteins being more abundant in stable colony morphology group. Supplementary table 3: a list of proteins being more abundant in the unstable colony morphology group. Supplementary table 4: activated upstream regulators in the unstable colony morphology group. [file 8036035.f1.zip]

Archive with 4 entries (4 files):
- Supplementary table 1.pdf
- Supplementary table 2.pdf
- Supplementary table 3.pdf
- supplementary table 4.pdf
